# Supplementary material
Source: publisher figshare collection journal article supplement (https://gsapubs.figshare.com/ndownloader/files/28833666)
Supplement: Supplementary file 1 [file 28833666]

## Sheet: K17-133.5_2nd.Laser
Table S1. 40Ar/39Ar analytical data.
	ID	Power	40Ar/39Ar	37Ar/39Ar	36Ar/39Ar	39ArK	K/Ca	40Ar*	Age	±1s	Ar36_ICFactorEr								Run_ID	Sample	System	Run_Date	Run_Hour	Run_SecSince1904	PrincipalInvestigator	Material	Hole #	Project	Locality	File	Version	History	Comment	Fit_Type	Signal Norm.	Run Script	Fract_Deliv_To_MS	Heating_Dev	Pwr_Requested	Pwr_Achieved	Pwr_AchievedSD	Pwr_AchievedMax	OP_Temp	Tot_Dur_Heating	Dur_Heating_At_Req_Pwr	Holes	X_Y_Pos	Laser Scan File	Beam_Dia
		(watts)			(x 10-3)	(x 10-15 mol)		(%)	(Ma)	(Ma)
	K17-133.5, DetritalSanidine, J=0.0019056±0.02%, IC=0.9940154±0.0020152, NM-304B, Lab#=67058, Argus VI
	114	3	0.36445	0.0070394	0.581	0.635365	72.4783	53.0379	0.673897	0.0337937	0.0020152								67058-114	K17-133.5	37	2019-10-16	21.7333	3654107000	Heizler, M	DetritalSanidine	24	Heizler01192		localhost	7.875	Ar41 = A, deleting t<30 @ 10/17/19 8:30 AM; Ar40 = L @ 10/17/19 8:30 AM; Ar39 = L @ 10/17/19 8:30 AM; Ar38 = L @ 10/17/19 8:30 AM; Ar37 = L @ 10/17/19 8:30 AM; Ar36 = L @ 10/17/19 8:30 AM; Ar41 bk val,er = @ 10/17/19 8:35 AM; Average background @ 10/17/19 8:35 AM; Ar40 bk val,er = @ 10/17/19 8:35 AM; Line-segment interpolation @ 10/17/19 8:35 AM; Ar39 bk val,er = @ 10/17/19 8:35 AM; Average backg…	B:24 DS	ALLLLLAAAAAA	1	Pychron Script	1	Fusions CO2	3	0	0	0	0	30	30	206			0
	179	3	0.416374	0.0155494	0.7589	0.607701	32.8118	46.4283	0.673996	0.0279926	0.0019153								67058-179	K17-133.5	37	2019-10-21	9.76667	3654496000	Heizler, M	DetritalSanidine	24	Heizler01192		localhost	7.875	Ar41 = A, deleting t<30 @ 10/21/19 12:44 PM; Ar40 = P @ 10/21/19 12:44 PM; Ar39 = P @ 10/21/19 12:44 PM; Ar38 = L @ 10/21/19 12:44 PM; Ar37 = L @ 10/21/19 12:44 PM; Ar36 = P @ 10/21/19 12:44 PM; Ar41 bk val,er = @ 10/21/19 12:47 PM; Average background @ 10/21/19 12:47 PM; Ar40 bk val,er = @ 10/21/19 12:47 PM; Line-segment interpolation @ 10/21/19 12:47 PM; Ar39 bk val,er = @ 10/21/19 12:47 PM; Av…	B:24 DS	APPLLPAAAAAA	1	Pychron Script	1	Fusions CO2	3	0	0	0	0	30	30	187			0
x	95	3	2.43512	0.007678	1.0478	1.30977	66.4501	87.3098	7.40089	0.0226617	0.0020152								67058-95	K17-133.5	37	2019-10-16	19.1333	3654098000	Heizler, M	DetritalSanidine	24	Heizler01192		localhost	7.875	Ar41 = A, deleting t<30 @ 10/17/19 8:30 AM; Ar40 = L @ 10/17/19 8:30 AM; Ar39 = L @ 10/17/19 8:30 AM; Ar38 = L @ 10/17/19 8:30 AM; Ar37 = L @ 10/17/19 8:30 AM; Ar36 = L @ 10/17/19 8:30 AM; Ar41 bk val,er = @ 10/17/19 8:35 AM; Average background @ 10/17/19 8:35 AM; Ar40 bk val,er = @ 10/17/19 8:35 AM; Line-segment interpolation @ 10/17/19 8:35 AM; Ar39 bk val,er = @ 10/17/19 8:35 AM; Average backg…	B:24 DS	ALLLLLAAAAAA	1	Pychron Script	1	Fusions CO2	3	0	0	0	0	30	30	186			0
x	131	3	3.16577	0.0169859	1.9344	0.858922	30.0369	81.9863	9.03101	0.0205828	0.0019153								67058-131	K17-133.5	37	2019-10-20	10.7333	3654413000	Heizler, M	DetritalSanidine	24	Heizler01192		localhost	7.875	Ar41 = A, deleting t<30 @ 10/21/19 12:42 PM; Ar40 = L @ 10/21/19 12:42 PM; Ar39 = L @ 10/21/19 12:42 PM; Ar38 = L @ 10/21/19 12:42 PM; Ar37 = L @ 10/21/19 12:42 PM; Ar36 = L @ 10/21/19 12:42 PM; Ar41 bk val,er = @ 10/21/19 12:46 PM; Average background @ 10/21/19 12:46 PM; Ar40 bk val,er = @ 10/21/19 12:46 PM; Line-segment interpolation @ 10/21/19 12:46 PM; Ar39 bk val,er = @ 10/21/19 12:46 PM; Av…	B:24 DS	ALLLLLAAAAAA	1	Pychron Script	1	Fusions CO2	3	0	0	0	0	30	30	136			0
x	176	3	5.94653	0.0280826	2.1902	0.605662	18.168	89.1542	18.4001	0.054847	0.0019153								67058-176	K17-133.5	37	2019-10-21	9.35	3654494000	Heizler, M	DetritalSanidine	24	Heizler01192		localhost	7.875	Ar41 = A, deleting t<30 @ 10/21/19 12:43 PM; Ar40 = L @ 10/21/19 12:43 PM; Ar39 = L @ 10/21/19 12:43 PM; Ar38 = L @ 10/21/19 12:43 PM; Ar37 = L @ 10/21/19 12:43 PM; Ar36 = L @ 10/21/19 12:43 PM; Ar41 bk val,er = @ 10/21/19 12:47 PM; Average background @ 10/21/19 12:47 PM; Ar40 bk val,er = @ 10/21/19 12:47 PM; Line-segment interpolation @ 10/21/19 12:47 PM; Ar39 bk val,er = @ 10/21/19 12:47 PM; Av…	B:24 DS	ALLLLLAAAAAA	1	Pychron Script	1	Fusions CO2	3	0	0	0	0	30	30	184			0
x	197	3	5.44069	0.0140362	0.263	2.07555	36.3492	98.592	18.6157	0.0143735	0.0019153								67058-197	K17-133.5	37	2019-10-21	11.9667	3654504000	Heizler, M	DetritalSanidine	24	Heizler01192		localhost	7.875	Ar41 = A, deleting t<30 @ 10/21/19 12:43 PM; Ar40 = L @ 10/21/19 12:43 PM; Ar39 = L @ 10/21/19 12:43 PM; Ar38 = L @ 10/21/19 12:43 PM; Ar37 = L @ 10/21/19 12:43 PM; Ar36 = L @ 10/21/19 12:43 PM; Ar41 bk val,er = @ 10/21/19 12:47 PM; Average background @ 10/21/19 12:47 PM; Ar40 bk val,er = @ 10/21/19 12:47 PM; Line-segment interpolation @ 10/21/19 12:47 PM; Ar39 bk val,er = @ 10/21/19 12:47 PM; Av…	B:24 DS	ALLLLLAAAAAA	1	Pychron Script	1	Fusions CO2	3	0	0	0	0	30	30	205			0
x	94	3	5.70152	0.0066889	0.9192	0.66885	76.2762	95.2453	18.8447	0.0413181	0.0020152								67058-94	K17-133.5	37	2019-10-16	19.0333	3654097000	Heizler, M	DetritalSanidine	24	Heizler01192		localhost	7.875	Ar41 = A, deleting t<30 @ 10/17/19 8:30 AM; Ar40 = L @ 10/17/19 8:30 AM; Ar39 = L @ 10/17/19 8:30 AM; Ar38 = L @ 10/17/19 8:30 AM; Ar37 = L @ 10/17/19 8:30 AM; Ar36 = L @ 10/17/19 8:30 AM; Ar41 bk val,er = @ 10/17/19 8:35 AM; Average background @ 10/17/19 8:35 AM; Ar40 bk val,er = @ 10/17/19 8:35 AM; Line-segment interpolation @ 10/17/19 8:35 AM; Ar39 bk val,er = @ 10/17/19 8:35 AM; Average backg…	B:24 DS	ALLLLLAAAAAA	1	Pychron Script	1	Fusions CO2	3	0	0	0	0	30	30	185			0
x	79	3	5.95368	0.0068355	0.3263	3.59268	74.6403	98.3893	20.3195	0.0101084	0.0020152								67058-79	K17-133.5	37	2019-10-16	16.3	3654088000	Heizler, M	DetritalSanidine	24	Heizler01192		localhost	7.875	Ar41 = A, deleting t<30 @ 10/17/19 8:30 AM; Ar40 = L @ 10/17/19 8:30 AM; Ar39 = L @ 10/17/19 8:30 AM; Ar38 = L @ 10/17/19 8:30 AM; Ar37 = L @ 10/17/19 8:30 AM; Ar36 = L @ 10/17/19 8:30 AM; Ar41 bk val,er = @ 10/17/19 8:35 AM; Average background @ 10/17/19 8:35 AM; Ar40 bk val,er = @ 10/17/19 8:35 AM; Line-segment interpolation @ 10/17/19 8:35 AM; Ar39 bk val,er = @ 10/17/19 8:35 AM; Average backg…	B:24 DS	ALLLLLAAAAAA	1	Pychron Script	1	Fusions CO2	3	0	0	0	0	30	30	169			0
x	60	3	10.1354	0.0342358	11.2276	0.104059	14.9026	67.2927	23.6377	0.275912	0.0012293								67058-60	K17-133.5	37	2019-10-08	19.2667	3653407000	Heizler, M	DetritalSanidine	24	Heizler01192		localhost	7.875	Ar41 bk val,er = @ 10/14/19 9:15 AM; Average background @ 10/14/19 9:15 AM; Ar40 bk val,er = @ 10/14/19 9:15 AM; Line-segment interpolation @ 10/14/19 9:15 AM; Ar39 bk val,er = @ 10/14/19 9:15 AM; Average background @ 10/14/19 9:15 AM; Ar38 bk val,er = @ 10/14/19 9:15 AM; Average background @ 10/14/19 9:15 AM; Ar37 bk val,er = @ 10/14/19 9:15 AM; Average background @ 10/14/19 9:15 AM; Ar36 bk val…	B:24 DS	ALLLLLAAAAAA	1	Pychron Script	1	Fusions CO2	3	0	0	0	0	30	30	142			0
x	31	3	7.07164	0.0065424	0.5197	1.48154	77.9842	97.8358	23.9753	0.0216513	0.0012293								67058-31	K17-133.5	37	2019-10-08	15.55	3653394000	Heizler, M	DetritalSanidine	24	Heizler01192		localhost	7.875	Ar41 bk val,er = @ 10/14/19 9:15 AM; Average background @ 10/14/19 9:15 AM; Ar40 bk val,er = @ 10/14/19 9:15 AM; Line-segment interpolation @ 10/14/19 9:15 AM; Ar39 bk val,er = @ 10/14/19 9:15 AM; Average background @ 10/14/19 9:15 AM; Ar38 bk val,er = @ 10/14/19 9:15 AM; Average background @ 10/14/19 9:15 AM; Ar37 bk val,er = @ 10/14/19 9:15 AM; Average background @ 10/14/19 9:15 AM; Ar36 bk val…	B:24 DS	ALLLLLAAAAAA	1	Pychron Script	1	Fusions CO2	3	0	0	0	0	30	30	113			0
x	175	3	7.22561	0.0118221	0.7381	1.12712	43.1568	96.9947	24.2848	0.030292	0.0019153								67058-175	K17-133.5	37	2019-10-21	8.91667	3654493000	Heizler, M	DetritalSanidine	24	Heizler01192		localhost	7.875	Ar41 = A, deleting t<30 @ 10/21/19 12:43 PM; Ar40 = L @ 10/21/19 12:43 PM; Ar39 = L @ 10/21/19 12:43 PM; Ar38 = L @ 10/21/19 12:43 PM; Ar37 = L @ 10/21/19 12:43 PM; Ar36 = L @ 10/21/19 12:43 PM; Ar41 bk val,er = @ 10/21/19 12:47 PM; Average background @ 10/21/19 12:47 PM; Ar40 bk val,er = @ 10/21/19 12:47 PM; Line-segment interpolation @ 10/21/19 12:47 PM; Ar39 bk val,er = @ 10/21/19 12:47 PM; Av…	B:24 DS	ALLLLLAAAAAA	1	Pychron Script	1	Fusions CO2	3	0	0	0	0	30	30	183			0
x	07	3	7.91093	0.0078354	1.8065	1.04107	65.1152	93.2598	25.5554	0.032896	0.0012293								67058-07	K17-133.5	37	2019-10-08	8.96667	3653370000	Heizler, M	DetritalSanidine	24	Heizler01192		localhost	7.875	Ar41 bk val,er = @ 10/14/19 9:15 AM; Average background @ 10/14/19 9:15 AM; Ar40 bk val,er = @ 10/14/19 9:15 AM; Line-segment interpolation @ 10/14/19 9:15 AM; Ar39 bk val,er = @ 10/14/19 9:15 AM; Average background @ 10/14/19 9:15 AM; Ar38 bk val,er = @ 10/14/19 9:15 AM; Average background @ 10/14/19 9:15 AM; Ar37 bk val,er = @ 10/14/19 9:15 AM; Average background @ 10/14/19 9:15 AM; Ar36 bk val…	B:24 DS	ALLLLLAAAAAA	1	Pychron Script	1	Fusions CO2	3	0	0	0	0	30	30	88			0
x	162	3	7.64954	0.0050961	0.9195	1.25373	100.117	96.4533	25.5571	0.0311999	0.0019153								67058-162	K17-133.5	37	2019-10-20	17.4833	3654437000	Heizler, M	DetritalSanidine	24	Heizler01192		localhost	7.875	Ar41 = A, deleting t<30 @ 10/21/19 12:43 PM; Ar40 = L @ 10/21/19 12:43 PM; Ar39 = L @ 10/21/19 12:43 PM; Ar38 = L @ 10/21/19 12:43 PM; Ar37 = L @ 10/21/19 12:43 PM; Ar36 = L @ 10/21/19 12:43 PM; Ar41 bk val,er = @ 10/21/19 12:47 PM; Average background @ 10/21/19 12:47 PM; Ar40 bk val,er = @ 10/21/19 12:47 PM; Line-segment interpolation @ 10/21/19 12:47 PM; Ar39 bk val,er = @ 10/21/19 12:47 PM; Av…	B:24 DS	ALLLLLAAAAAA	1	Pychron Script	1	Fusions CO2	3	0	0	0	0	30	30	168			0
x	43	3	7.51048	0.0050963	0.4326	2.92003	100.113	98.3032	25.5737	0.0129216	0.0012293								67058-43	K17-133.5	37	2019-10-08	16.75	3653398000	Heizler, M	DetritalSanidine	24	Heizler01192		localhost	7.875	Ar41 bk val,er = @ 10/14/19 9:15 AM; Average background @ 10/14/19 9:15 AM; Ar40 bk val,er = @ 10/14/19 9:15 AM; Line-segment interpolation @ 10/14/19 9:15 AM; Ar39 bk val,er = @ 10/14/19 9:15 AM; Average background @ 10/14/19 9:15 AM; Ar38 bk val,er = @ 10/14/19 9:15 AM; Average background @ 10/14/19 9:15 AM; Ar37 bk val,er = @ 10/14/19 9:15 AM; Average background @ 10/14/19 9:15 AM; Ar36 bk val…	B:24 DS	ALLLLLAAAAAA	1	Pychron Script	1	Fusions CO2	3	0	0	0	0	30	30	125			0
x	156	3	7.57626	0.0076342	0.5847	3.348	66.8314	97.7276	25.6461	0.0139061	0.0019153								67058-156	K17-133.5	37	2019-10-20	16.7667	3654435000	Heizler, M	DetritalSanidine	24	Heizler01192		localhost	7.875	Ar41 = A, deleting t<30 @ 10/21/19 12:42 PM; Ar40 = L @ 10/21/19 12:42 PM; Ar39 = L @ 10/21/19 12:42 PM; Ar38 = L @ 10/21/19 12:42 PM; Ar37 = L @ 10/21/19 12:42 PM; Ar36 = L @ 10/21/19 12:42 PM; Ar41 bk val,er = @ 10/21/19 12:47 PM; Average background @ 10/21/19 12:47 PM; Ar40 bk val,er = @ 10/21/19 12:47 PM; Line-segment interpolation @ 10/21/19 12:47 PM; Ar39 bk val,er = @ 10/21/19 12:47 PM; Av…	B:24 DS	ALLLLLAAAAAA	1	Pychron Script	1	Fusions CO2	3	0	0	0	0	30	30	162			0
x	53	3	8.11071	0.0114236	1.2033	1.64382	44.6623	95.627	26.8563	0.0229776	0.0012293								67058-53	K17-133.5	37	2019-10-08	18.4167	3653404000	Heizler, M	DetritalSanidine	24	Heizler01192		localhost	7.875	Ar41 bk val,er = @ 10/14/19 9:15 AM; Average background @ 10/14/19 9:15 AM; Ar40 bk val,er = @ 10/14/19 9:15 AM; Line-segment interpolation @ 10/14/19 9:15 AM; Ar39 bk val,er = @ 10/14/19 9:15 AM; Average background @ 10/14/19 9:15 AM; Ar38 bk val,er = @ 10/14/19 9:15 AM; Average background @ 10/14/19 9:15 AM; Ar37 bk val,er = @ 10/14/19 9:15 AM; Average background @ 10/14/19 9:15 AM; Ar36 bk val…	B:24 DS	ALLLLLAAAAAA	1	Pychron Script	1	Fusions CO2	3	0	0	0	0	30	30	135			0
x	171	3	8.05081	0.0100924	0.9572	0.672751	50.5533	96.4968	26.9001	0.045083	0.0019153								67058-171	K17-133.5	37	2019-10-21	8.46667	3654491000	Heizler, M	DetritalSanidine	24	Heizler01192		localhost	7.875	Ar41 = A, deleting t<30 @ 10/21/19 12:43 PM; Ar40 = L @ 10/21/19 12:43 PM; Ar39 = L @ 10/21/19 12:43 PM; Ar38 = L @ 10/21/19 12:43 PM; Ar37 = L @ 10/21/19 12:43 PM; Ar36 = L @ 10/21/19 12:43 PM; Ar41 bk val,er = @ 10/21/19 12:47 PM; Average background @ 10/21/19 12:47 PM; Ar40 bk val,er = @ 10/21/19 12:47 PM; Line-segment interpolation @ 10/21/19 12:47 PM; Ar39 bk val,er = @ 10/21/19 12:47 PM; Av…	B:24 DS	ALLLLLAAAAAA	1	Pychron Script	1	Fusions CO2	3	0	0	0	0	30	30	179			0
x	186	3	7.97993	0.008586	0.629	1.0185	59.4228	97.6792	26.9893	0.0323031	0.0019153								67058-186	K17-133.5	37	2019-10-21	10.8833	3654500000	Heizler, M	DetritalSanidine	24	Heizler01192		localhost	7.875	Ar41 = A, deleting t<30 @ 10/21/19 12:43 PM; Ar40 = L @ 10/21/19 12:43 PM; Ar39 = L @ 10/21/19 12:43 PM; Ar38 = L @ 10/21/19 12:43 PM; Ar37 = L @ 10/21/19 12:43 PM; Ar36 = L @ 10/21/19 12:43 PM; Ar41 bk val,er = @ 10/21/19 12:47 PM; Average background @ 10/21/19 12:47 PM; Ar40 bk val,er = @ 10/21/19 12:47 PM; Line-segment interpolation @ 10/21/19 12:47 PM; Ar39 bk val,er = @ 10/21/19 12:47 PM; Av…	B:24 DS	ALLLLLAAAAAA	1	Pychron Script	1	Fusions CO2	3	0	0	0	0	30	30	194			0
x	05	3	8.00858	0.0065483	0.6285	2.2069	77.914	97.6874	27.0877	0.0172404	0.0012293								67058-05	K17-133.5	37	2019-10-08	8.76667	3653369000	Heizler, M	DetritalSanidine	24	Heizler01192		localhost	7.875	Ar41 bk val,er = @ 10/14/19 9:15 AM; Average background @ 10/14/19 9:15 AM; Ar40 bk val,er = @ 10/14/19 9:15 AM; Line-segment interpolation @ 10/14/19 9:15 AM; Ar39 bk val,er = @ 10/14/19 9:15 AM; Average background @ 10/14/19 9:15 AM; Ar38 bk val,er = @ 10/14/19 9:15 AM; Average background @ 10/14/19 9:15 AM; Ar37 bk val,er = @ 10/14/19 9:15 AM; Average background @ 10/14/19 9:15 AM; Ar36 bk val…	B:24 DS	ALLLLLAAAAAA	1	Pychron Script	1	Fusions CO2	3	0	0	0	0	30	30	86			0
x	188	3	8.12246	0.0131318	0.8275	1.07416	38.8526	97.0027	27.279	0.0302117	0.0019153								67058-188	K17-133.5	37	2019-10-21	11.1167	3654501000	Heizler, M	DetritalSanidine	24	Heizler01192		localhost	7.875	Ar41 = A, deleting t<30 @ 10/21/19 12:43 PM; Ar40 = L @ 10/21/19 12:43 PM; Ar39 = L @ 10/21/19 12:43 PM; Ar38 = L @ 10/21/19 12:43 PM; Ar37 = L @ 10/21/19 12:43 PM; Ar36 = L @ 10/21/19 12:43 PM; Ar41 bk val,er = @ 10/21/19 12:47 PM; Average background @ 10/21/19 12:47 PM; Ar40 bk val,er = @ 10/21/19 12:47 PM; Line-segment interpolation @ 10/21/19 12:47 PM; Ar39 bk val,er = @ 10/21/19 12:47 PM; Av…	B:24 DS	ALLLLLAAAAAA	1	Pychron Script	1	Fusions CO2	3	0	0	0	0	30	30	196			0
x	92	3	7.9882	0.0186985	0.3291	1.14029	27.2858	98.8014	27.3253	0.0264325	0.0020152								67058-92	K17-133.5	37	2019-10-16	18.85	3654097000	Heizler, M	DetritalSanidine	24	Heizler01192		localhost	7.875	Ar41 = A, deleting t<30 @ 10/17/19 8:30 AM; Ar40 = L @ 10/17/19 8:30 AM; Ar39 = L @ 10/17/19 8:30 AM; Ar38 = L @ 10/17/19 8:30 AM; Ar37 = L @ 10/17/19 8:30 AM; Ar36 = L @ 10/17/19 8:30 AM; Ar41 bk val,er = @ 10/17/19 8:35 AM; Average background @ 10/17/19 8:35 AM; Ar40 bk val,er = @ 10/17/19 8:35 AM; Line-segment interpolation @ 10/17/19 8:35 AM; Ar39 bk val,er = @ 10/17/19 8:35 AM; Average backg…	B:24 DS	ALLLLLAAAAAA	1	Pychron Script	1	Fusions CO2	3	0	0	0	0	30	30	183			0
x	71	3	8.07982	0.0107436	0.5339	1.13956	47.4891	98.0579	27.4298	0.0282318	0.0020152								67058-71	K17-133.5	37	2019-10-16	15.4167	3654084000	Heizler, M	DetritalSanidine	24	Heizler01192		localhost	7.875	Ar41 = A, deleting t<30 @ 10/17/19 8:30 AM; Ar40 = L @ 10/17/19 8:30 AM; Ar39 = L @ 10/17/19 8:30 AM; Ar38 = L @ 10/17/19 8:30 AM; Ar37 = L @ 10/17/19 8:30 AM; Ar36 = L @ 10/17/19 8:30 AM; Ar41 bk val,er = @ 10/17/19 8:35 AM; Average background @ 10/17/19 8:35 AM; Ar40 bk val,er = @ 10/17/19 8:35 AM; Line-segment interpolation @ 10/17/19 8:35 AM; Ar39 bk val,er = @ 10/17/19 8:35 AM; Average backg…	B:24 DS	ALLLLLAAAAAA	1	Pychron Script	1	Fusions CO2	3	0	0	0	0	30	30	161			0
x	102	3	8.08177	0.0115788	0.4982	1.57011	44.0636	98.1897	27.473	0.0234739	0.0020152								67058-102	K17-133.5	37	2019-10-16	20.3167	3654102000	Heizler, M	DetritalSanidine	24	Heizler01192		localhost	7.875	Ar41 = A, deleting t<30 @ 10/17/19 8:30 AM; Ar40 = L @ 10/17/19 8:30 AM; Ar39 = L @ 10/17/19 8:30 AM; Ar38 = L @ 10/17/19 8:30 AM; Ar37 = L @ 10/17/19 8:30 AM; Ar36 = L @ 10/17/19 8:30 AM; Ar41 bk val,er = @ 10/17/19 8:35 AM; Average background @ 10/17/19 8:35 AM; Ar40 bk val,er = @ 10/17/19 8:35 AM; Line-segment interpolation @ 10/17/19 8:35 AM; Ar39 bk val,er = @ 10/17/19 8:35 AM; Average backg…	B:24 DS	ALLLLLAAAAAA	1	Pychron Script	1	Fusions CO2	3	0	0	0	0	30	30	194			0
x	96	3	8.08742	0.0125422	0.3841	0.856141	40.679	98.6092	27.6087	0.0321755	0.0020152								67058-96	K17-133.5	37	2019-10-16	19.25	3654098000	Heizler, M	DetritalSanidine	24	Heizler01192		localhost	7.875	Ar41 = A, deleting t<30 @ 10/17/19 8:30 AM; Ar40 = L @ 10/17/19 8:30 AM; Ar39 = L @ 10/17/19 8:30 AM; Ar38 = L @ 10/17/19 8:30 AM; Ar37 = L @ 10/17/19 8:30 AM; Ar36 = L @ 10/17/19 8:30 AM; Ar41 bk val,er = @ 10/17/19 8:35 AM; Average background @ 10/17/19 8:35 AM; Ar40 bk val,er = @ 10/17/19 8:35 AM; Line-segment interpolation @ 10/17/19 8:35 AM; Ar39 bk val,er = @ 10/17/19 8:35 AM; Average backg…	B:24 DS	ALLLLLAAAAAA	1	Pychron Script	1	Fusions CO2	3	0	0	0	0	30	30	187			0
x	19	3	8.27396	0.0152337	0.9962	2.17944	33.4918	96.4566	27.6288	0.0191971	0.0012293								67058-19	K17-133.5	37	2019-10-08	13.2	3653385000	Heizler, M	DetritalSanidine	24	Heizler01192		localhost	7.875	Ar41 bk val,er = @ 10/14/19 9:15 AM; Average background @ 10/14/19 9:15 AM; Ar40 bk val,er = @ 10/14/19 9:15 AM; Line-segment interpolation @ 10/14/19 9:15 AM; Ar39 bk val,er = @ 10/14/19 9:15 AM; Average background @ 10/14/19 9:15 AM; Ar38 bk val,er = @ 10/14/19 9:15 AM; Average background @ 10/14/19 9:15 AM; Ar37 bk val,er = @ 10/14/19 9:15 AM; Average background @ 10/14/19 9:15 AM; Ar36 bk val…	B:24 DS	ALLLLLAAAAAA	1	Pychron Script	1	Fusions CO2	3	0	0	0	0	30	30	100			0
x	101	3	8.27642	0.0114035	0.9823	1.48531	44.741	96.5038	27.6503	0.0254846	0.0020152								67058-101	K17-133.5	37	2019-10-16	19.8833	3654100000	Heizler, M	DetritalSanidine	24	Heizler01192		localhost	7.875	Ar41 = A, deleting t<30 @ 10/17/19 8:30 AM; Ar40 = L @ 10/17/19 8:30 AM; Ar39 = L @ 10/17/19 8:30 AM; Ar38 = L @ 10/17/19 8:30 AM; Ar37 = L @ 10/17/19 8:30 AM; Ar36 = L @ 10/17/19 8:30 AM; Ar41 bk val,er = @ 10/17/19 8:35 AM; Average background @ 10/17/19 8:35 AM; Ar40 bk val,er = @ 10/17/19 8:35 AM; Line-segment interpolation @ 10/17/19 8:35 AM; Ar39 bk val,er = @ 10/17/19 8:35 AM; Average backg…	B:24 DS	ALLLLLAAAAAA	1	Pychron Script	1	Fusions CO2	3	0	0	0	0	30	30	192			0
x	148	3	8.43304	0.0165968	1.4735	1.00136	30.7411	94.8527	27.6913	0.0377869	0.0019153								67058-148	K17-133.5	37	2019-10-20	15.7	3654431000	Heizler, M	DetritalSanidine	24	Heizler01192		localhost	7.875	Ar41 = A, deleting t<30 @ 10/21/19 12:42 PM; Ar40 = L @ 10/21/19 12:42 PM; Ar39 = L @ 10/21/19 12:42 PM; Ar38 = L @ 10/21/19 12:42 PM; Ar37 = L @ 10/21/19 12:42 PM; Ar36 = L @ 10/21/19 12:42 PM; Ar41 bk val,er = @ 10/21/19 12:46 PM; Average background @ 10/21/19 12:46 PM; Ar40 bk val,er = @ 10/21/19 12:46 PM; Line-segment interpolation @ 10/21/19 12:46 PM; Ar39 bk val,er = @ 10/21/19 12:46 PM; Av…	B:24 DS	ALLLLLAAAAAA	1	Pychron Script	1	Fusions CO2	3	0	0	0	0	30	30	154			0
x	29	3	9.50291	0.0106192	4.9247	0.97165	48.0454	84.6951	27.8614	0.0511232	0.0012293								67058-29	K17-133.5	37	2019-10-08	15.3	3653393000	Heizler, M	DetritalSanidine	24	Heizler01192		localhost	7.875	Ar41 bk val,er = @ 10/14/19 9:15 AM; Average background @ 10/14/19 9:15 AM; Ar40 bk val,er = @ 10/14/19 9:15 AM; Line-segment interpolation @ 10/14/19 9:15 AM; Ar39 bk val,er = @ 10/14/19 9:15 AM; Average background @ 10/14/19 9:15 AM; Ar38 bk val,er = @ 10/14/19 9:15 AM; Average background @ 10/14/19 9:15 AM; Ar37 bk val,er = @ 10/14/19 9:15 AM; Average background @ 10/14/19 9:15 AM; Ar36 bk val…	B:24 DS	ALLLLLAAAAAA	1	Pychron Script	1	Fusions CO2	3	0	0	0	0	30	30	111			0
x	125	3	8.14855	0.0113192	0.2842	0.926041	45.0742	98.9804	27.9197	0.0315233	0.0020152								67058-125	K17-133.5	37	2019-10-16	22.9167	3654111000	Heizler, M	DetritalSanidine	24	Heizler01192		localhost	7.875	Ar41 = A, deleting t<30 @ 10/17/19 8:30 AM; Ar40 = L @ 10/17/19 8:30 AM; Ar39 = L @ 10/17/19 8:30 AM; Ar38 = L @ 10/17/19 8:30 AM; Ar37 = L @ 10/17/19 8:30 AM; Ar36 = L @ 10/17/19 8:30 AM; Ar41 bk val,er = @ 10/17/19 8:35 AM; Average background @ 10/17/19 8:35 AM; Ar40 bk val,er = @ 10/17/19 8:35 AM; Line-segment interpolation @ 10/17/19 2:35 PM; Ar39 bk val,er = @ 10/17/19 8:35 AM; Average backg…	B:24 DS	ALLLLLAAAAAA	1	Pychron Script	1	Fusions CO2	3	0	0	0	0	30	30	218			0
x	30	3	8.14581	0.009226	0.2533	1.24335	55.3007	99.0903	27.9411	0.0241538	0.0012293								67058-30	K17-133.5	37	2019-10-08	15.4333	3653393000	Heizler, M	DetritalSanidine	24	Heizler01192		localhost	7.875	Ar41 bk val,er = @ 10/14/19 9:15 AM; Average background @ 10/14/19 9:15 AM; Ar40 bk val,er = @ 10/14/19 9:15 AM; Line-segment interpolation @ 10/14/19 9:15 AM; Ar39 bk val,er = @ 10/14/19 9:15 AM; Average background @ 10/14/19 9:15 AM; Ar38 bk val,er = @ 10/14/19 9:15 AM; Average background @ 10/14/19 9:15 AM; Ar37 bk val,er = @ 10/14/19 9:15 AM; Average background @ 10/14/19 9:15 AM; Ar36 bk val…	B:24 DS	ALLLLLAAAAAA	1	Pychron Script	1	Fusions CO2	3	0	0	0	0	30	30	112			0
x	108	3	8.15592	0.0074515	0.25	0.793238	68.47	99.1015	27.9786	0.0379438	0.0020152								67058-108	K17-133.5	37	2019-10-16	21.0333	3654105000	Heizler, M	DetritalSanidine	24	Heizler01192		localhost	7.875	Ar41 = A, deleting t<30 @ 10/17/19 8:30 AM; Ar40 = L @ 10/17/19 8:30 AM; Ar39 = L @ 10/17/19 8:30 AM; Ar38 = L @ 10/17/19 8:30 AM; Ar37 = L @ 10/17/19 8:30 AM; Ar36 = L @ 10/17/19 8:30 AM; Ar41 bk val,er = @ 10/17/19 8:35 AM; Average background @ 10/17/19 8:35 AM; Ar40 bk val,er = @ 10/17/19 8:35 AM; Line-segment interpolation @ 10/17/19 8:35 AM; Ar39 bk val,er = @ 10/17/19 8:35 AM; Average backg…	B:24 DS	ALLLLLAAAAAA	1	Pychron Script	1	Fusions CO2	3	0	0	0	0	30	30	200			0
x	91	3	8.1979	0.0077994	0.296	1.36472	65.4158	98.9407	28.0762	0.0229919	0.0020152								67058-91	K17-133.5	37	2019-10-16	18.7333	3654096000	Heizler, M	DetritalSanidine	24	Heizler01192		localhost	7.875	Ar41 = A, deleting t<30 @ 10/17/19 8:30 AM; Ar40 = L @ 10/17/19 8:30 AM; Ar39 = L @ 10/17/19 8:30 AM; Ar38 = L @ 10/17/19 8:30 AM; Ar37 = L @ 10/17/19 8:30 AM; Ar36 = L @ 10/17/19 8:30 AM; Ar41 bk val,er = @ 10/17/19 8:35 AM; Average background @ 10/17/19 8:35 AM; Ar40 bk val,er = @ 10/17/19 8:35 AM; Line-segment interpolation @ 10/17/19 8:35 AM; Ar39 bk val,er = @ 10/17/19 8:35 AM; Average backg…	B:24 DS	ALLLLLAAAAAA	1	Pychron Script	1	Fusions CO2	3	0	0	0	0	30	30	182			0
x	134	3	10.0772	0.0122273	6.6146	1.1355	41.7266	80.6131	28.1192	0.0600629	0.0019153								67058-134	K17-133.5	37	2019-10-20	14.0167	3654425000	Heizler, M	DetritalSanidine	24	Heizler01192		localhost	7.875	Ar41 = A, deleting t<30 @ 10/21/19 12:42 PM; Ar40 = L @ 10/21/19 12:42 PM; Ar39 = L @ 10/21/19 12:42 PM; Ar38 = L @ 10/21/19 12:42 PM; Ar37 = L @ 10/21/19 12:42 PM; Ar36 = L @ 10/21/19 12:42 PM; Ar41 bk val,er = @ 10/21/19 12:46 PM; Average background @ 10/21/19 12:46 PM; Ar40 bk val,er = @ 10/21/19 12:46 PM; Line-segment interpolation @ 10/21/19 12:46 PM; Ar39 bk val,er = @ 10/21/19 12:46 PM; Av…	B:24 DS	ALLLLLAAAAAA	1	Pychron Script	1	Fusions CO2	3	0	0	0	0	30	30	140			0
x	120	3	8.21068	0.007936	0.2754	2.19239	64.2898	99.0164	28.141	0.0165222	0.0020152								67058-120	K17-133.5	37	2019-10-16	22.2833	3654109000	Heizler, M	DetritalSanidine	24	Heizler01192		localhost	7.875	Ar41 = A, deleting t<30 @ 10/17/19 8:30 AM; Ar40 = L @ 10/17/19 8:30 AM; Ar39 = L @ 10/17/19 8:30 AM; Ar38 = L @ 10/17/19 8:30 AM; Ar37 = L @ 10/17/19 8:30 AM; Ar36 = L @ 10/17/19 8:30 AM; Ar41 bk val,er = @ 10/17/19 8:35 AM; Average background @ 10/17/19 8:35 AM; Ar40 bk val,er = @ 10/17/19 8:35 AM; Line-segment interpolation @ 10/17/19 8:35 AM; Ar39 bk val,er = @ 10/17/19 8:35 AM; Average backg…	B:24 DS	ALLLLLAAAAAA	1	Pychron Script	1	Fusions CO2	3	0	0	0	0	30	30	212			0
x	99	3	8.556	0.0210567	1.2201	0.758288	24.23	95.8062	28.3723	0.0423861	0.0020152								67058-99	K17-133.5	37	2019-10-16	19.6833	3654100000	Heizler, M	DetritalSanidine	24	Heizler01192		localhost	7.875	Ar41 = A, deleting t<30 @ 10/17/19 8:30 AM; Ar40 = L @ 10/17/19 8:30 AM; Ar39 = L @ 10/17/19 8:30 AM; Ar38 = L @ 10/17/19 8:30 AM; Ar37 = L @ 10/17/19 8:30 AM; Ar36 = L @ 10/17/19 8:30 AM; Ar41 bk val,er = @ 10/17/19 8:35 AM; Average background @ 10/17/19 8:35 AM; Ar40 bk val,er = @ 10/17/19 8:35 AM; Line-segment interpolation @ 10/17/19 8:35 AM; Ar39 bk val,er = @ 10/17/19 8:35 AM; Average backg…	B:24 DS	ALLLLLAAAAAA	1	Pychron Script	1	Fusions CO2	3	0	0	0	0	30	30	190			0
x	187	3	8.4261	0.0206243	0.6233	0.996654	24.738	97.834	28.5317	0.0350211	0.0019153								67058-187	K17-133.5	37	2019-10-21	11.0167	3654500000	Heizler, M	DetritalSanidine	24	Heizler01192		localhost	7.875	Ar41 = A, deleting t<30 @ 10/21/19 12:43 PM; Ar40 = L @ 10/21/19 12:43 PM; Ar39 = L @ 10/21/19 12:43 PM; Ar38 = L @ 10/21/19 12:43 PM; Ar37 = L @ 10/21/19 12:43 PM; Ar36 = L @ 10/21/19 12:43 PM; Ar41 bk val,er = @ 10/21/19 12:47 PM; Average background @ 10/21/19 12:47 PM; Ar40 bk val,er = @ 10/21/19 12:47 PM; Line-segment interpolation @ 10/21/19 12:47 PM; Ar39 bk val,er = @ 10/21/19 12:47 PM; Av…	B:24 DS	ALLLLLAAAAAA	1	Pychron Script	1	Fusions CO2	3	0	0	0	0	30	30	195			0
x	107	3	8.7009	0.0156394	1.5347	1.39722	32.623	94.8022	28.5489	0.0321716	0.0020152								67058-107	K17-133.5	37	2019-10-16	20.7833	3654104000	Heizler, M	DetritalSanidine	24	Heizler01192		localhost	7.875	Ar41 = A, deleting t<30 @ 10/17/19 8:30 AM; Ar40 = L @ 10/17/19 8:30 AM; Ar39 = L @ 10/17/19 8:30 AM; Ar38 = L @ 10/17/19 8:30 AM; Ar37 = L @ 10/17/19 8:30 AM; Ar36 = L @ 10/17/19 8:30 AM; Ar41 bk val,er = @ 10/17/19 8:35 AM; Average background @ 10/17/19 8:35 AM; Ar40 bk val,er = @ 10/17/19 8:35 AM; Line-segment interpolation @ 10/17/19 8:35 AM; Ar39 bk val,er = @ 10/17/19 8:35 AM; Average backg…	B:24 DS	ALLLLLAAAAAA	1	Pychron Script	1	Fusions CO2	3	0	0	0	0	30	30	199			0
x	195	3	8.3803	0.0224014	0.2846	1.45562	22.7755	99.0181	28.7186	0.0236102	0.0019153								67058-195	K17-133.5	37	2019-10-21	11.7833	3654503000	Heizler, M	DetritalSanidine	24	Heizler01192		localhost	7.875	Ar41 = A, deleting t<30 @ 10/21/19 12:43 PM; Ar40 = L @ 10/21/19 12:43 PM; Ar39 = L @ 10/21/19 12:43 PM; Ar38 = L @ 10/21/19 12:43 PM; Ar37 = L @ 10/21/19 12:43 PM; Ar36 = L @ 10/21/19 12:43 PM; Ar41 bk val,er = @ 10/21/19 12:47 PM; Average background @ 10/21/19 12:47 PM; Ar40 bk val,er = @ 10/21/19 12:47 PM; Line-segment interpolation @ 10/21/19 12:47 PM; Ar39 bk val,er = @ 10/21/19 12:47 PM; Av…	B:24 DS	ALLLLLAAAAAA	1	Pychron Script	1	Fusions CO2	3	0	0	0	0	30	30	203			0
x	85	3	8.73919	0.0266082	1.2622	0.591333	19.1747	95.7566	28.9602	0.0575096	0.0020152								67058-85	K17-133.5	37	2019-10-16	17.1333	3654091000	Heizler, M	DetritalSanidine	24	Heizler01192		localhost	7.875	Ar41 = A, deleting t<30 @ 10/17/19 8:30 AM; Ar40 = L @ 10/17/19 8:30 AM; Ar39 = L @ 10/17/19 8:30 AM; Ar38 = L @ 10/17/19 8:30 AM; Ar37 = L @ 10/17/19 8:30 AM; Ar36 = L @ 10/17/19 8:30 AM; Ar41 bk val,er = @ 10/17/19 8:35 AM; Average background @ 10/17/19 8:35 AM; Ar40 bk val,er = @ 10/17/19 8:35 AM; Line-segment interpolation @ 10/17/19 8:35 AM; Ar39 bk val,er = @ 10/17/19 8:35 AM; Average backg…	B:24 DS	ALLLLLAAAAAA	1	Pychron Script	1	Fusions CO2	3	0	0	0	0	30	30	176			0
x	09	3	8.93472	0.0178848	1.8849	0.755204	28.5272	93.782	28.9972	0.0509129	0.0012293								67058-09	K17-133.5	37	2019-10-08	9.18333	3653371000	Heizler, M	DetritalSanidine	24	Heizler01192		localhost	7.875	Ar41 bk val,er = @ 10/14/19 9:15 AM; Average background @ 10/14/19 9:15 AM; Ar40 bk val,er = @ 10/14/19 9:15 AM; Line-segment interpolation @ 10/14/19 9:15 AM; Ar39 bk val,er = @ 10/14/19 9:15 AM; Average background @ 10/14/19 9:15 AM; Ar38 bk val,er = @ 10/14/19 9:15 AM; Average background @ 10/14/19 9:15 AM; Ar37 bk val,er = @ 10/14/19 9:15 AM; Average background @ 10/14/19 9:15 AM; Ar36 bk val…	B:24 DS	ALLLLLAAAAAA	1	Pychron Script	1	Fusions CO2	3	0	0	0	0	30	30	90			0
x	49	3	8.46155	0.0137888	0.1788	1.12353	37.0013	99.3885	29.1023	0.0287491	0.0012293								67058-49	K17-133.5	37	2019-10-08	18.0333	3653403000	Heizler, M	DetritalSanidine	24	Heizler01192		localhost	7.875	Ar41 bk val,er = @ 10/14/19 9:15 AM; Average background @ 10/14/19 9:15 AM; Ar40 bk val,er = @ 10/14/19 9:15 AM; Line-segment interpolation @ 10/14/19 9:15 AM; Ar39 bk val,er = @ 10/14/19 9:15 AM; Average background @ 10/14/19 9:15 AM; Ar38 bk val,er = @ 10/14/19 9:15 AM; Average background @ 10/14/19 9:15 AM; Ar37 bk val,er = @ 10/14/19 9:15 AM; Average background @ 10/14/19 9:15 AM; Ar36 bk val…	B:24 DS	ALLLLLAAAAAA	1	Pychron Script	1	Fusions CO2	3	0	0	0	0	30	30	131			0
x	74	3	8.51221	0.0179973	0.3486	0.922149	28.3489	98.8069	29.1053	0.036954	0.0020152								67058-74	K17-133.5	37	2019-10-16	15.6667	3654085000	Heizler, M	DetritalSanidine	24	Heizler01192		localhost	7.875	Ar41 = A, deleting t<30 @ 10/17/19 8:30 AM; Ar40 = L @ 10/17/19 8:30 AM; Ar39 = L @ 10/17/19 8:30 AM; Ar38 = L @ 10/17/19 8:30 AM; Ar37 = L @ 10/17/19 8:30 AM; Ar36 = L @ 10/17/19 8:30 AM; Ar41 bk val,er = @ 10/17/19 8:35 AM; Average background @ 10/17/19 8:35 AM; Ar40 bk val,er = @ 10/17/19 8:35 AM; Line-segment interpolation @ 10/17/19 8:35 AM; Ar39 bk val,er = @ 10/17/19 8:35 AM; Average backg…	B:24 DS	ALLLLLAAAAAA	1	Pychron Script	1	Fusions CO2	3	0	0	0	0	30	30	164			0
x	110	3	8.55872	0.0149594	0.4829	1.06054	34.1059	98.347	29.1278	0.0326358	0.0020152								67058-110	K17-133.5	37	2019-10-16	21.2333	3654105000	Heizler, M	DetritalSanidine	24	Heizler01192		localhost	7.875	Ar41 = A, deleting t<30 @ 10/17/19 8:30 AM; Ar40 = L @ 10/17/19 8:30 AM; Ar39 = L @ 10/17/19 8:30 AM; Ar38 = L @ 10/17/19 8:30 AM; Ar37 = L @ 10/17/19 8:30 AM; Ar36 = L @ 10/17/19 8:30 AM; Ar41 bk val,er = @ 10/17/19 8:35 AM; Average background @ 10/17/19 8:35 AM; Ar40 bk val,er = @ 10/17/19 8:35 AM; Line-segment interpolation @ 10/17/19 8:35 AM; Ar39 bk val,er = @ 10/17/19 8:35 AM; Average backg…	B:24 DS	ALLLLLAAAAAA	1	Pychron Script	1	Fusions CO2	3	0	0	0	0	30	30	202			0
x	165	3	8.93262	0.0059862	1.5957	1.18168	85.23	94.7265	29.2798	0.0380318	0.0019153								67058-165	K17-133.5	37	2019-10-20	17.9333	3654439000	Heizler, M	DetritalSanidine	24	Heizler01192		localhost	7.875	Ar41 = A, deleting t<30 @ 10/21/19 12:43 PM; Ar40 = L @ 10/21/19 12:43 PM; Ar39 = L @ 10/21/19 12:43 PM; Ar38 = L @ 10/21/19 12:43 PM; Ar37 = L @ 10/21/19 12:43 PM; Ar36 = L @ 10/21/19 12:43 PM; Ar41 bk val,er = @ 10/21/19 12:47 PM; Average background @ 10/21/19 12:47 PM; Ar40 bk val,er = @ 10/21/19 12:47 PM; Line-segment interpolation @ 10/21/19 12:47 PM; Ar39 bk val,er = @ 10/21/19 12:47 PM; Av…	B:24 DS	ALLLLLAAAAAA	1	Pychron Script	1	Fusions CO2	3	0	0	0	0	30	30	171			0
x	89	3	8.82479	0.0170839	0.8519	1.08374	29.8646	97.163	29.6675	0.0360367	0.0020152								67058-89	K17-133.5	37	2019-10-16	17.4833	3654092000	Heizler, M	DetritalSanidine	24	Heizler01192		localhost	7.875	Ar41 = A, deleting t<30 @ 10/17/19 8:30 AM; Ar40 = L @ 10/17/19 8:30 AM; Ar39 = L @ 10/17/19 8:30 AM; Ar38 = L @ 10/17/19 8:30 AM; Ar37 = L @ 10/17/19 8:30 AM; Ar36 = L @ 10/17/19 8:30 AM; Ar41 bk val,er = @ 10/17/19 8:35 AM; Average background @ 10/17/19 8:35 AM; Ar40 bk val,er = @ 10/17/19 8:35 AM; Line-segment interpolation @ 10/17/19 8:35 AM; Ar39 bk val,er = @ 10/17/19 8:35 AM; Average backg…	B:24 DS	ALLLLLAAAAAA	1	Pychron Script	1	Fusions CO2	3	0	0	0	0	30	30	180			0
x	185	3	9.01335	0.0067238	1.4389	0.316439	75.8803	95.2885	29.7162	0.0999713	0.0019153								67058-185	K17-133.5	37	2019-10-21	10.65	3654499000	Heizler, M	DetritalSanidine	24	Heizler01192		localhost	7.875	Ar41 = A, deleting t<30 @ 10/21/19 12:43 PM; Ar40 = L @ 10/21/19 12:43 PM; Ar39 = L @ 10/21/19 12:43 PM; Ar38 = L @ 10/21/19 12:43 PM; Ar37 = L @ 10/21/19 12:43 PM; Ar36 = L @ 10/21/19 12:43 PM; Ar41 bk val,er = @ 10/21/19 12:47 PM; Average background @ 10/21/19 12:47 PM; Ar40 bk val,er = @ 10/21/19 12:47 PM; Line-segment interpolation @ 10/21/19 12:47 PM; Ar39 bk val,er = @ 10/21/19 12:47 PM; Av…	B:24 DS	ALLLLLAAAAAA	1	Pychron Script	1	Fusions CO2	3	0	0	0	0	30	30	193			0
x	63	3	9.13378	0.0083488	1.8189	1.21898	61.1111	94.1226	29.7446	0.0321612	0.0012293								67058-63	K17-133.5	37	2019-10-08	19.6167	3653408000	Heizler, M	DetritalSanidine	24	Heizler01192		localhost	7.875	Ar41 bk val,er = @ 10/14/19 9:15 AM; Average background @ 10/14/19 9:15 AM; Ar40 bk val,er = @ 10/14/19 9:15 AM; Line-segment interpolation @ 10/14/19 9:15 AM; Ar39 bk val,er = @ 10/14/19 9:15 AM; Average background @ 10/14/19 9:15 AM; Ar38 bk val,er = @ 10/14/19 9:15 AM; Average background @ 10/14/19 9:15 AM; Ar37 bk val,er = @ 10/14/19 9:15 AM; Average background @ 10/14/19 9:15 AM; Ar36 bk val…	B:24 DS	ALLLLLAAAAAA	1	Pychron Script	1	Fusions CO2	3	0	0	0	0	30	30	145			0
x	01	3	8.91263	0.0055793	1.0522	0.966361	91.4459	96.5162	29.7623	0.0295916	0.0012293								67058-01	K17-133.5	37	2019-10-08	8.41667	3653368000	Heizler, M	DetritalSanidine	24	Heizler01192		localhost	7.875	Ar41 bk val,er = @ 10/14/19 9:15 AM; Average background @ 10/14/19 9:15 AM; Ar40 bk val,er = @ 10/14/19 9:15 AM; Line-segment interpolation @ 10/14/19 9:15 AM; Ar39 bk val,er = @ 10/14/19 9:15 AM; Average background @ 10/14/19 9:15 AM; Ar38 bk val,er = @ 10/14/19 9:15 AM; Average background @ 10/14/19 9:15 AM; Ar37 bk val,er = @ 10/14/19 9:15 AM; Average background @ 10/14/19 9:15 AM; Ar36 bk val…	B:24 DS	ALLLLLAAAAAA	1	Pychron Script	1	Fusions CO2	3	0	0	0	0	30	30	82			0
x	170	3	9.60805	0.0076707	3.3972	1.1751	66.5134	89.5583	29.7716	0.0451388	0.0019153								67058-170	K17-133.5	37	2019-10-21	8.21667	3654490000	Heizler, M	DetritalSanidine	24	Heizler01192		localhost	7.875	Ar41 = A, deleting t<30 @ 10/21/19 12:43 PM; Ar40 = L @ 10/21/19 12:43 PM; Ar39 = L @ 10/21/19 12:43 PM; Ar38 = L @ 10/21/19 12:43 PM; Ar37 = L @ 10/21/19 12:43 PM; Ar36 = L @ 10/21/19 12:43 PM; Ar41 bk val,er = @ 10/21/19 12:47 PM; Average background @ 10/21/19 12:47 PM; Ar40 bk val,er = @ 10/21/19 12:47 PM; Line-segment interpolation @ 10/21/19 12:47 PM; Ar39 bk val,er = @ 10/21/19 12:47 PM; Av…	B:24 DS	ALLLLLAAAAAA	1	Pychron Script	1	Fusions CO2	3	0	0	0	0	30	30	178			0
x	18	3	8.9531	0.006117	1.1409	1.01574	83.4076	96.2398	29.8114	0.0343981	0.0012293								67058-18	K17-133.5	37	2019-10-08	13.0833	3653385000	Heizler, M	DetritalSanidine	24	Heizler01192		localhost	7.875	Ar41 bk val,er = @ 10/14/19 9:15 AM; Average background @ 10/14/19 9:15 AM; Ar40 bk val,er = @ 10/14/19 9:15 AM; Line-segment interpolation @ 10/14/19 9:15 AM; Ar39 bk val,er = @ 10/14/19 9:15 AM; Average background @ 10/14/19 9:15 AM; Ar38 bk val,er = @ 10/14/19 9:15 AM; Average background @ 10/14/19 9:15 AM; Ar37 bk val,er = @ 10/14/19 9:15 AM; Average background @ 10/14/19 9:15 AM; Ar36 bk val…	B:24 DS	ALLLLLAAAAAA	1	Pychron Script	1	Fusions CO2	3	0	0	0	0	30	30	99			0
x	42	3	8.84328	0.0088995	0.6405	1.37646	57.3295	97.868	29.9429	0.0250142	0.0012293								67058-42	K17-133.5	37	2019-10-08	16.6333	3653398000	Heizler, M	DetritalSanidine	24	Heizler01192		localhost	7.875	Ar41 bk val,er = @ 10/14/19 9:15 AM; Average background @ 10/14/19 9:15 AM; Ar40 bk val,er = @ 10/14/19 9:15 AM; Line-segment interpolation @ 10/14/19 9:15 AM; Ar39 bk val,er = @ 10/14/19 9:15 AM; Average background @ 10/14/19 9:15 AM; Ar38 bk val,er = @ 10/14/19 9:15 AM; Average background @ 10/14/19 9:15 AM; Ar37 bk val,er = @ 10/14/19 9:15 AM; Average background @ 10/14/19 9:15 AM; Ar36 bk val…	B:24 DS	ALLLLLAAAAAA	1	Pychron Script	1	Fusions CO2	3	0	0	0	0	30	30	124			0
x	177	3	8.87171	0.0147406	0.4159	0.451036	34.6122	98.6284	30.27	0.0660275	0.0019153								67058-177	K17-133.5	37	2019-10-21	9.46667	3654495000	Heizler, M	DetritalSanidine	24	Heizler01192		localhost	7.875	Ar41 = A, deleting t<30 @ 10/21/19 12:43 PM; Ar40 = L @ 10/21/19 12:43 PM; Ar39 = L @ 10/21/19 12:43 PM; Ar38 = L @ 10/21/19 12:43 PM; Ar37 = L @ 10/21/19 12:43 PM; Ar36 = L @ 10/21/19 12:43 PM; Ar41 bk val,er = @ 10/21/19 12:47 PM; Average background @ 10/21/19 12:47 PM; Ar40 bk val,er = @ 10/21/19 12:47 PM; Line-segment interpolation @ 10/21/19 12:47 PM; Ar39 bk val,er = @ 10/21/19 12:47 PM; Av…	B:24 DS	ALLLLLAAAAAA	1	Pychron Script	1	Fusions CO2	3	0	0	0	0	30	30	185			0
x	190	3	9.49471	0.0060992	2.099	0.818176	83.651	93.4726	30.6984	0.0500399	0.0019153								67058-190	K17-133.5	37	2019-10-21	11.3333	3654502000	Heizler, M	DetritalSanidine	24	Heizler01192		localhost	7.875	Ar41 = A, deleting t<30 @ 10/21/19 12:43 PM; Ar40 = L @ 10/21/19 12:43 PM; Ar39 = L @ 10/21/19 12:43 PM; Ar38 = L @ 10/21/19 12:43 PM; Ar37 = L @ 10/21/19 12:43 PM; Ar36 = L @ 10/21/19 12:43 PM; Ar41 bk val,er = @ 10/21/19 12:47 PM; Average background @ 10/21/19 12:47 PM; Ar40 bk val,er = @ 10/21/19 12:47 PM; Line-segment interpolation @ 10/21/19 12:47 PM; Ar39 bk val,er = @ 10/21/19 12:47 PM; Av…	B:24 DS	ALLLLLAAAAAA	1	Pychron Script	1	Fusions CO2	3	0	0	0	0	30	30	198			0
x	178	3	9.27962	0.0294771	0.8607	1.34364	17.3085	97.2848	31.2226	0.0302759	0.0019153								67058-178	K17-133.5	37	2019-10-21	9.56667	3654495000	Heizler, M	DetritalSanidine	24	Heizler01192		localhost	7.875	Ar41 = A, deleting t<30 @ 10/21/19 12:43 PM; Ar40 = L @ 10/21/19 12:43 PM; Ar39 = L @ 10/21/19 12:43 PM; Ar38 = L @ 10/21/19 12:43 PM; Ar37 = L @ 10/21/19 12:43 PM; Ar36 = L @ 10/21/19 12:43 PM; Ar41 bk val,er = @ 10/21/19 12:47 PM; Average background @ 10/21/19 12:47 PM; Ar40 bk val,er = @ 10/21/19 12:47 PM; Line-segment interpolation @ 10/21/19 12:47 PM; Ar39 bk val,er = @ 10/21/19 12:47 PM; Av…	B:24 DS	ALLLLLAAAAAA	1	Pychron Script	1	Fusions CO2	3	0	0	0	0	30	30	186			0
x	157	3	9.51659	0.0126985	0.9008	0.811087	40.1783	97.2137	31.9895	0.0423216	0.0019153								67058-157	K17-133.5	37	2019-10-20	16.8833	3654435000	Heizler, M	DetritalSanidine	24	Heizler01192		localhost	7.875	Ar41 = A, deleting t<30 @ 10/21/19 12:42 PM; Ar40 = L @ 10/21/19 12:42 PM; Ar39 = L @ 10/21/19 12:42 PM; Ar38 = L @ 10/21/19 12:42 PM; Ar37 = L @ 10/21/19 12:42 PM; Ar36 = L @ 10/21/19 12:42 PM; Ar41 bk val,er = @ 10/21/19 12:47 PM; Average background @ 10/21/19 12:47 PM; Ar40 bk val,er = @ 10/21/19 12:47 PM; Line-segment interpolation @ 10/21/19 12:47 PM; Ar39 bk val,er = @ 10/21/19 12:47 PM; Av…	B:24 DS	ALLLLLAAAAAA	1	Pychron Script	1	Fusions CO2	3	0	0	0	0	30	30	163			0
x	174	3	9.46484	0.0119033	0.6849	1.47352	42.8624	97.8718	32.0305	0.0269423	0.0019153								67058-174	K17-133.5	37	2019-10-21	8.78333	3654492000	Heizler, M	DetritalSanidine	24	Heizler01192		localhost	7.875	Ar41 = A, deleting t<30 @ 10/21/19 12:43 PM; Ar40 = L @ 10/21/19 12:43 PM; Ar39 = L @ 10/21/19 12:43 PM; Ar38 = L @ 10/21/19 12:43 PM; Ar37 = L @ 10/21/19 12:43 PM; Ar36 = L @ 10/21/19 12:43 PM; Ar41 bk val,er = @ 10/21/19 12:47 PM; Average background @ 10/21/19 12:47 PM; Ar40 bk val,er = @ 10/21/19 12:47 PM; Line-segment interpolation @ 10/21/19 12:47 PM; Ar39 bk val,er = @ 10/21/19 12:47 PM; Av…	B:24 DS	ALLLLLAAAAAA	1	Pychron Script	1	Fusions CO2	3	0	0	0	0	30	30	182			0
x	140	3	9.68236	0.0122919	1.2286	0.857786	41.5073	96.2604	32.2254	0.0432867	0.0019153								67058-140	K17-133.5	37	2019-10-20	14.6333	3654427000	Heizler, M	DetritalSanidine	24	Heizler01192		localhost	7.875	Ar41 = A, deleting t<30 @ 10/21/19 12:42 PM; Ar40 = L @ 10/21/19 12:42 PM; Ar39 = L @ 10/21/19 12:42 PM; Ar38 = L @ 10/21/19 12:42 PM; Ar37 = L @ 10/21/19 12:42 PM; Ar36 = L @ 10/21/19 12:42 PM; Ar41 bk val,er = @ 10/21/19 12:46 PM; Average background @ 10/21/19 12:46 PM; Ar40 bk val,er = @ 10/21/19 12:46 PM; Line-segment interpolation @ 10/21/19 12:46 PM; Ar39 bk val,er = @ 10/21/19 12:46 PM; Av…	B:24 DS	ALLLLLAAAAAA	1	Pychron Script	1	Fusions CO2	3	0	0	0	0	30	30	146			0
x	146	3	9.72487	0.010647	1.3548	1.5536	47.92	95.8921	32.2429	0.0292907	0.0019153								67058-146	K17-133.5	37	2019-10-20	15.5	3654430000	Heizler, M	DetritalSanidine	24	Heizler01192		localhost	7.875	Ar41 = A, deleting t<30 @ 10/21/19 12:42 PM; Ar40 = L @ 10/21/19 12:42 PM; Ar39 = L @ 10/21/19 12:42 PM; Ar38 = L @ 10/21/19 12:42 PM; Ar37 = L @ 10/21/19 12:42 PM; Ar36 = L @ 10/21/19 12:42 PM; Ar41 bk val,er = @ 10/21/19 12:46 PM; Average background @ 10/21/19 12:46 PM; Ar40 bk val,er = @ 10/21/19 12:46 PM; Line-segment interpolation @ 10/21/19 12:46 PM; Ar39 bk val,er = @ 10/21/19 12:46 PM; Av…	B:24 DS	ALLLLLAAAAAA	1	Pychron Script	1	Fusions CO2	3	0	0	0	0	30	30	152			0
x	61	3	9.4725	0.0079886	0.4648	1.69538	63.8665	98.5566	32.2784	0.0206644	0.0012293								67058-61	K17-133.5	37	2019-10-08	19.3833	3653407000	Heizler, M	DetritalSanidine	24	Heizler01192		localhost	7.875	Ar41 bk val,er = @ 10/14/19 9:15 AM; Average background @ 10/14/19 9:15 AM; Ar40 bk val,er = @ 10/14/19 9:15 AM; Line-segment interpolation @ 10/14/19 9:15 AM; Ar39 bk val,er = @ 10/14/19 9:15 AM; Average background @ 10/14/19 9:15 AM; Ar38 bk val,er = @ 10/14/19 9:15 AM; Average background @ 10/14/19 9:15 AM; Ar37 bk val,er = @ 10/14/19 9:15 AM; Average background @ 10/14/19 9:15 AM; Ar36 bk val…	B:24 DS	ALLLLLAAAAAA	1	Pychron Script	1	Fusions CO2	3	0	0	0	0	30	30	143			0
x	163	3	9.91414	0.0186177	1.615	0.298889	27.4042	95.2021	32.6306	0.110725	0.0019153								67058-163	K17-133.5	37	2019-10-20	17.6	3654438000	Heizler, M	DetritalSanidine	24	Heizler01192		localhost	7.875	Ar41 = A, deleting t<30 @ 10/21/19 12:43 PM; Ar40 = L @ 10/21/19 12:43 PM; Ar39 = L @ 10/21/19 12:43 PM; Ar38 = L @ 10/21/19 12:43 PM; Ar37 = L @ 10/21/19 12:43 PM; Ar36 = L @ 10/21/19 12:43 PM; Ar41 bk val,er = @ 10/21/19 12:47 PM; Average background @ 10/21/19 12:47 PM; Ar40 bk val,er = @ 10/21/19 12:47 PM; Line-segment interpolation @ 10/21/19 12:47 PM; Ar39 bk val,er = @ 10/21/19 12:47 PM; Av…	B:24 DS	ALLLLLAAAAAA	1	Pychron Script	1	Fusions CO2	3	0	0	0	0	30	30	169			0
x	88	3	9.64728	0.0056553	0.4215	4.08217	90.217	98.7134	32.9205	0.0119955	0.0020152								67058-88	K17-133.5	37	2019-10-16	17.3833	3654091000	Heizler, M	DetritalSanidine	24	Heizler01192		localhost	7.875	Ar41 = A, deleting t<30 @ 10/17/19 8:30 AM; Ar40 = L @ 10/17/19 8:30 AM; Ar39 = L @ 10/17/19 8:30 AM; Ar38 = L @ 10/17/19 8:30 AM; Ar37 = L @ 10/17/19 8:30 AM; Ar36 = L @ 10/17/19 8:30 AM; Ar41 bk val,er = @ 10/17/19 8:35 AM; Average background @ 10/17/19 8:35 AM; Ar40 bk val,er = @ 10/17/19 8:35 AM; Line-segment interpolation @ 10/17/19 8:35 AM; Ar39 bk val,er = @ 10/17/19 8:35 AM; Average backg…	B:24 DS	ALLLLLAAAAAA	1	Pychron Script	1	Fusions CO2	3	0	0	0	0	30	30	179			0
x	104	3	9.93254	0.0070314	1.2612	1.5966	72.5608	96.2532	33.0481	0.0309711	0.0020152								67058-104	K17-133.5	37	2019-10-16	20.5167	3654103000	Heizler, M	DetritalSanidine	24	Heizler01192		localhost	7.875	Ar41 = A, deleting t<30 @ 10/17/19 8:30 AM; Ar40 = L @ 10/17/19 8:30 AM; Ar39 = L @ 10/17/19 8:30 AM; Ar38 = L @ 10/17/19 8:30 AM; Ar37 = L @ 10/17/19 8:30 AM; Ar36 = L @ 10/17/19 8:30 AM; Ar41 bk val,er = @ 10/17/19 8:35 AM; Average background @ 10/17/19 8:35 AM; Ar40 bk val,er = @ 10/17/19 8:35 AM; Line-segment interpolation @ 10/17/19 8:35 AM; Ar39 bk val,er = @ 10/17/19 8:35 AM; Average backg…	B:24 DS	ALLLLLAAAAAA	1	Pychron Script	1	Fusions CO2	3	0	0	0	0	30	30	196			0
x	54	3	9.94669	0.0088055	1.1347	2.40544	57.9415	96.636	33.2252	0.0197412	0.0012293								67058-54	K17-133.5	37	2019-10-08	18.5333	3653404000	Heizler, M	DetritalSanidine	24	Heizler01192		localhost	7.875	Ar41 bk val,er = @ 10/14/19 9:15 AM; Average background @ 10/14/19 9:15 AM; Ar40 bk val,er = @ 10/14/19 9:15 AM; Line-segment interpolation @ 10/14/19 9:15 AM; Ar39 bk val,er = @ 10/14/19 9:15 AM; Average background @ 10/14/19 9:15 AM; Ar38 bk val,er = @ 10/14/19 9:15 AM; Average background @ 10/14/19 9:15 AM; Ar37 bk val,er = @ 10/14/19 9:15 AM; Average background @ 10/14/19 9:15 AM; Ar36 bk val…	B:24 DS	ALLLLLAAAAAA	1	Pychron Script	1	Fusions CO2	3	0	0	0	0	30	30	136			0
x	124	3	9.86232	0.0069243	0.7948	1.51304	73.6831	97.6239	33.2796	0.0290986	0.0020152								67058-124	K17-133.5	37	2019-10-16	22.8167	3654111000	Heizler, M	DetritalSanidine	24	Heizler01192		localhost	7.875	Ar41 = A, deleting t<30 @ 10/17/19 8:30 AM; Ar40 = L @ 10/17/19 8:30 AM; Ar39 = L @ 10/17/19 8:30 AM; Ar38 = L @ 10/17/19 8:30 AM; Ar37 = L @ 10/17/19 8:30 AM; Ar36 = L @ 10/17/19 8:30 AM; Ar41 bk val,er = @ 10/17/19 8:35 AM; Average background @ 10/17/19 8:35 AM; Ar40 bk val,er = @ 10/17/19 8:35 AM; Line-segment interpolation @ 10/17/19 8:35 AM; Ar39 bk val,er = @ 10/17/19 8:35 AM; Average backg…	B:24 DS	ALLLLLAAAAAA	1	Pychron Script	1	Fusions CO2	3	0	0	0	0	30	30	217			0
x	100	3	10.1202	0.0058979	1.0878	1.36223	86.506	96.8282	33.866	0.0310759	0.0020152								67058-100	K17-133.5	37	2019-10-16	19.7833	3654100000	Heizler, M	DetritalSanidine	24	Heizler01192		localhost	7.875	Ar41 = A, deleting t<30 @ 10/17/19 8:30 AM; Ar40 = L @ 10/17/19 8:30 AM; Ar39 = L @ 10/17/19 8:30 AM; Ar38 = L @ 10/17/19 8:30 AM; Ar37 = L @ 10/17/19 8:30 AM; Ar36 = L @ 10/17/19 8:30 AM; Ar41 bk val,er = @ 10/17/19 8:35 AM; Average background @ 10/17/19 8:35 AM; Ar40 bk val,er = @ 10/17/19 8:35 AM; Line-segment interpolation @ 10/17/19 8:35 AM; Ar39 bk val,er = @ 10/17/19 8:35 AM; Average backg…	B:24 DS	ALLLLLAAAAAA	1	Pychron Script	1	Fusions CO2	3	0	0	0	0	30	30	191			0
x	67	3	10.0703	0.0095867	0.9045	1.1287	53.22	97.3536	33.8818	0.0327794	0.0020152								67058-67	K17-133.5	37	2019-10-16	14.7667	3654082000	Heizler, M	DetritalSanidine	24	Heizler01192		localhost	7.875	Ar41 = A, deleting t<30 @ 10/17/19 8:30 AM; Ar40 = L @ 10/17/19 8:30 AM; Ar39 = L @ 10/17/19 8:30 AM; Ar38 = L @ 10/17/19 8:30 AM; Ar37 = L @ 10/17/19 8:30 AM; Ar36 = L @ 10/17/19 8:30 AM; Ar41 bk val,er = @ 10/17/19 8:35 AM; Average background @ 10/17/19 8:35 AM; Ar40 bk val,er = @ 10/17/19 8:35 AM; Line-segment interpolation @ 10/17/19 8:35 AM; Ar39 bk val,er = @ 10/17/19 8:35 AM; Average backg…	B:24 DS	ALLLLLAAAAAA	1	Pychron Script	1	Fusions CO2	3	0	0	0	0	30	30	157			0
x	34	3	10.1258	0.0093772	0.9092	1.09979	54.409	97.354	34.0668	0.0337259	0.0012293								67058-34	K17-133.5	37	2019-10-08	15.85	3653395000	Heizler, M	DetritalSanidine	24	Heizler01192		localhost	7.875	Ar41 bk val,er = @ 10/14/19 9:15 AM; Average background @ 10/14/19 9:15 AM; Ar40 bk val,er = @ 10/14/19 9:15 AM; Line-segment interpolation @ 10/14/19 9:15 AM; Ar39 bk val,er = @ 10/14/19 9:15 AM; Average background @ 10/14/19 9:15 AM; Ar38 bk val,er = @ 10/14/19 9:15 AM; Average background @ 10/14/19 9:15 AM; Ar37 bk val,er = @ 10/14/19 9:15 AM; Average background @ 10/14/19 9:15 AM; Ar36 bk val…	B:24 DS	ALLLLLAAAAAA	1	Pychron Script	1	Fusions CO2	3	0	0	0	0	30	30	116			0
x	69	3	10.7055	0.014697	2.83	2.34315	34.7148	92.1994	34.11	0.0293125	0.0020152								67058-69	K17-133.5	37	2019-10-16	15.2333	3654084000	Heizler, M	DetritalSanidine	24	Heizler01192		localhost	7.875	Ar41 = A, deleting t<30 @ 10/17/19 8:30 AM; Ar40 = L @ 10/17/19 8:30 AM; Ar39 = L @ 10/17/19 8:30 AM; Ar38 = L @ 10/17/19 8:30 AM; Ar37 = L @ 10/17/19 8:30 AM; Ar36 = L @ 10/17/19 8:30 AM; Ar41 bk val,er = @ 10/17/19 8:35 AM; Average background @ 10/17/19 8:35 AM; Ar40 bk val,er = @ 10/17/19 8:35 AM; Line-segment interpolation @ 10/17/19 8:35 AM; Ar39 bk val,er = @ 10/17/19 8:35 AM; Average backg…	B:24 DS	ALLLLLAAAAAA	1	Pychron Script	1	Fusions CO2	3	0	0	0	0	30	30	159			0
x	28	3	12.7176	0.0103191	9.564	2.05116	49.4427	77.7837	34.1846	0.0460028	0.0012293								67058-28	K17-133.5	37	2019-10-08	14.8833	3653391000	Heizler, M	DetritalSanidine	24	Heizler01192		localhost	7.875	Ar41 bk val,er = @ 10/14/19 9:15 AM; Average background @ 10/14/19 9:15 AM; Ar40 bk val,er = @ 10/14/19 9:15 AM; Line-segment interpolation @ 10/14/19 9:15 AM; Ar39 bk val,er = @ 10/14/19 9:15 AM; Average background @ 10/14/19 9:15 AM; Ar38 bk val,er = @ 10/14/19 9:15 AM; Average background @ 10/14/19 9:15 AM; Ar37 bk val,er = @ 10/14/19 9:15 AM; Average background @ 10/14/19 9:15 AM; Ar36 bk val…	B:24 DS	ALLLLLAAAAAA	1	Pychron Script	1	Fusions CO2	3	0	0	0	0	30	30	110			0
x	127	3	10.2816	0.009853	1.0651	0.811957	51.7816	96.9465	34.4427	0.0468892	0.0020152								67058-127	K17-133.5	37	2019-10-16	23.5167	3654114000	Heizler, M	DetritalSanidine	24	Heizler01192		localhost	7.875	Ar41 = A, deleting t<30 @ 10/17/19 8:30 AM; Ar40 = L @ 10/17/19 8:30 AM; Ar39 = L @ 10/17/19 8:30 AM; Ar38 = L @ 10/17/19 8:30 AM; Ar37 = L @ 10/17/19 8:30 AM; Ar36 = L @ 10/17/19 8:30 AM; Ar41 bk val,er = @ 10/17/19 8:35 AM; Average background @ 10/17/19 8:35 AM; Ar40 bk val,er = @ 10/17/19 8:35 AM; Line-segment interpolation @ 10/17/19 2:35 PM; Ar39 bk val,er = @ 10/17/19 8:35 AM; Average backg…	B:24 DS	ALLLLLAAAAAA	1	Pychron Script	1	Fusions CO2	3	0	0	0	0	30	30	220			0
x	103	3	10.1796	0.0084735	0.6084	0.839267	60.2117	98.2407	34.5553	0.0432309	0.0020152								67058-103	K17-133.5	37	2019-10-16	20.4167	3654102000	Heizler, M	DetritalSanidine	24	Heizler01192		localhost	7.875	Ar41 = A, deleting t<30 @ 10/17/19 8:30 AM; Ar40 = L @ 10/17/19 8:30 AM; Ar39 = L @ 10/17/19 8:30 AM; Ar38 = L @ 10/17/19 8:30 AM; Ar37 = L @ 10/17/19 8:30 AM; Ar36 = L @ 10/17/19 8:30 AM; Ar41 bk val,er = @ 10/17/19 8:35 AM; Average background @ 10/17/19 8:35 AM; Ar40 bk val,er = @ 10/17/19 8:35 AM; Line-segment interpolation @ 10/17/19 8:35 AM; Ar39 bk val,er = @ 10/17/19 8:35 AM; Average backg…	B:24 DS	ALLLLLAAAAAA	1	Pychron Script	1	Fusions CO2	3	0	0	0	0	30	30	195			0
x	78	3	10.1927	0.0053919	0.5548	1.58932	94.6242	98.3958	34.6532	0.0251623	0.0020152								67058-78	K17-133.5	37	2019-10-16	16.0333	3654087000	Heizler, M	DetritalSanidine	24	Heizler01192		localhost	7.875	Ar41 = A, deleting t<30 @ 10/17/19 8:30 AM; Ar40 = L @ 10/17/19 8:30 AM; Ar39 = L @ 10/17/19 8:30 AM; Ar38 = L @ 10/17/19 8:30 AM; Ar37 = L @ 10/17/19 8:30 AM; Ar36 = L @ 10/17/19 8:30 AM; Ar41 bk val,er = @ 10/17/19 8:35 AM; Average background @ 10/17/19 8:35 AM; Ar40 bk val,er = @ 10/17/19 8:35 AM; Line-segment interpolation @ 10/17/19 8:35 AM; Ar39 bk val,er = @ 10/17/19 8:35 AM; Average backg…	B:24 DS	ALLLLLAAAAAA	1	Pychron Script	1	Fusions CO2	3	0	0	0	0	30	30	168			0
x	138	3	10.3137	0.0072548	0.9446	1.52575	70.3264	97.2991	34.6737	0.0287739	0.0019153								67058-138	K17-133.5	37	2019-10-20	14.4	3654426000	Heizler, M	DetritalSanidine	24	Heizler01192		localhost	7.875	Ar41 = A, deleting t<30 @ 10/21/19 12:42 PM; Ar40 = L @ 10/21/19 12:42 PM; Ar39 = L @ 10/21/19 12:42 PM; Ar38 = L @ 10/21/19 12:42 PM; Ar37 = L @ 10/21/19 12:42 PM; Ar36 = L @ 10/21/19 12:42 PM; Ar41 bk val,er = @ 10/21/19 12:46 PM; Average background @ 10/21/19 12:46 PM; Ar40 bk val,er = @ 10/21/19 12:46 PM; Line-segment interpolation @ 10/21/19 12:46 PM; Ar39 bk val,er = @ 10/21/19 12:46 PM; Av…	B:24 DS	ALLLLLAAAAAA	1	Pychron Script	1	Fusions CO2	3	0	0	0	0	30	30	144			0
x	155	3	10.18	0.0062745	0.4373	2.98602	81.3139	98.7354	34.7289	0.0163786	0.0019153								67058-155	K17-133.5	37	2019-10-20	16.65	3654434000	Heizler, M	DetritalSanidine	24	Heizler01192		localhost	7.875	Ar41 = A, deleting t<30 @ 10/21/19 12:42 PM; Ar40 = L @ 10/21/19 12:42 PM; Ar39 = L @ 10/21/19 12:42 PM; Ar38 = L @ 10/21/19 12:42 PM; Ar37 = L @ 10/21/19 12:42 PM; Ar36 = L @ 10/21/19 12:42 PM; Ar41 bk val,er = @ 10/21/19 12:47 PM; Average background @ 10/21/19 12:47 PM; Ar40 bk val,er = @ 10/21/19 12:47 PM; Line-segment interpolation @ 10/21/19 12:47 PM; Ar39 bk val,er = @ 10/21/19 12:47 PM; Av…	B:24 DS	ALLLLLAAAAAA	1	Pychron Script	1	Fusions CO2	3	0	0	0	0	30	30	161			0
x	151	3	10.2672	0.0067902	0.6358	2.61244	75.1383	98.1754	34.8269	0.0192103	0.0019153								67058-151	K17-133.5	37	2019-10-20	15.9833	3654432000	Heizler, M	DetritalSanidine	24	Heizler01192		localhost	7.875	Ar41 = A, deleting t<30 @ 10/21/19 12:42 PM; Ar40 = L @ 10/21/19 12:42 PM; Ar39 = L @ 10/21/19 12:42 PM; Ar38 = L @ 10/21/19 12:42 PM; Ar37 = L @ 10/21/19 12:42 PM; Ar36 = L @ 10/21/19 12:42 PM; Ar41 bk val,er = @ 10/21/19 12:47 PM; Average background @ 10/21/19 12:47 PM; Ar40 bk val,er = @ 10/21/19 12:47 PM; Line-segment interpolation @ 10/21/19 12:47 PM; Ar39 bk val,er = @ 10/21/19 12:47 PM; Av…	B:24 DS	ALLLLLAAAAAA	1	Pychron Script	1	Fusions CO2	3	0	0	0	0	30	30	157			0
x	97	3	10.4347	0.0059179	0.9736	1.18428	86.2137	97.2474	35.0583	0.0341914	0.0020152								67058-97	K17-133.5	37	2019-10-16	19.35	3654098000	Heizler, M	DetritalSanidine	24	Heizler01192		localhost	7.875	Ar41 = A, deleting t<30 @ 10/17/19 8:30 AM; Ar40 = L @ 10/17/19 8:30 AM; Ar39 = L @ 10/17/19 8:30 AM; Ar38 = L @ 10/17/19 8:30 AM; Ar37 = L @ 10/17/19 8:30 AM; Ar36 = L @ 10/17/19 8:30 AM; Ar41 bk val,er = @ 10/17/19 8:35 AM; Average background @ 10/17/19 8:35 AM; Ar40 bk val,er = @ 10/17/19 8:35 AM; Line-segment interpolation @ 10/17/19 8:35 AM; Ar39 bk val,er = @ 10/17/19 8:35 AM; Average backg…	B:24 DS	ALLLLLAAAAAA	1	Pychron Script	1	Fusions CO2	3	0	0	0	0	30	30	188			0
x	117	3	10.5499	0.008284	1.2114	3.38115	61.5891	96.6131	35.2125	0.0186099	0.0020152								67058-117	K17-133.5	37	2019-10-16	22.0167	3654108000	Heizler, M	DetritalSanidine	24	Heizler01192		localhost	7.875	Ar41 = A, deleting t<30 @ 10/17/19 8:30 AM; Ar40 = L @ 10/17/19 8:30 AM; Ar39 = L @ 10/17/19 8:30 AM; Ar38 = L @ 10/17/19 8:30 AM; Ar37 = L @ 10/17/19 8:30 AM; Ar36 = L @ 10/17/19 8:30 AM; Ar41 bk val,er = @ 10/17/19 8:35 AM; Average background @ 10/17/19 8:35 AM; Ar40 bk val,er = @ 10/17/19 8:35 AM; Line-segment interpolation @ 10/17/19 8:35 AM; Ar39 bk val,er = @ 10/17/19 8:35 AM; Average backg…	B:24 DS	ALLLLLAAAAAA	1	Pychron Script	1	Fusions CO2	3	0	0	0	0	30	30	209			0
x	128	3	10.3083	0.007634	0.3182	2.94303	66.8331	99.0936	35.2887	0.0151404	0.0020152								67058-128	K17-133.5	37	2019-10-16	23.6333	3654114000	Heizler, M	DetritalSanidine	24	Heizler01192		localhost	7.875	Ar41 = A, deleting t<30 @ 10/17/19 8:30 AM; Ar40 = L @ 10/17/19 8:30 AM; Ar39 = L @ 10/17/19 8:30 AM; Ar38 = L @ 10/17/19 8:30 AM; Ar37 = L @ 10/17/19 8:30 AM; Ar36 = L @ 10/17/19 8:30 AM; Ar41 bk val,er = @ 10/17/19 8:35 AM; Average background @ 10/17/19 8:35 AM; Ar40 bk val,er = @ 10/17/19 8:35 AM; Line-segment interpolation @ 10/17/19 2:35 PM; Ar39 bk val,er = @ 10/17/19 8:35 AM; Average backg…	B:24 DS	ALLLLLAAAAAA	1	Pychron Script	1	Fusions CO2	3	0	0	0	0	30	30	221			0
x	168	3	10.4248	0.0119832	0.6373	0.834828	42.5766	98.2026	35.3663	0.0450202	0.0019153								67058-168	K17-133.5	37	2019-10-21	7.31667	3654487000	Heizler, M	DetritalSanidine	24	Heizler01192		localhost	7.875	Ar41 = A, deleting t<30 @ 10/21/19 12:43 PM; Ar40 = L @ 10/21/19 12:43 PM; Ar39 = L @ 10/21/19 12:43 PM; Ar38 = L @ 10/21/19 12:43 PM; Ar37 = L @ 10/21/19 12:43 PM; Ar36 = L @ 10/21/19 12:43 PM; Ar41 bk val,er = @ 10/21/19 12:47 PM; Average background @ 10/21/19 12:47 PM; Ar40 bk val,er = @ 10/21/19 12:47 PM; Line-segment interpolation @ 10/21/19 12:47 PM; Ar39 bk val,er = @ 10/21/19 12:47 PM; Av…	B:24 DS	ALLLLLAAAAAA	1	Pychron Script	1	Fusions CO2	3	0	0	0	0	30	30	175			0
x	136	3	10.4351	0.0085585	0.6175	2.6188	59.6137	98.258	35.4205	0.0187436	0.0019153								67058-136	K17-133.5	37	2019-10-20	14.2	3654426000	Heizler, M	DetritalSanidine	24	Heizler01192		localhost	7.875	Ar41 = A, deleting t<30 @ 10/21/19 12:42 PM; Ar40 = L @ 10/21/19 12:42 PM; Ar39 = L @ 10/21/19 12:42 PM; Ar38 = L @ 10/21/19 12:42 PM; Ar37 = L @ 10/21/19 12:42 PM; Ar36 = L @ 10/21/19 12:42 PM; Ar41 bk val,er = @ 10/21/19 12:46 PM; Average background @ 10/21/19 12:46 PM; Ar40 bk val,er = @ 10/21/19 12:46 PM; Line-segment interpolation @ 10/21/19 12:46 PM; Ar39 bk val,er = @ 10/21/19 12:46 PM; Av…	B:24 DS	ALLLLLAAAAAA	1	Pychron Script	1	Fusions CO2	3	0	0	0	0	30	30	142			0
x	25	3	11.0005	0.0059774	0.8107	1.46624	85.3555	97.8265	37.158	0.0284328	0.0012293								67058-25	K17-133.5	37	2019-10-08	14.5667	3653390000	Heizler, M	DetritalSanidine	24	Heizler01192		localhost	7.875	Ar41 bk val,er = @ 10/14/19 9:15 AM; Average background @ 10/14/19 9:15 AM; Ar40 bk val,er = @ 10/14/19 9:15 AM; Line-segment interpolation @ 10/14/19 9:15 AM; Ar39 bk val,er = @ 10/14/19 9:15 AM; Average background @ 10/14/19 9:15 AM; Ar38 bk val,er = @ 10/14/19 9:15 AM; Average background @ 10/14/19 9:15 AM; Ar37 bk val,er = @ 10/14/19 9:15 AM; Average background @ 10/14/19 9:15 AM; Ar36 bk val…	B:24 DS	ALLLLLAAAAAA	1	Pychron Script	1	Fusions CO2	3	0	0	0	0	30	30	107			0
x	132	3	11.1178	0.0105667	1.0341	0.846481	48.2841	97.2591	37.3347	0.0469306	0.0019153								67058-132	K17-133.5	37	2019-10-20	10.8667	3654414000	Heizler, M	DetritalSanidine	24	Heizler01192		localhost	7.875	Ar41 = A, deleting t<30 @ 10/21/19 12:42 PM; Ar40 = L @ 10/21/19 12:42 PM; Ar39 = L @ 10/21/19 12:42 PM; Ar38 = L @ 10/21/19 12:42 PM; Ar37 = L @ 10/21/19 12:42 PM; Ar36 = L @ 10/21/19 12:42 PM; Ar41 bk val,er = @ 10/21/19 12:46 PM; Average background @ 10/21/19 12:46 PM; Ar40 bk val,er = @ 10/21/19 12:46 PM; Line-segment interpolation @ 10/21/19 12:46 PM; Ar39 bk val,er = @ 10/21/19 12:46 PM; Av…	B:24 DS	ALLLLLAAAAAA	1	Pychron Script	1	Fusions CO2	3	0	0	0	0	30	30	137			0
x	39	3	11.6439	0.0052622	0.6256	0.633473	96.9564	98.4157	39.5421	0.0573534	0.0012293								67058-39	K17-133.5	37	2019-10-08	16.35	3653396000	Heizler, M	DetritalSanidine	24	Heizler01192		localhost	7.875	Ar41 bk val,er = @ 10/14/19 9:15 AM; Average background @ 10/14/19 9:15 AM; Ar40 bk val,er = @ 10/14/19 9:15 AM; Line-segment interpolation @ 10/14/19 9:15 AM; Ar39 bk val,er = @ 10/14/19 9:15 AM; Average background @ 10/14/19 9:15 AM; Ar38 bk val,er = @ 10/14/19 9:15 AM; Average background @ 10/14/19 9:15 AM; Ar37 bk val,er = @ 10/14/19 9:15 AM; Average background @ 10/14/19 9:15 AM; Ar36 bk val…	B:24 DS	ALLLLLAAAAAA	1	Pychron Script	1	Fusions CO2	3	0	0	0	0	30	30	121			0
x	123	3	12.4761	0.0047874	1.1967	0.919667	106.572	97.1687	41.8056	0.0515166	0.0020152								67058-123	K17-133.5	37	2019-10-16	22.7	3654111000	Heizler, M	DetritalSanidine	24	Heizler01192		localhost	7.875	Ar41 = A, deleting t<30 @ 10/17/19 8:30 AM; Ar40 = L @ 10/17/19 8:30 AM; Ar39 = L @ 10/17/19 8:30 AM; Ar38 = L @ 10/17/19 8:30 AM; Ar37 = L @ 10/17/19 8:30 AM; Ar36 = L @ 10/17/19 8:30 AM; Ar41 bk val,er = @ 10/17/19 8:35 AM; Average background @ 10/17/19 8:35 AM; Ar40 bk val,er = @ 10/17/19 8:35 AM; Line-segment interpolation @ 10/17/19 8:35 AM; Ar39 bk val,er = @ 10/17/19 8:35 AM; Average backg…	B:24 DS	ALLLLLAAAAAA	1	Pychron Script	1	Fusions CO2	3	0	0	0	0	30	30	216			0
x	158	3	12.6201	0.0063614	1.5987	2.02319	80.2031	96.2605	41.8917	0.0282469	0.0019153								67058-158	K17-133.5	37	2019-10-20	17.1333	3654436000	Heizler, M	DetritalSanidine	24	Heizler01192		localhost	7.875	Ar41 = A, deleting t<30 @ 10/21/19 12:42 PM; Ar40 = L @ 10/21/19 12:42 PM; Ar39 = L @ 10/21/19 12:42 PM; Ar38 = L @ 10/21/19 12:42 PM; Ar37 = L @ 10/21/19 12:42 PM; Ar36 = L @ 10/21/19 12:42 PM; Ar41 bk val,er = @ 10/21/19 12:47 PM; Average background @ 10/21/19 12:47 PM; Ar40 bk val,er = @ 10/21/19 12:47 PM; Line-segment interpolation @ 10/21/19 12:47 PM; Ar39 bk val,er = @ 10/21/19 12:47 PM; Av…	B:24 DS	ALLLLLAAAAAA	1	Pychron Script	1	Fusions CO2	3	0	0	0	0	30	30	164			0
x	139	3	12.4535	0.0090749	0.7503	1.06711	56.2214	98.2257	42.1794	0.0441214	0.0019153								67058-139	K17-133.5	37	2019-10-20	14.5167	3654427000	Heizler, M	DetritalSanidine	24	Heizler01192		localhost	7.875	Ar41 = A, deleting t<30 @ 10/21/19 12:42 PM; Ar40 = L @ 10/21/19 12:42 PM; Ar39 = L @ 10/21/19 12:42 PM; Ar38 = L @ 10/21/19 12:42 PM; Ar37 = L @ 10/21/19 12:42 PM; Ar36 = L @ 10/21/19 12:42 PM; Ar41 bk val,er = @ 10/21/19 12:46 PM; Average background @ 10/21/19 12:46 PM; Ar40 bk val,er = @ 10/21/19 12:46 PM; Line-segment interpolation @ 10/21/19 12:46 PM; Ar39 bk val,er = @ 10/21/19 12:46 PM; Av…	B:24 DS	ALLLLLAAAAAA	1	Pychron Script	1	Fusions CO2	3	0	0	0	0	30	30	145			0
x	189	3	14.4666	0.0153411	3.406	0.453278	33.2573	93.0516	46.3638	0.198538	0.0019153								67058-189	K17-133.5	37	2019-10-21	11.2167	3654501000	Heizler, M	DetritalSanidine	24	Heizler01192		localhost	7.875	Ar41 = A, deleting t<30 @ 10/21/19 12:43 PM; Ar40 = L @ 10/21/19 12:43 PM; Ar39 = L @ 10/21/19 12:43 PM; Ar38 = L @ 10/21/19 12:43 PM; Ar37 = L @ 10/21/19 12:43 PM; Ar36 = L @ 10/21/19 12:43 PM; Ar41 bk val,er = @ 10/21/19 12:47 PM; Average background @ 10/21/19 12:47 PM; Ar40 bk val,er = @ 10/21/19 12:47 PM; Line-segment interpolation @ 10/21/19 12:47 PM; Ar39 bk val,er = @ 10/21/19 12:47 PM; Av…	B:24 DS	ALLLLLAAAAAA	1	Pychron Script	1	Fusions CO2	3	0	0	0	0	30	30	197			0
x	21	3	15.075	0.0119854	5.158	0.485527	42.5688	89.8961	46.6714	0.14726	0.0012293								67058-21	K17-133.5	37	2019-10-08	13.9833	3653388000	Heizler, M	DetritalSanidine	24	Heizler01192		localhost	7.875	Ar41 bk val,er = @ 10/14/19 9:15 AM; Average background @ 10/14/19 9:15 AM; Ar40 bk val,er = @ 10/14/19 9:15 AM; Line-segment interpolation @ 10/14/19 9:15 AM; Ar39 bk val,er = @ 10/14/19 9:15 AM; Average background @ 10/14/19 9:15 AM; Ar38 bk val,er = @ 10/14/19 9:15 AM; Average background @ 10/14/19 9:15 AM; Ar37 bk val,er = @ 10/14/19 9:15 AM; Average background @ 10/14/19 9:15 AM; Ar36 bk val…	B:24 DS	ALLLLLAAAAAA	1	Pychron Script	1	Fusions CO2	3	0	0	0	0	30	30	103			0
x	75	3	13.8377	0.0157272	0.8	0.514941	32.4409	98.3014	46.8443	0.130953	0.0020152								67058-75	K17-133.5	37	2019-10-16	15.75	3654086000	Heizler, M	DetritalSanidine	24	Heizler01192		localhost	7.875	Ar41 = A, deleting t<30 @ 10/17/19 8:30 AM; Ar40 = L @ 10/17/19 8:30 AM; Ar39 = L @ 10/17/19 8:30 AM; Ar38 = L @ 10/17/19 8:30 AM; Ar37 = L @ 10/17/19 8:30 AM; Ar36 = L @ 10/17/19 8:30 AM; Ar41 bk val,er = @ 10/17/19 8:35 AM; Average background @ 10/17/19 8:35 AM; Ar40 bk val,er = @ 10/17/19 8:35 AM; Line-segment interpolation @ 10/17/19 8:35 AM; Ar39 bk val,er = @ 10/17/19 8:35 AM; Average backg…	B:24 DS	ALLLLLAAAAAA	1	Pychron Script	1	Fusions CO2	3	0	0	0	0	30	30	165			0
x	115	3	14.2867	0.0121193	1.5647	0.306886	42.0985	96.7716	47.6016	0.254643	0.0020152								67058-115	K17-133.5	37	2019-10-16	21.8167	3654107000	Heizler, M	DetritalSanidine	24	Heizler01192		localhost	7.875	Ar41 = A, deleting t<30 @ 10/17/19 8:30 AM; Ar40 = L @ 10/17/19 8:30 AM; Ar39 = L @ 10/17/19 8:30 AM; Ar38 = L @ 10/17/19 8:30 AM; Ar37 = L @ 10/17/19 8:30 AM; Ar36 = L @ 10/17/19 8:30 AM; Ar41 bk val,er = @ 10/17/19 8:35 AM; Average background @ 10/17/19 8:35 AM; Ar40 bk val,er = @ 10/17/19 8:35 AM; Line-segment interpolation @ 10/17/19 8:35 AM; Ar39 bk val,er = @ 10/17/19 8:35 AM; Average backg…	B:24 DS	ALLLLLAAAAAA	1	Pychron Script	1	Fusions CO2	3	0	0	0	0	30	30	207			0
x	172	3	14.6438	0.0246316	2.2972	0.394841	20.7134	95.3787	48.083	0.182706	0.0019153								67058-172	K17-133.5	37	2019-10-21	8.56667	3654492000	Heizler, M	DetritalSanidine	24	Heizler01192		localhost	7.875	Ar41 = A, deleting t<30 @ 10/21/19 12:43 PM; Ar40 = L @ 10/21/19 12:43 PM; Ar39 = L @ 10/21/19 12:43 PM; Ar38 = L @ 10/21/19 12:43 PM; Ar37 = L @ 10/21/19 12:43 PM; Ar36 = L @ 10/21/19 12:43 PM; Ar41 bk val,er = @ 10/21/19 12:47 PM; Average background @ 10/21/19 12:47 PM; Ar40 bk val,er = @ 10/21/19 12:47 PM; Line-segment interpolation @ 10/21/19 12:47 PM; Ar39 bk val,er = @ 10/21/19 12:47 PM; Av…	B:24 DS	ALLLLLAAAAAA	1	Pychron Script	1	Fusions CO2	3	0	0	0	0	30	30	180			0
x	33	3	14.1071	0.012259	0.4659	1.3524	41.6187	99.0313	48.0942	0.0560008	0.0012293								67058-33	K17-133.5	37	2019-10-08	15.7333	3653394000	Heizler, M	DetritalSanidine	24	Heizler01192		localhost	7.875	Ar41 bk val,er = @ 10/14/19 9:15 AM; Average background @ 10/14/19 9:15 AM; Ar40 bk val,er = @ 10/14/19 9:15 AM; Line-segment interpolation @ 10/14/19 9:15 AM; Ar39 bk val,er = @ 10/14/19 9:15 AM; Average background @ 10/14/19 9:15 AM; Ar38 bk val,er = @ 10/14/19 9:15 AM; Average background @ 10/14/19 9:15 AM; Ar37 bk val,er = @ 10/14/19 9:15 AM; Average background @ 10/14/19 9:15 AM; Ar36 bk val…	B:24 DS	ALLLLLAAAAAA	1	Pychron Script	1	Fusions CO2	3	0	0	0	0	30	30	115			0
x	167	3	14.2543	0.0141642	0.4292	1.06043	36.0207	99.1184	48.6317	0.0863972	0.0019153								67058-167	K17-133.5	37	2019-10-21	7.18333	3654487000	Heizler, M	DetritalSanidine	24	Heizler01192		localhost	7.875	Ar41 = A, deleting t<30 @ 10/21/19 12:43 PM; Ar40 = L @ 10/21/19 12:43 PM; Ar39 = L @ 10/21/19 12:43 PM; Ar38 = L @ 10/21/19 12:43 PM; Ar37 = L @ 10/21/19 12:43 PM; Ar36 = L @ 10/21/19 12:43 PM; Ar41 bk val,er = @ 10/21/19 12:47 PM; Average background @ 10/21/19 12:47 PM; Ar40 bk val,er = @ 10/21/19 12:47 PM; Line-segment interpolation @ 10/21/19 12:47 PM; Ar39 bk val,er = @ 10/21/19 12:47 PM; Av…	B:24 DS	ALLLLLAAAAAA	1	Pychron Script	1	Fusions CO2	3	0	0	0	0	30	30	174			0
x	81	3	14.2446	0.0142564	0.3884	1.85487	35.7877	99.2024	48.6395	0.0487871	0.0020152								67058-81	K17-133.5	37	2019-10-16	16.5167	3654088000	Heizler, M	DetritalSanidine	24	Heizler01192		localhost	7.875	Ar41 = A, deleting t<30 @ 10/17/19 8:30 AM; Ar40 = L @ 10/17/19 8:30 AM; Ar39 = L @ 10/17/19 8:30 AM; Ar38 = L @ 10/17/19 8:30 AM; Ar37 = L @ 10/17/19 8:30 AM; Ar36 = L @ 10/17/19 8:30 AM; Ar41 bk val,er = @ 10/17/19 8:35 AM; Average background @ 10/17/19 8:35 AM; Ar40 bk val,er = @ 10/17/19 8:35 AM; Line-segment interpolation @ 10/17/19 8:35 AM; Ar39 bk val,er = @ 10/17/19 8:35 AM; Average backg…	B:24 DS	ALLLLLAAAAAA	1	Pychron Script	1	Fusions CO2	3	0	0	0	0	30	30	171			0
x	182	3	14.6494	0.0473007	1.6888	1.39013	10.7864	96.6196	48.7196	0.0597975	0.0019153								67058-182	K17-133.5	37	2019-10-21	10.2667	3654498000	Heizler, M	DetritalSanidine	24	Heizler01192		localhost	7.875	Ar41 = A, deleting t<30 @ 10/21/19 12:43 PM; Ar40 = L @ 10/21/19 12:43 PM; Ar39 = L @ 10/21/19 12:43 PM; Ar38 = L @ 10/21/19 12:43 PM; Ar37 = L @ 10/21/19 12:43 PM; Ar36 = L @ 10/21/19 12:43 PM; Ar41 bk val,er = @ 10/21/19 12:47 PM; Average background @ 10/21/19 12:47 PM; Ar40 bk val,er = @ 10/21/19 12:47 PM; Line-segment interpolation @ 10/21/19 12:47 PM; Ar39 bk val,er = @ 10/21/19 12:47 PM; Av…	B:24 DS	ALLLLLAAAAAA	1	Pychron Script	1	Fusions CO2	3	0	0	0	0	30	30	190			0
x	143	3	15.5554	0.0056292	2.0924	0.737178	90.6353	96.0285	51.3771	0.137361	0.0019153								67058-143	K17-133.5	37	2019-10-20	15.0167	3654429000	Heizler, M	DetritalSanidine	24	Heizler01192		localhost	7.875	Ar41 = A, deleting t<30 @ 10/21/19 12:42 PM; Ar40 = L @ 10/21/19 12:42 PM; Ar39 = L @ 10/21/19 12:42 PM; Ar38 = L @ 10/21/19 12:42 PM; Ar37 = L @ 10/21/19 12:42 PM; Ar36 = L @ 10/21/19 12:42 PM; Ar41 bk val,er = @ 10/21/19 12:46 PM; Average background @ 10/21/19 12:46 PM; Ar40 bk val,er = @ 10/21/19 12:46 PM; Line-segment interpolation @ 10/21/19 12:46 PM; Ar39 bk val,er = @ 10/21/19 12:46 PM; Av…	B:24 DS	ALLLLLAAAAAA	1	Pychron Script	1	Fusions CO2	3	0	0	0	0	30	30	149			0
x	192	3	15.5816	0.0088855	1.8143	0.966919	57.4198	96.5639	51.7455	0.102813	0.0019153								67058-192	K17-133.5	37	2019-10-21	11.5	3654502000	Heizler, M	DetritalSanidine	24	Heizler01192		localhost	7.875	Ar41 = A, deleting t<30 @ 10/21/19 12:43 PM; Ar40 = L @ 10/21/19 12:43 PM; Ar39 = L @ 10/21/19 12:43 PM; Ar38 = L @ 10/21/19 12:43 PM; Ar37 = L @ 10/21/19 12:43 PM; Ar36 = L @ 10/21/19 12:43 PM; Ar41 bk val,er = @ 10/21/19 12:47 PM; Average background @ 10/21/19 12:47 PM; Ar40 bk val,er = @ 10/21/19 12:47 PM; Line-segment interpolation @ 10/21/19 12:47 PM; Ar39 bk val,er = @ 10/21/19 12:47 PM; Av…	B:24 DS	ALLLLLAAAAAA	1	Pychron Script	1	Fusions CO2	3	0	0	0	0	30	30	200			0
x	44	3	26.9753	0.131427	40.2669	0.00486222	3.88204	55.945	51.903	8.70536	0.0012293								67058-44	K17-133.5	37	2019-10-08	17.0167	3653399000	Heizler, M	DetritalSanidine	24	Heizler01192		localhost	7.875	Ar41 bk val,er = @ 10/14/19 9:15 AM; Average background @ 10/14/19 9:15 AM; Ar40 bk val,er = @ 10/14/19 9:15 AM; Line-segment interpolation @ 10/14/19 9:15 AM; Ar39 bk val,er = @ 10/14/19 9:15 AM; Average background @ 10/14/19 9:15 AM; Ar38 bk val,er = @ 10/14/19 9:15 AM; Average background @ 10/14/19 9:15 AM; Ar37 bk val,er = @ 10/14/19 9:15 AM; Average background @ 10/14/19 9:15 AM; Ar36 bk val…	B:24 DS	ALLLLLAAAAAA	1	Pychron Script	1	Fusions CO2	3	0	0	0	0	30	30	126			0
x	160	3	15.2678	0.0059371	0.5771	1.74592	85.9349	98.8862	51.9204	0.0594446	0.0019153								67058-160	K17-133.5	37	2019-10-20	17.3	3654437000	Heizler, M	DetritalSanidine	24	Heizler01192		localhost	7.875	Ar41 = A, deleting t<30 @ 10/21/19 12:42 PM; Ar40 = L @ 10/21/19 12:42 PM; Ar39 = L @ 10/21/19 12:42 PM; Ar38 = L @ 10/21/19 12:42 PM; Ar37 = L @ 10/21/19 12:42 PM; Ar36 = L @ 10/21/19 12:42 PM; Ar41 bk val,er = @ 10/21/19 12:47 PM; Average background @ 10/21/19 12:47 PM; Ar40 bk val,er = @ 10/21/19 12:47 PM; Line-segment interpolation @ 10/21/19 12:47 PM; Ar39 bk val,er = @ 10/21/19 12:47 PM; Av…	B:24 DS	ALLLLLAAAAAA	1	Pychron Script	1	Fusions CO2	3	0	0	0	0	30	30	166			0
x	20	3	15.302	0.0038041	0.6311	1.84227	134.12	98.7832	51.9815	0.0485995	0.0012293								67058-20	K17-133.5	37	2019-10-08	13.3167	3653386000	Heizler, M	DetritalSanidine	24	Heizler01192		localhost	7.875	Ar41 bk val,er = @ 10/14/19 9:15 AM; Average background @ 10/14/19 9:15 AM; Ar40 bk val,er = @ 10/14/19 9:15 AM; Line-segment interpolation @ 10/14/19 9:15 AM; Ar39 bk val,er = @ 10/14/19 9:15 AM; Average background @ 10/14/19 9:15 AM; Ar38 bk val,er = @ 10/14/19 9:15 AM; Average background @ 10/14/19 9:15 AM; Ar37 bk val,er = @ 10/14/19 9:15 AM; Average background @ 10/14/19 9:15 AM; Ar36 bk val…	B:24 DS	ALLLLLAAAAAA	1	Pychron Script	1	Fusions CO2	3	0	0	0	0	30	30	101			0
x	142	3	16.6704	0.0124892	0.5398	0.820654	40.8516	99.0494	56.7093	0.118968	0.0019153								67058-142	K17-133.5	37	2019-10-20	14.8	3654428000	Heizler, M	DetritalSanidine	24	Heizler01192		localhost	7.875	Ar41 = A, deleting t<30 @ 10/21/19 12:42 PM; Ar40 = L @ 10/21/19 12:42 PM; Ar39 = L @ 10/21/19 12:42 PM; Ar38 = L @ 10/21/19 12:42 PM; Ar37 = L @ 10/21/19 12:42 PM; Ar36 = L @ 10/21/19 12:42 PM; Ar41 bk val,er = @ 10/21/19 12:46 PM; Average background @ 10/21/19 12:46 PM; Ar40 bk val,er = @ 10/21/19 12:46 PM; Line-segment interpolation @ 10/21/19 12:46 PM; Ar39 bk val,er = @ 10/21/19 12:46 PM; Av…	B:24 DS	ALLLLLAAAAAA	1	Pychron Script	1	Fusions CO2	3	0	0	0	0	30	30	148			0
x	129	3	16.9165	0.0074061	1.08	1.01314	68.8897	98.1169	56.9998	0.0565165	0.0019153								67058-129	K17-133.5	37	2019-10-20	9.7	3654409000	Heizler, M	DetritalSanidine	24	Heizler01192		localhost	7.875	Ar41 = A, deleting t<30 @ 10/21/19 12:42 PM; Ar40 = L @ 10/21/19 12:42 PM; Ar39 = L @ 10/21/19 12:42 PM; Ar38 = L @ 10/21/19 12:42 PM; Ar37 = L @ 10/21/19 12:42 PM; Ar36 = L @ 10/21/19 12:42 PM; Ar41 bk val,er = @ 10/21/19 12:46 PM; Average background @ 10/21/19 12:46 PM; Ar40 bk val,er = @ 10/21/19 12:46 PM; Line-segment interpolation @ 10/21/19 12:46 PM; Ar39 bk val,er = @ 10/21/19 12:46 PM; Av…	B:24 DS	ALLLLLAAAAAA	1	Pychron Script	1	Fusions CO2	3	0	0	0	0	30	30	134			0
x	180	3	16.7433	0.0106241	0.3547	1.18735	48.0233	99.3792	57.14	0.0749402	0.0019153								67058-180	K17-133.5	37	2019-10-21	10.0167	3654497000	Heizler, M	DetritalSanidine	24	Heizler01192		localhost	7.875	Ar41 = A, deleting t<30 @ 10/21/19 12:43 PM; Ar40 = L @ 10/21/19 12:43 PM; Ar39 = L @ 10/21/19 12:43 PM; Ar38 = L @ 10/21/19 12:43 PM; Ar37 = L @ 10/21/19 12:43 PM; Ar36 = L @ 10/21/19 12:43 PM; Ar41 bk val,er = @ 10/21/19 12:47 PM; Average background @ 10/21/19 12:47 PM; Ar40 bk val,er = @ 10/21/19 12:47 PM; Line-segment interpolation @ 10/21/19 12:47 PM; Ar39 bk val,er = @ 10/21/19 12:47 PM; Av…	B:24 DS	ALLLLLAAAAAA	1	Pychron Script	1	Fusions CO2	3	0	0	0	0	30	30	188			0
x	35	3	17.6588	0.0079878	0.7603	0.998361	63.8729	98.7316	59.8274	0.0875009	0.0012293								67058-35	K17-133.5	37	2019-10-08	15.95	3653395000	Heizler, M	DetritalSanidine	24	Heizler01192		localhost	7.875	Ar41 bk val,er = @ 10/14/19 9:15 AM; Average background @ 10/14/19 9:15 AM; Ar40 bk val,er = @ 10/14/19 9:15 AM; Line-segment interpolation @ 10/14/19 9:15 AM; Ar39 bk val,er = @ 10/14/19 9:15 AM; Average background @ 10/14/19 9:15 AM; Ar38 bk val,er = @ 10/14/19 9:15 AM; Average background @ 10/14/19 9:15 AM; Ar37 bk val,er = @ 10/14/19 9:15 AM; Average background @ 10/14/19 9:15 AM; Ar36 bk val…	B:24 DS	ALLLLLAAAAAA	1	Pychron Script	1	Fusions CO2	3	0	0	0	0	30	30	117			0
x	06	3	18.0014	0.0028241	0.8697	0.930669	180.661	98.5737	60.8729	0.100952	0.0012293								67058-06	K17-133.5	37	2019-10-08	8.86667	3653370000	Heizler, M	DetritalSanidine	24	Heizler01192		localhost	7.875	Ar41 bk val,er = @ 10/14/19 9:15 AM; Average background @ 10/14/19 9:15 AM; Ar40 bk val,er = @ 10/14/19 9:15 AM; Line-segment interpolation @ 10/14/19 9:15 AM; Ar39 bk val,er = @ 10/14/19 9:15 AM; Average background @ 10/14/19 9:15 AM; Ar38 bk val,er = @ 10/14/19 9:15 AM; Average background @ 10/14/19 9:15 AM; Ar37 bk val,er = @ 10/14/19 9:15 AM; Average background @ 10/14/19 9:15 AM; Ar36 bk val…	B:24 DS	ALLLLLAAAAAA	1	Pychron Script	1	Fusions CO2	3	0	0	0	0	30	30	87			0
x	22	3	18.1914	0.0052251	0.6656	1.30953	97.6448	98.9211	61.718	0.0741124	0.0012293								67058-22	K17-133.5	37	2019-10-08	14.0833	3653388000	Heizler, M	DetritalSanidine	24	Heizler01192		localhost	7.875	Ar41 bk val,er = @ 10/14/19 9:15 AM; Average background @ 10/14/19 9:15 AM; Ar40 bk val,er = @ 10/14/19 9:15 AM; Line-segment interpolation @ 10/14/19 9:15 AM; Ar39 bk val,er = @ 10/14/19 9:15 AM; Average background @ 10/14/19 9:15 AM; Ar38 bk val,er = @ 10/14/19 9:15 AM; Average background @ 10/14/19 9:15 AM; Ar37 bk val,er = @ 10/14/19 9:15 AM; Average background @ 10/14/19 9:15 AM; Ar36 bk val…	B:24 DS	ALLLLLAAAAAA	1	Pychron Script	1	Fusions CO2	3	0	0	0	0	30	30	104			0
x	145	3	68.5439	1.23196	167.583	0.00372296	0.41414	27.9089	65.5939	19.06	0.0019153								67058-145	K17-133.5	37	2019-10-20	15.2333	3654429000	Heizler, M	DetritalSanidine	24	Heizler01192		localhost	7.875	Ar41 = A, deleting t<30 @ 10/21/19 12:42 PM; Ar40 = L @ 10/21/19 12:42 PM; Ar39 = L @ 10/21/19 12:42 PM; Ar38 = L @ 10/21/19 12:42 PM; Ar37 = L @ 10/21/19 12:42 PM; Ar36 = L @ 10/21/19 12:42 PM; Ar41 bk val,er = @ 10/21/19 12:46 PM; Average background @ 10/21/19 12:46 PM; Ar40 bk val,er = @ 10/21/19 12:46 PM; Line-segment interpolation @ 10/21/19 12:46 PM; Ar39 bk val,er = @ 10/21/19 12:46 PM; Av…	B:24 DS	ALLLLLAAAAAA	1	Pychron Script	1	Fusions CO2	3	0	0	0	0	30	30	151			0
x	23	3	20.7439	0.0037018	1.1293	0.760299	137.826	98.3929	69.8459	0.141483	0.0012293								67058-23	K17-133.5	37	2019-10-08	14.1833	3653389000	Heizler, M	DetritalSanidine	24	Heizler01192		localhost	7.875	Ar41 bk val,er = @ 10/14/19 9:15 AM; Average background @ 10/14/19 9:15 AM; Ar40 bk val,er = @ 10/14/19 9:15 AM; Line-segment interpolation @ 10/14/19 9:15 AM; Ar39 bk val,er = @ 10/14/19 9:15 AM; Average background @ 10/14/19 9:15 AM; Ar38 bk val,er = @ 10/14/19 9:15 AM; Average background @ 10/14/19 9:15 AM; Ar37 bk val,er = @ 10/14/19 9:15 AM; Average background @ 10/14/19 9:15 AM; Ar36 bk val…	B:24 DS	ALLLLLAAAAAA	1	Pychron Script	1	Fusions CO2	3	0	0	0	0	30	30	105			0
x	144	3	21.6205	0.0070766	2.0939	1.07106	72.0973	97.1408	71.8319	0.10848	0.0019153								67058-144	K17-133.5	37	2019-10-20	15.1167	3654429000	Heizler, M	DetritalSanidine	24	Heizler01192		localhost	7.875	Ar41 = A, deleting t<30 @ 10/21/19 12:42 PM; Ar40 = L @ 10/21/19 12:42 PM; Ar39 = L @ 10/21/19 12:42 PM; Ar38 = L @ 10/21/19 12:42 PM; Ar37 = L @ 10/21/19 12:42 PM; Ar36 = L @ 10/21/19 12:42 PM; Ar41 bk val,er = @ 10/21/19 12:46 PM; Average background @ 10/21/19 12:46 PM; Ar40 bk val,er = @ 10/21/19 12:46 PM; Line-segment interpolation @ 10/21/19 12:46 PM; Ar39 bk val,er = @ 10/21/19 12:46 PM; Av…	B:24 DS	ALLLLLAAAAAA	1	Pychron Script	1	Fusions CO2	3	0	0	0	0	30	30	150			0
x	106	3	21.284	0.0116468	0.3157	0.989641	43.8064	99.5662	72.4673	0.1191	0.0020152								67058-106	K17-133.5	37	2019-10-16	20.6667	3654103000	Heizler, M	DetritalSanidine	24	Heizler01192		localhost	7.875	Ar41 = A, deleting t<30 @ 10/17/19 8:30 AM; Ar40 = L @ 10/17/19 8:30 AM; Ar39 = L @ 10/17/19 8:30 AM; Ar38 = L @ 10/17/19 8:30 AM; Ar37 = L @ 10/17/19 8:30 AM; Ar36 = L @ 10/17/19 8:30 AM; Ar41 bk val,er = @ 10/17/19 8:35 AM; Average background @ 10/17/19 8:35 AM; Ar40 bk val,er = @ 10/17/19 8:35 AM; Line-segment interpolation @ 10/17/19 8:35 AM; Ar39 bk val,er = @ 10/17/19 8:35 AM; Average backg…	B:24 DS	ALLLLLAAAAAA	1	Pychron Script	1	Fusions CO2	3	0	0	0	0	30	30	198			0
x	46	3	21.8774	5.18e-05	2.0891	1.42501	9849.5	97.1782	72.6961	0.0860666	0.0012293								67058-46	K17-133.5	37	2019-10-08	17.2167	3653400000	Heizler, M	DetritalSanidine	24	Heizler01192		localhost	7.875	Ar41 bk val,er = @ 10/14/19 9:15 AM; Average background @ 10/14/19 9:15 AM; Ar40 bk val,er = @ 10/14/19 9:15 AM; Line-segment interpolation @ 10/14/19 9:15 AM; Ar39 bk val,er = @ 10/14/19 9:15 AM; Average background @ 10/14/19 9:15 AM; Ar38 bk val,er = @ 10/14/19 9:15 AM; Average background @ 10/14/19 9:15 AM; Ar37 bk val,er = @ 10/14/19 9:15 AM; Average background @ 10/14/19 9:15 AM; Ar36 bk val…	B:24 DS	ALLLLLAAAAAA	1	Pychron Script	1	Fusions CO2	3	0	0	0	0	30	30	128			0
x	68	3	21.7206	0.008396	0.9704	1.35563	60.7675	98.683	73.281	0.0716988	0.0020152								67058-68	K17-133.5	37	2019-10-16	15	3654083000	Heizler, M	DetritalSanidine	24	Heizler01192		localhost	7.875	Ar41 = A, deleting t<30 @ 10/17/19 8:30 AM; Ar40 = L @ 10/17/19 8:30 AM; Ar39 = L @ 10/17/19 8:30 AM; Ar38 = L @ 10/17/19 8:30 AM; Ar37 = L @ 10/17/19 8:30 AM; Ar36 = L @ 10/17/19 8:30 AM; Ar41 bk val,er = @ 10/17/19 8:35 AM; Average background @ 10/17/19 8:35 AM; Ar40 bk val,er = @ 10/17/19 8:35 AM; Line-segment interpolation @ 10/17/19 8:35 AM; Ar39 bk val,er = @ 10/17/19 8:35 AM; Average backg…	B:24 DS	ALLLLLAAAAAA	1	Pychron Script	1	Fusions CO2	3	0	0	0	0	30	30	158			0
x	152	3	22.8561	0.0093359	0.5794	1.04774	54.6497	99.2543	77.4695	0.12447	0.0019153								67058-152	K17-133.5	37	2019-10-20	16.0833	3654432000	Heizler, M	DetritalSanidine	24	Heizler01192		localhost	7.875	Ar41 = A, deleting t<30 @ 10/21/19 12:42 PM; Ar40 = L @ 10/21/19 12:42 PM; Ar39 = L @ 10/21/19 12:42 PM; Ar38 = L @ 10/21/19 12:42 PM; Ar37 = L @ 10/21/19 12:42 PM; Ar36 = L @ 10/21/19 12:42 PM; Ar41 bk val,er = @ 10/21/19 12:47 PM; Average background @ 10/21/19 12:47 PM; Ar40 bk val,er = @ 10/21/19 12:47 PM; Line-segment interpolation @ 10/21/19 12:47 PM; Ar39 bk val,er = @ 10/21/19 12:47 PM; Av…	B:24 DS	ALLLLLAAAAAA	1	Pychron Script	1	Fusions CO2	3	0	0	0	0	30	30	158			0
x	119	3	24.0664	0.0096009	0.5032	0.908666	53.1413	99.3854	81.5868	0.130249	0.0020152								67058-119	K17-133.5	37	2019-10-16	22.1833	3654109000	Heizler, M	DetritalSanidine	24	Heizler01192		localhost	7.875	Ar41 = A, deleting t<30 @ 10/17/19 8:30 AM; Ar40 = L @ 10/17/19 8:30 AM; Ar39 = L @ 10/17/19 8:30 AM; Ar38 = L @ 10/17/19 8:30 AM; Ar37 = L @ 10/17/19 8:30 AM; Ar36 = L @ 10/17/19 8:30 AM; Ar41 bk val,er = @ 10/17/19 8:35 AM; Average background @ 10/17/19 8:35 AM; Ar40 bk val,er = @ 10/17/19 8:35 AM; Line-segment interpolation @ 10/17/19 8:35 AM; Ar39 bk val,er = @ 10/17/19 8:35 AM; Average backg…	B:24 DS	ALLLLLAAAAAA	1	Pychron Script	1	Fusions CO2	3	0	0	0	0	30	30	211			0
x	70	3	24.1183	0.008023	0.6052	1.29629	63.5927	99.2613	81.659	0.108621	0.0020152								67058-70	K17-133.5	37	2019-10-16	15.3167	3654084000	Heizler, M	DetritalSanidine	24	Heizler01192		localhost	7.875	Ar41 = A, deleting t<30 @ 10/17/19 8:30 AM; Ar40 = L @ 10/17/19 8:30 AM; Ar39 = L @ 10/17/19 8:30 AM; Ar38 = L @ 10/17/19 8:30 AM; Ar37 = L @ 10/17/19 8:30 AM; Ar36 = L @ 10/17/19 8:30 AM; Ar41 bk val,er = @ 10/17/19 8:35 AM; Average background @ 10/17/19 8:35 AM; Ar40 bk val,er = @ 10/17/19 8:35 AM; Line-segment interpolation @ 10/17/19 8:35 AM; Ar39 bk val,er = @ 10/17/19 8:35 AM; Average backg…	B:24 DS	ALLLLLAAAAAA	1	Pychron Script	1	Fusions CO2	3	0	0	0	0	30	30	160			0
x	166	3	25.9457	0.0395812	2.244	0.71295	12.8901	97.457	86.1448	0.21107	0.0019153								67058-166	K17-133.5	37	2019-10-20	18.0333	3654439000	Heizler, M	DetritalSanidine	24	Heizler01192		localhost	7.875	Ar41 = A, deleting t<30 @ 10/21/19 12:43 PM; Ar40 = L @ 10/21/19 12:43 PM; Ar39 = L @ 10/21/19 12:43 PM; Ar38 = L @ 10/21/19 12:43 PM; Ar37 = L @ 10/21/19 12:43 PM; Ar36 = L @ 10/21/19 12:43 PM; Ar41 bk val,er = @ 10/21/19 12:47 PM; Average background @ 10/21/19 12:47 PM; Ar40 bk val,er = @ 10/21/19 12:47 PM; Line-segment interpolation @ 10/21/19 12:47 PM; Ar39 bk val,er = @ 10/21/19 12:47 PM; Av…	B:24 DS	ALLLLLAAAAAA	1	Pychron Script	1	Fusions CO2	3	0	0	0	0	30	30	172			0
x	26	3	43.0021	0.0065322	1.0378	1.52361	78.106	99.2881	143.183	0.129856	0.0012293								67058-26	K17-133.5	37	2019-10-08	14.6667	3653390000	Heizler, M	DetritalSanidine	24	Heizler01192		localhost	7.875	Ar41 bk val,er = @ 10/14/19 9:15 AM; Average background @ 10/14/19 9:15 AM; Ar40 bk val,er = @ 10/14/19 9:15 AM; Line-segment interpolation @ 10/14/19 9:15 AM; Ar39 bk val,er = @ 10/14/19 9:15 AM; Average background @ 10/14/19 9:15 AM; Ar38 bk val,er = @ 10/14/19 9:15 AM; Average background @ 10/14/19 9:15 AM; Ar37 bk val,er = @ 10/14/19 9:15 AM; Average background @ 10/14/19 9:15 AM; Ar36 bk val…	B:24 DS	ALLLLLAAAAAA	1	Pychron Script	1	Fusions CO2	3	0	0	0	0	30	30	108			0
x	48	3	48.6281	0.0084626	0.8065	0.400484	60.2893	99.5114	161.461	0.475042	0.0012293								67058-48	K17-133.5	37	2019-10-08	17.5667	3653401000	Heizler, M	DetritalSanidine	24	Heizler01192		localhost	7.875	Ar41 bk val,er = @ 10/14/19 9:15 AM; Average background @ 10/14/19 9:15 AM; Ar40 bk val,er = @ 10/14/19 9:15 AM; Line-segment interpolation @ 10/14/19 9:15 AM; Ar39 bk val,er = @ 10/14/19 9:15 AM; Average background @ 10/14/19 9:15 AM; Ar38 bk val,er = @ 10/14/19 9:15 AM; Average background @ 10/14/19 9:15 AM; Ar37 bk val,er = @ 10/14/19 9:15 AM; Average background @ 10/14/19 9:15 AM; Ar36 bk val…	B:24 DS	ALLLLLAAAAAA	1	Pychron Script	1	Fusions CO2	3	0	0	0	0	30	30	130			0
x	55	3	49.3983	0.0173123	2.7603	0.80686	29.4706	98.3516	162.08	0.326964	0.0012293								67058-55	K17-133.5	37	2019-10-08	18.6333	3653405000	Heizler, M	DetritalSanidine	24	Heizler01192		localhost	7.875	Ar41 bk val,er = @ 10/14/19 9:15 AM; Average background @ 10/14/19 9:15 AM; Ar40 bk val,er = @ 10/14/19 9:15 AM; Line-segment interpolation @ 10/14/19 9:15 AM; Ar39 bk val,er = @ 10/14/19 9:15 AM; Average background @ 10/14/19 9:15 AM; Ar38 bk val,er = @ 10/14/19 9:15 AM; Average background @ 10/14/19 9:15 AM; Ar37 bk val,er = @ 10/14/19 9:15 AM; Average background @ 10/14/19 9:15 AM; Ar36 bk val…	B:24 DS	ALLLLLAAAAAA	1	Pychron Script	1	Fusions CO2	3	0	0	0	0	30	30	137			0
x	98	3	49.2548	0.0147786	1.7776	0.928029	34.5232	98.936	162.548	0.285813	0.0020152								67058-98	K17-133.5	37	2019-10-16	19.5667	3654099000	Heizler, M	DetritalSanidine	24	Heizler01192		localhost	7.875	Ar41 = A, deleting t<30 @ 10/17/19 8:30 AM; Ar40 = L @ 10/17/19 8:30 AM; Ar39 = L @ 10/17/19 8:30 AM; Ar38 = L @ 10/17/19 8:30 AM; Ar37 = L @ 10/17/19 8:30 AM; Ar36 = L @ 10/17/19 8:30 AM; Ar41 bk val,er = @ 10/17/19 8:35 AM; Average background @ 10/17/19 8:35 AM; Ar40 bk val,er = @ 10/17/19 8:35 AM; Line-segment interpolation @ 10/17/19 8:35 AM; Ar39 bk val,er = @ 10/17/19 8:35 AM; Average backg…	B:24 DS	ALLLLLAAAAAA	1	Pychron Script	1	Fusions CO2	3	0	0	0	0	30	30	189			0
x	32	3	49.1799	0.0084801	1.1532	1.14881	60.1649	99.3085	162.895	0.155456	0.0012293								67058-32	K17-133.5	37	2019-10-08	15.65	3653394000	Heizler, M	DetritalSanidine	24	Heizler01192		localhost	7.875	Ar41 bk val,er = @ 10/14/19 9:15 AM; Average background @ 10/14/19 9:15 AM; Ar40 bk val,er = @ 10/14/19 9:15 AM; Line-segment interpolation @ 10/14/19 9:15 AM; Ar39 bk val,er = @ 10/14/19 9:15 AM; Average background @ 10/14/19 9:15 AM; Ar38 bk val,er = @ 10/14/19 9:15 AM; Average background @ 10/14/19 9:15 AM; Ar37 bk val,er = @ 10/14/19 9:15 AM; Average background @ 10/14/19 9:15 AM; Ar36 bk val…	B:24 DS	ALLLLLAAAAAA	1	Pychron Script	1	Fusions CO2	3	0	0	0	0	30	30	114			0
x	37	3	49.5112	0.0141763	1.1225	2.2087	35.9899	99.3324	163.983	0.321438	0.0012293								67058-37	K17-133.5	37	2019-10-08	16.1333	3653396000	Heizler, M	DetritalSanidine	24	Heizler01192		localhost	7.875	Ar41 bk val,er = @ 10/14/19 9:15 AM; Average background @ 10/14/19 9:15 AM; Ar40 bk val,er = @ 10/14/19 9:15 AM; Line-segment interpolation @ 10/14/19 9:15 AM; Ar39 bk val,er = @ 10/14/19 9:15 AM; Average background @ 10/14/19 9:15 AM; Ar38 bk val,er = @ 10/14/19 9:15 AM; Average background @ 10/14/19 9:15 AM; Ar37 bk val,er = @ 10/14/19 9:15 AM; Average background @ 10/14/19 9:15 AM; Ar36 bk val…	B:24 DS	ALLLLLAAAAAA	1	Pychron Script	1	Fusions CO2	3	0	0	0	0	30	30	119			0
x	183	3	49.5876	0.0137832	1.1775	1.12932	37.0164	99.3006	164.175	0.201196	0.0019153								67058-183	K17-133.5	37	2019-10-21	10.3667	3654498000	Heizler, M	DetritalSanidine	24	Heizler01192		localhost	7.875	Ar41 = A, deleting t<30 @ 10/21/19 12:43 PM; Ar40 = L @ 10/21/19 12:43 PM; Ar39 = L @ 10/21/19 12:43 PM; Ar38 = L @ 10/21/19 12:43 PM; Ar37 = L @ 10/21/19 12:43 PM; Ar36 = L @ 10/21/19 12:43 PM; Ar41 bk val,er = @ 10/21/19 12:47 PM; Average background @ 10/21/19 12:47 PM; Ar40 bk val,er = @ 10/21/19 12:47 PM; Line-segment interpolation @ 10/21/19 12:47 PM; Ar39 bk val,er = @ 10/21/19 12:47 PM; Av…	B:24 DS	ALLLLLAAAAAA	1	Pychron Script	1	Fusions CO2	3	0	0	0	0	30	30	191			0
x	105	3	49.8082	0.0145585	0.9346	1.59209	35.0451	99.448	165.108	0.448647	0.0020152								67058-105	K17-133.5	37	2019-10-16	20.5833	3654103000	Heizler, M	DetritalSanidine	24	Heizler01192		localhost	7.875	Ar41 = A, deleting t<30 @ 10/17/19 8:30 AM; Ar40 = L @ 10/17/19 8:30 AM; Ar39 = L @ 10/17/19 8:30 AM; Ar38 = L @ 10/17/19 8:30 AM; Ar37 = L @ 10/17/19 8:30 AM; Ar36 = L @ 10/17/19 8:30 AM; Ar41 bk val,er = @ 10/17/19 8:35 AM; Average background @ 10/17/19 8:35 AM; Ar40 bk val,er = @ 10/17/19 8:35 AM; Line-segment interpolation @ 10/17/19 8:35 AM; Ar39 bk val,er = @ 10/17/19 8:35 AM; Average backg…	B:24 DS	ALLLLLAAAAAA	1	Pychron Script	1	Fusions CO2	3	0	0	0	0	30	30	197			0
x	10	3	50.7636	0.0035463	2.5094	0.409051	143.869	98.5398	166.665	0.417058	0.0012293								67058-10	K17-133.5	37	2019-10-08	9.26667	3653371000	Heizler, M	DetritalSanidine	24	Heizler01192		localhost	7.875	Ar41 bk val,er = @ 10/14/19 9:15 AM; Average background @ 10/14/19 9:15 AM; Ar40 bk val,er = @ 10/14/19 9:15 AM; Line-segment interpolation @ 10/14/19 9:15 AM; Ar39 bk val,er = @ 10/14/19 9:15 AM; Average background @ 10/14/19 9:15 AM; Ar38 bk val,er = @ 10/14/19 9:15 AM; Average background @ 10/14/19 9:15 AM; Ar37 bk val,er = @ 10/14/19 9:15 AM; Average background @ 10/14/19 9:15 AM; Ar36 bk val…	B:24 DS	ALLLLLAAAAAA	1	Pychron Script	1	Fusions CO2	3	0	0	0	0	30	30	91			0
x	58	3	51.2642	0.0107146	3.3199	0.826433	47.6176	98.088	167.499	0.332383	0.0012293								67058-58	K17-133.5	37	2019-10-08	18.9333	3653406000	Heizler, M	DetritalSanidine	24	Heizler01192		localhost	7.875	Ar41 bk val,er = @ 10/14/19 9:15 AM; Average background @ 10/14/19 9:15 AM; Ar40 bk val,er = @ 10/14/19 9:15 AM; Line-segment interpolation @ 10/14/19 9:15 AM; Ar39 bk val,er = @ 10/14/19 9:15 AM; Average background @ 10/14/19 9:15 AM; Ar38 bk val,er = @ 10/14/19 9:15 AM; Average background @ 10/14/19 9:15 AM; Ar37 bk val,er = @ 10/14/19 9:15 AM; Average background @ 10/14/19 9:15 AM; Ar36 bk val…	B:24 DS	ALLLLLAAAAAA	1	Pychron Script	1	Fusions CO2	3	0	0	0	0	30	30	140			0
x	111	3	52.2007	0.0070221	6.1204	1.86859	72.6569	96.5366	167.845	0.482325	0.0020152								67058-111	K17-133.5	37	2019-10-16	21.3	3654105000	Heizler, M	DetritalSanidine	24	Heizler01192		localhost	7.875	Ar41 = A, deleting t<30 @ 10/17/19 8:30 AM; Ar40 = L @ 10/17/19 8:30 AM; Ar39 = L @ 10/17/19 8:30 AM; Ar38 = L @ 10/17/19 8:30 AM; Ar37 = L @ 10/17/19 8:30 AM; Ar36 = L @ 10/17/19 8:30 AM; Ar41 bk val,er = @ 10/17/19 8:35 AM; Average background @ 10/17/19 8:35 AM; Ar40 bk val,er = @ 10/17/19 8:35 AM; Line-segment interpolation @ 10/17/19 8:35 AM; Ar39 bk val,er = @ 10/17/19 8:35 AM; Average backg…	B:24 DS	ALLLLLAAAAAA	1	Pychron Script	1	Fusions CO2	3	0	0	0	0	30	30	203			0
x	15	3	50.6743	0.0171743	0.5213	0.536107	29.7074	99.6988	168.256	0.346209	0.0012293								67058-15	K17-133.5	37	2019-10-08	12.7833	3653384000	Heizler, M	DetritalSanidine	24	Heizler01192		localhost	7.875	Ar41 bk val,er = @ 10/14/19 9:15 AM; Average background @ 10/14/19 9:15 AM; Ar40 bk val,er = @ 10/14/19 9:15 AM; Line-segment interpolation @ 10/14/19 9:15 AM; Ar39 bk val,er = @ 10/14/19 9:15 AM; Average background @ 10/14/19 9:15 AM; Ar38 bk val,er = @ 10/14/19 9:15 AM; Average background @ 10/14/19 9:15 AM; Ar37 bk val,er = @ 10/14/19 9:15 AM; Average background @ 10/14/19 9:15 AM; Ar36 bk val…	B:24 DS	ALLLLLAAAAAA	1	Pychron Script	1	Fusions CO2	3	0	0	0	0	30	30	96			0
x	161	3	51.1353	0.0085146	0.8588	1.51314	59.9211	99.5053	169.402	0.468141	0.0019153								67058-161	K17-133.5	37	2019-10-20	17.3667	3654437000	Heizler, M	DetritalSanidine	24	Heizler01192		localhost	7.875	Ar41 = A, deleting t<30 @ 10/21/19 12:42 PM; Ar40 = L @ 10/21/19 12:42 PM; Ar39 = L @ 10/21/19 12:42 PM; Ar38 = L @ 10/21/19 12:42 PM; Ar37 = L @ 10/21/19 12:42 PM; Ar36 = L @ 10/21/19 12:42 PM; Ar41 bk val,er = @ 10/21/19 12:47 PM; Average background @ 10/21/19 12:47 PM; Ar40 bk val,er = @ 10/21/19 12:47 PM; Line-segment interpolation @ 10/21/19 12:47 PM; Ar39 bk val,er = @ 10/21/19 12:47 PM; Av…	B:24 DS	ALLLLLAAAAAA	1	Pychron Script	1	Fusions CO2	3	0	0	0	0	30	30	167			0
x	153	3	52.8854	0.0139133	1.5806	1.78463	36.6702	99.1192	174.284	0.402988	0.0019153								67058-153	K17-133.5	37	2019-10-20	16.3333	3654433000	Heizler, M	DetritalSanidine	24	Heizler01192		localhost	7.875	Ar41 = A, deleting t<30 @ 10/21/19 12:42 PM; Ar40 = L @ 10/21/19 12:42 PM; Ar39 = L @ 10/21/19 12:42 PM; Ar38 = L @ 10/21/19 12:42 PM; Ar37 = L @ 10/21/19 12:42 PM; Ar36 = L @ 10/21/19 12:42 PM; Ar41 bk val,er = @ 10/21/19 12:47 PM; Average background @ 10/21/19 12:47 PM; Ar40 bk val,er = @ 10/21/19 12:47 PM; Line-segment interpolation @ 10/21/19 12:47 PM; Ar39 bk val,er = @ 10/21/19 12:47 PM; Av…	B:24 DS	ALLLLLAAAAAA	1	Pychron Script	1	Fusions CO2	3	0	0	0	0	30	30	159			0
x	50	3	52.6666	0.0099493	0.7069	0.697802	51.2804	99.605	174.407	0.312298	0.0012293								67058-50	K17-133.5	37	2019-10-08	18.1333	3653403000	Heizler, M	DetritalSanidine	24	Heizler01192		localhost	7.875	Ar41 bk val,er = @ 10/14/19 9:15 AM; Average background @ 10/14/19 9:15 AM; Ar40 bk val,er = @ 10/14/19 9:15 AM; Line-segment interpolation @ 10/14/19 9:15 AM; Ar39 bk val,er = @ 10/14/19 9:15 AM; Average background @ 10/14/19 9:15 AM; Ar38 bk val,er = @ 10/14/19 9:15 AM; Average background @ 10/14/19 9:15 AM; Ar37 bk val,er = @ 10/14/19 9:15 AM; Average background @ 10/14/19 9:15 AM; Ar36 bk val…	B:24 DS	ALLLLLAAAAAA	1	Pychron Script	1	Fusions CO2	3	0	0	0	0	30	30	132			0
x	73	3	53.6476	0.0089018	1.5123	0.959334	57.3147	99.1684	176.762	0.290589	0.0020152								67058-73	K17-133.5	37	2019-10-16	15.5667	3654085000	Heizler, M	DetritalSanidine	24	Heizler01192		localhost	7.875	Ar41 = A, deleting t<30 @ 10/17/19 8:30 AM; Ar40 = L @ 10/17/19 8:30 AM; Ar39 = L @ 10/17/19 8:30 AM; Ar38 = L @ 10/17/19 8:30 AM; Ar37 = L @ 10/17/19 8:30 AM; Ar36 = L @ 10/17/19 8:30 AM; Ar41 bk val,er = @ 10/17/19 8:35 AM; Average background @ 10/17/19 8:35 AM; Ar40 bk val,er = @ 10/17/19 8:35 AM; Line-segment interpolation @ 10/17/19 8:35 AM; Ar39 bk val,er = @ 10/17/19 8:35 AM; Average backg…	B:24 DS	ALLLLLAAAAAA	1	Pychron Script	1	Fusions CO2	3	0	0	0	0	30	30	163			0
x	86	3	53.9903	0.0120409	1.2847	1.58372	42.3726	99.2988	178.061	0.438984	0.0020152								67058-86	K17-133.5	37	2019-10-16	17.2167	3654091000	Heizler, M	DetritalSanidine	24	Heizler01192		localhost	7.875	Ar41 = A, deleting t<30 @ 10/17/19 8:30 AM; Ar40 = L @ 10/17/19 8:30 AM; Ar39 = L @ 10/17/19 8:30 AM; Ar38 = L @ 10/17/19 8:30 AM; Ar37 = L @ 10/17/19 8:30 AM; Ar36 = L @ 10/17/19 8:30 AM; Ar41 bk val,er = @ 10/17/19 8:35 AM; Average background @ 10/17/19 8:35 AM; Ar40 bk val,er = @ 10/17/19 8:35 AM; Line-segment interpolation @ 10/17/19 8:35 AM; Ar39 bk val,er = @ 10/17/19 8:35 AM; Average backg…	B:24 DS	ALLLLLAAAAAA	1	Pychron Script	1	Fusions CO2	3	0	0	0	0	30	30	177			0
x	193	3	55.1433	0.0094894	3.4265	2.43519	53.7657	98.1655	179.706	0.375215	0.0019153								67058-193	K17-133.5	37	2019-10-21	11.5667	3654502000	Heizler, M	DetritalSanidine	24	Heizler01192		localhost	7.875	Ar41 = A, deleting t<30 @ 10/21/19 12:43 PM; Ar40 = L @ 10/21/19 12:43 PM; Ar39 = L @ 10/21/19 12:43 PM; Ar38 = L @ 10/21/19 12:43 PM; Ar37 = L @ 10/21/19 12:43 PM; Ar36 = L @ 10/21/19 12:43 PM; Ar41 bk val,er = @ 10/21/19 12:47 PM; Average background @ 10/21/19 12:47 PM; Ar40 bk val,er = @ 10/21/19 12:47 PM; Line-segment interpolation @ 10/21/19 12:47 PM; Ar39 bk val,er = @ 10/21/19 12:47 PM; Av…	B:24 DS	ALLLLLAAAAAA	1	Pychron Script	1	Fusions CO2	3	0	0	0	0	30	30	201			0
x	16	3	55.501	0.0129751	1.3506	1.65153	39.3218	99.2829	182.775	0.334716	0.0012293								67058-16	K17-133.5	37	2019-10-08	12.8667	3653384000	Heizler, M	DetritalSanidine	24	Heizler01192		localhost	7.875	Ar41 bk val,er = @ 10/14/19 9:15 AM; Average background @ 10/14/19 9:15 AM; Ar40 bk val,er = @ 10/14/19 9:15 AM; Line-segment interpolation @ 10/14/19 9:15 AM; Ar39 bk val,er = @ 10/14/19 9:15 AM; Average background @ 10/14/19 9:15 AM; Ar38 bk val,er = @ 10/14/19 9:15 AM; Average background @ 10/14/19 9:15 AM; Ar37 bk val,er = @ 10/14/19 9:15 AM; Average background @ 10/14/19 9:15 AM; Ar36 bk val…	B:24 DS	ALLLLLAAAAAA	1	Pychron Script	1	Fusions CO2	3	0	0	0	0	30	30	97			0
x	196	3	57.5714	0.0125518	7.5672	1.5855	40.6479	96.1179	183.511	0.686315	0.0019153								67058-196	K17-133.5	37	2019-10-21	11.8667	3654504000	Heizler, M	DetritalSanidine	24	Heizler01192		localhost	7.875	Ar41 = A, deleting t<30 @ 10/21/19 12:43 PM; Ar40 = L @ 10/21/19 12:43 PM; Ar39 = L @ 10/21/19 12:43 PM; Ar38 = L @ 10/21/19 12:43 PM; Ar37 = L @ 10/21/19 12:43 PM; Ar36 = L @ 10/21/19 12:43 PM; Ar41 bk val,er = @ 10/21/19 12:47 PM; Average background @ 10/21/19 12:47 PM; Ar40 bk val,er = @ 10/21/19 12:47 PM; Line-segment interpolation @ 10/21/19 12:47 PM; Ar39 bk val,er = @ 10/21/19 12:47 PM; Av…	B:24 DS	ALLLLLAAAAAA	1	Pychron Script	1	Fusions CO2	3	0	0	0	0	30	30	204			0
x	159	3	55.7812	0.0136806	0.9136	1.93009	37.294	99.5181	184.066	0.341236	0.0019153								67058-159	K17-133.5	37	2019-10-20	17.2	3654436000	Heizler, M	DetritalSanidine	24	Heizler01192		localhost	7.875	Ar41 = A, deleting t<30 @ 10/21/19 12:42 PM; Ar40 = L @ 10/21/19 12:42 PM; Ar39 = L @ 10/21/19 12:42 PM; Ar38 = L @ 10/21/19 12:42 PM; Ar37 = L @ 10/21/19 12:42 PM; Ar36 = L @ 10/21/19 12:42 PM; Ar41 bk val,er = @ 10/21/19 12:47 PM; Average background @ 10/21/19 12:47 PM; Ar40 bk val,er = @ 10/21/19 12:47 PM; Line-segment interpolation @ 10/21/19 12:47 PM; Ar39 bk val,er = @ 10/21/19 12:47 PM; Av…	B:24 DS	ALLLLLAAAAAA	1	Pychron Script	1	Fusions CO2	3	0	0	0	0	30	30	165			0
x	82	3	55.9148	0.0107688	1.0976	1.70321	47.378	99.4217	184.315	0.501621	0.0020152								67058-82	K17-133.5	37	2019-10-16	16.7333	3654089000	Heizler, M	DetritalSanidine	24	Heizler01192		localhost	7.875	Ar41 = A, deleting t<30 @ 10/17/19 8:30 AM; Ar40 = L @ 10/17/19 8:30 AM; Ar39 = L @ 10/17/19 8:30 AM; Ar38 = L @ 10/17/19 8:30 AM; Ar37 = L @ 10/17/19 8:30 AM; Ar36 = L @ 10/17/19 8:30 AM; Ar41 bk val,er = @ 10/17/19 8:35 AM; Average background @ 10/17/19 8:35 AM; Ar40 bk val,er = @ 10/17/19 8:35 AM; Line-segment interpolation @ 10/17/19 8:35 AM; Ar39 bk val,er = @ 10/17/19 8:35 AM; Average backg…	B:24 DS	ALLLLLAAAAAA	1	Pychron Script	1	Fusions CO2	3	0	0	0	0	30	30	172			0
x	121	3	56.46	0.0172788	2.4716	2.52936	29.5277	98.7091	184.757	0.582082	0.0020152								67058-121	K17-133.5	37	2019-10-16	22.35	3654109000	Heizler, M	DetritalSanidine	24	Heizler01192		localhost	7.875	Ar41 = A, deleting t<30 @ 10/17/19 8:30 AM; Ar40 = L @ 10/17/19 8:30 AM; Ar39 = L @ 10/17/19 8:30 AM; Ar38 = L @ 10/17/19 8:30 AM; Ar37 = L @ 10/17/19 8:30 AM; Ar36 = L @ 10/17/19 8:30 AM; Ar41 bk val,er = @ 10/17/19 8:35 AM; Average background @ 10/17/19 8:35 AM; Ar40 bk val,er = @ 10/17/19 8:35 AM; Line-segment interpolation @ 10/17/19 8:35 AM; Ar39 bk val,er = @ 10/17/19 8:35 AM; Average backg…	B:24 DS	ALLLLLAAAAAA	1	Pychron Script	1	Fusions CO2	3	0	0	0	0	30	30	213			0
x	52	3	56.4288	0.0057937	1.6311	2.63871	88.0619	99.1468	185.437	0.575988	0.0012293								67058-52	K17-133.5	37	2019-10-08	18.3	3653404000	Heizler, M	DetritalSanidine	24	Heizler01192		localhost	7.875	Ar41 bk val,er = @ 10/14/19 9:15 AM; Average background @ 10/14/19 9:15 AM; Ar40 bk val,er = @ 10/14/19 9:15 AM; Line-segment interpolation @ 10/14/19 9:15 AM; Ar39 bk val,er = @ 10/14/19 9:15 AM; Average background @ 10/14/19 9:15 AM; Ar38 bk val,er = @ 10/14/19 9:15 AM; Average background @ 10/14/19 9:15 AM; Ar37 bk val,er = @ 10/14/19 9:15 AM; Average background @ 10/14/19 9:15 AM; Ar36 bk val…	B:24 DS	ALLLLLAAAAAA	1	Pychron Script	1	Fusions CO2	3	0	0	0	0	30	30	134			0
x	133	3	57.5842	0.0107722	4.6389	0.615972	47.363	97.6211	186.279	0.397086	0.0019153								67058-133	K17-133.5	37	2019-10-20	13.9	3654424000	Heizler, M	DetritalSanidine	24	Heizler01192		localhost	7.875	Ar41 = A, deleting t<30 @ 10/21/19 12:42 PM; Ar40 = L @ 10/21/19 12:42 PM; Ar39 = L @ 10/21/19 12:42 PM; Ar38 = L @ 10/21/19 12:42 PM; Ar37 = L @ 10/21/19 12:42 PM; Ar36 = L @ 10/21/19 12:42 PM; Ar41 bk val,er = @ 10/21/19 12:46 PM; Average background @ 10/21/19 12:46 PM; Ar40 bk val,er = @ 10/21/19 12:46 PM; Line-segment interpolation @ 10/21/19 12:46 PM; Ar39 bk val,er = @ 10/21/19 12:46 PM; Av…	B:24 DS	ALLLLLAAAAAA	1	Pychron Script	1	Fusions CO2	3	0	0	0	0	30	30	139			0
x	149	3	62.1737	0.0232898	17.6527	0.782038	21.9068	91.6131	188.626	0.364914	0.0019153								67058-149	K17-133.5	37	2019-10-20	15.8	3654431000	Heizler, M	DetritalSanidine	24	Heizler01192		localhost	7.875	Ar41 = A, deleting t<30 @ 10/21/19 12:42 PM; Ar40 = L @ 10/21/19 12:42 PM; Ar39 = L @ 10/21/19 12:42 PM; Ar38 = L @ 10/21/19 12:42 PM; Ar37 = L @ 10/21/19 12:42 PM; Ar36 = L @ 10/21/19 12:42 PM; Ar41 bk val,er = @ 10/21/19 12:46 PM; Average background @ 10/21/19 12:46 PM; Ar40 bk val,er = @ 10/21/19 12:46 PM; Line-segment interpolation @ 10/21/19 12:46 PM; Ar39 bk val,er = @ 10/21/19 12:46 PM; Av…	B:24 DS	ALLLLLAAAAAA	1	Pychron Script	1	Fusions CO2	3	0	0	0	0	30	30	155			0
x	191	3	58.6502	0.0135237	0.6053	2.3755	37.7267	99.6972	193.381	0.721625	0.0019153								67058-191	K17-133.5	37	2019-10-21	11.4	3654502000	Heizler, M	DetritalSanidine	24	Heizler01192		localhost	7.875	Ar41 = A, deleting t<30 @ 10/21/19 12:43 PM; Ar40 = L @ 10/21/19 12:43 PM; Ar39 = L @ 10/21/19 12:43 PM; Ar38 = L @ 10/21/19 12:43 PM; Ar37 = L @ 10/21/19 12:43 PM; Ar36 = L @ 10/21/19 12:43 PM; Ar41 bk val,er = @ 10/21/19 12:47 PM; Average background @ 10/21/19 12:47 PM; Ar40 bk val,er = @ 10/21/19 12:47 PM; Line-segment interpolation @ 10/21/19 12:47 PM; Ar39 bk val,er = @ 10/21/19 12:47 PM; Av…	B:24 DS	ALLLLLAAAAAA	1	Pychron Script	1	Fusions CO2	3	0	0	0	0	30	30	199			0
x	03	3	58.8193	0.0116386	0.7785	1.79116	43.8372	99.6105	193.75	0.57177	0.0012293								67058-03	K17-133.5	37	2019-10-08	8.58333	3653369000	Heizler, M	DetritalSanidine	24	Heizler01192		localhost	7.875	Ar41 bk val,er = @ 10/14/19 9:15 AM; Average background @ 10/14/19 9:15 AM; Ar40 bk val,er = @ 10/14/19 9:15 AM; Line-segment interpolation @ 10/14/19 9:15 AM; Ar39 bk val,er = @ 10/14/19 9:15 AM; Average background @ 10/14/19 9:15 AM; Ar38 bk val,er = @ 10/14/19 9:15 AM; Average background @ 10/14/19 9:15 AM; Ar37 bk val,er = @ 10/14/19 9:15 AM; Average background @ 10/14/19 9:15 AM; Ar36 bk val…	B:24 DS	ALLLLLAAAAAA	1	Pychron Script	1	Fusions CO2	3	0	0	0	0	30	30	84			0
x	141	3	63.9831	0.0111653	1.3463	1.24122	45.6955	99.3798	209.36	0.669092	0.0019153								67058-141	K17-133.5	37	2019-10-20	14.7	3654427000	Heizler, M	DetritalSanidine	24	Heizler01192		localhost	7.875	Ar41 = A, deleting t<30 @ 10/21/19 12:42 PM; Ar40 = L @ 10/21/19 12:42 PM; Ar39 = L @ 10/21/19 12:42 PM; Ar38 = L @ 10/21/19 12:42 PM; Ar37 = L @ 10/21/19 12:42 PM; Ar36 = L @ 10/21/19 12:42 PM; Ar41 bk val,er = @ 10/21/19 12:46 PM; Average background @ 10/21/19 12:46 PM; Ar40 bk val,er = @ 10/21/19 12:46 PM; Line-segment interpolation @ 10/21/19 12:46 PM; Ar39 bk val,er = @ 10/21/19 12:46 PM; Av…	B:24 DS	ALLLLLAAAAAA	1	Pychron Script	1	Fusions CO2	3	0	0	0	0	30	30	147			0
x	41	3	64.7756	0.0160751	2.4114	0.785596	31.7388	98.902	210.847	0.409202	0.0012293								67058-41	K17-133.5	37	2019-10-08	16.5167	3653397000	Heizler, M	DetritalSanidine	24	Heizler01192		localhost	7.875	Ar41 bk val,er = @ 10/14/19 9:15 AM; Average background @ 10/14/19 9:15 AM; Ar40 bk val,er = @ 10/14/19 9:15 AM; Line-segment interpolation @ 10/14/19 9:15 AM; Ar39 bk val,er = @ 10/14/19 9:15 AM; Average background @ 10/14/19 9:15 AM; Ar38 bk val,er = @ 10/14/19 9:15 AM; Average background @ 10/14/19 9:15 AM; Ar37 bk val,er = @ 10/14/19 9:15 AM; Average background @ 10/14/19 9:15 AM; Ar36 bk val…	B:24 DS	ALLLLLAAAAAA	1	Pychron Script	1	Fusions CO2	3	0	0	0	0	30	30	123			0
x	147	3	65.0815	0.0080461	0.9281	0.83103	63.4101	99.5797	213.156	0.345602	0.0019153								67058-147	K17-133.5	37	2019-10-20	15.5833	3654431000	Heizler, M	DetritalSanidine	24	Heizler01192		localhost	7.875	Ar41 = A, deleting t<30 @ 10/21/19 12:42 PM; Ar40 = L @ 10/21/19 12:42 PM; Ar39 = L @ 10/21/19 12:42 PM; Ar38 = L @ 10/21/19 12:42 PM; Ar37 = L @ 10/21/19 12:42 PM; Ar36 = L @ 10/21/19 12:42 PM; Ar41 bk val,er = @ 10/21/19 12:46 PM; Average background @ 10/21/19 12:46 PM; Ar40 bk val,er = @ 10/21/19 12:46 PM; Line-segment interpolation @ 10/21/19 12:46 PM; Ar39 bk val,er = @ 10/21/19 12:46 PM; Av…	B:24 DS	ALLLLLAAAAAA	1	Pychron Script	1	Fusions CO2	3	0	0	0	0	30	30	153			0
x	194	3	65.3304	0.0148993	0.5218	0.881136	34.2435	99.7659	214.304	0.29051	0.0019153								67058-194	K17-133.5	37	2019-10-21	11.6667	3654503000	Heizler, M	DetritalSanidine	24	Heizler01192		localhost	7.875	Ar41 = A, deleting t<30 @ 10/21/19 12:43 PM; Ar40 = L @ 10/21/19 12:43 PM; Ar39 = L @ 10/21/19 12:43 PM; Ar38 = L @ 10/21/19 12:43 PM; Ar37 = L @ 10/21/19 12:43 PM; Ar36 = L @ 10/21/19 12:43 PM; Ar41 bk val,er = @ 10/21/19 12:47 PM; Average background @ 10/21/19 12:47 PM; Ar40 bk val,er = @ 10/21/19 12:47 PM; Line-segment interpolation @ 10/21/19 12:47 PM; Ar39 bk val,er = @ 10/21/19 12:47 PM; Av…	B:24 DS	ALLLLLAAAAAA	1	Pychron Script	1	Fusions CO2	3	0	0	0	0	30	30	202			0
x	59	3	65.8619	0.0049173	1.0262	0.709553	103.757	99.5402	215.487	0.437538	0.0012293								67058-59	K17-133.5	37	2019-10-08	19.15	3653407000	Heizler, M	DetritalSanidine	24	Heizler01192		localhost	7.875	Ar41 bk val,er = @ 10/14/19 9:15 AM; Average background @ 10/14/19 9:15 AM; Ar40 bk val,er = @ 10/14/19 9:15 AM; Line-segment interpolation @ 10/14/19 9:15 AM; Ar39 bk val,er = @ 10/14/19 9:15 AM; Average background @ 10/14/19 9:15 AM; Ar38 bk val,er = @ 10/14/19 9:15 AM; Average background @ 10/14/19 9:15 AM; Ar37 bk val,er = @ 10/14/19 9:15 AM; Average background @ 10/14/19 9:15 AM; Ar36 bk val…	B:24 DS	ALLLLLAAAAAA	1	Pychron Script	1	Fusions CO2	3	0	0	0	0	30	30	141			0
x	66	3	66.1064	0.0065096	0.6631	1.43718	78.3772	99.7044	216.578	0.616306	0.0020152								67058-66	K17-133.5	37	2019-10-16	14.65	3654082000	Heizler, M	DetritalSanidine	24	Heizler01192		localhost	7.875	Ar41 = A, deleting t<30 @ 10/17/19 8:30 AM; Ar40 = L @ 10/17/19 8:30 AM; Ar39 = L @ 10/17/19 8:30 AM; Ar38 = L @ 10/17/19 8:30 AM; Ar37 = L @ 10/17/19 8:30 AM; Ar36 = L @ 10/17/19 8:30 AM; Ar41 bk val,er = @ 10/17/19 8:35 AM; Average background @ 10/17/19 8:35 AM; Ar40 bk val,er = @ 10/17/19 8:35 AM; Line-segment interpolation @ 10/17/19 8:35 AM; Ar39 bk val,er = @ 10/17/19 8:35 AM; Average backg…	B:24 DS	ALLLLLAAAAAA	1	Pychron Script	1	Fusions CO2	3	0	0	0	0	30	30	156			0
x	45	3	66.6668	0.0102008	1.4663	1.61522	50.0161	99.3513	217.58	0.489151	0.0012293								67058-45	K17-133.5	37	2019-10-08	17.1167	3653399000	Heizler, M	DetritalSanidine	24	Heizler01192		localhost	7.875	Ar41 bk val,er = @ 10/14/19 9:15 AM; Average background @ 10/14/19 9:15 AM; Ar40 bk val,er = @ 10/14/19 9:15 AM; Line-segment interpolation @ 10/14/19 9:15 AM; Ar39 bk val,er = @ 10/14/19 9:15 AM; Average background @ 10/14/19 9:15 AM; Ar38 bk val,er = @ 10/14/19 9:15 AM; Average background @ 10/14/19 9:15 AM; Ar37 bk val,er = @ 10/14/19 9:15 AM; Average background @ 10/14/19 9:15 AM; Ar36 bk val…	B:24 DS	ALLLLLAAAAAA	1	Pychron Script	1	Fusions CO2	3	0	0	0	0	30	30	127			0
x	169	3	67.4553	0.021263	3.032	1.90592	23.9949	98.6746	218.594	0.996931	0.0019153								67058-169	K17-133.5	37	2019-10-21	8.1	3654490000	Heizler, M	DetritalSanidine	24	Heizler01192		localhost	7.875	Ar41 = A, deleting t<30 @ 10/21/19 12:43 PM; Ar40 = L @ 10/21/19 12:43 PM; Ar39 = L @ 10/21/19 12:43 PM; Ar38 = L @ 10/21/19 12:43 PM; Ar37 = L @ 10/21/19 12:43 PM; Ar36 = L @ 10/21/19 12:43 PM; Ar41 bk val,er = @ 10/21/19 12:47 PM; Average background @ 10/21/19 12:47 PM; Ar40 bk val,er = @ 10/21/19 12:47 PM; Line-segment interpolation @ 10/21/19 12:47 PM; Ar39 bk val,er = @ 10/21/19 12:47 PM; Av…	B:24 DS	ALLLLLAAAAAA	1	Pychron Script	1	Fusions CO2	3	0	0	0	0	30	30	177			0
x	40	3	67.0477	0.0101506	0.92	1.19321	50.2634	99.5958	219.259	0.732863	0.0012293								67058-40	K17-133.5	37	2019-10-08	16.4167	3653397000	Heizler, M	DetritalSanidine	24	Heizler01192		localhost	7.875	Ar41 bk val,er = @ 10/14/19 9:15 AM; Average background @ 10/14/19 9:15 AM; Ar40 bk val,er = @ 10/14/19 9:15 AM; Line-segment interpolation @ 10/14/19 9:15 AM; Ar39 bk val,er = @ 10/14/19 9:15 AM; Average background @ 10/14/19 9:15 AM; Ar38 bk val,er = @ 10/14/19 9:15 AM; Average background @ 10/14/19 9:15 AM; Ar37 bk val,er = @ 10/14/19 9:15 AM; Average background @ 10/14/19 9:15 AM; Ar36 bk val…	B:24 DS	ALLLLLAAAAAA	1	Pychron Script	1	Fusions CO2	3	0	0	0	0	30	30	122			0
x	126	3	66.9541	0.0145741	0.5811	2.97506	35.0076	99.7455	219.281	0.986594	0.0020152								67058-126	K17-133.5	37	2019-10-16	23.4167	3654113000	Heizler, M	DetritalSanidine	24	Heizler01192		localhost	7.875	Ar41 = A, deleting t<30 @ 10/17/19 8:30 AM; Ar40 = L @ 10/17/19 8:30 AM; Ar39 = L @ 10/17/19 8:30 AM; Ar38 = L @ 10/17/19 8:30 AM; Ar37 = L @ 10/17/19 8:30 AM; Ar36 = L @ 10/17/19 8:30 AM; Ar41 bk val,er = @ 10/17/19 8:35 AM; Average background @ 10/17/19 8:35 AM; Ar40 bk val,er = @ 10/17/19 8:35 AM; Line-segment interpolation @ 10/17/19 2:35 PM; Ar39 bk val,er = @ 10/17/19 8:35 AM; Average backg…	B:24 DS	ALLLLLAAAAAA	1	Pychron Script	1	Fusions CO2	3	0	0	0	0	30	30	219			0
x	83	3	67.2326	0.0118207	0.881	0.773042	43.1619	99.6142	219.867	0.413316	0.0020152								67058-83	K17-133.5	37	2019-10-16	16.8333	3654089000	Heizler, M	DetritalSanidine	24	Heizler01192		localhost	7.875	Ar41 = A, deleting t<30 @ 10/17/19 8:30 AM; Ar40 = L @ 10/17/19 8:30 AM; Ar39 = L @ 10/17/19 8:30 AM; Ar38 = L @ 10/17/19 8:30 AM; Ar37 = L @ 10/17/19 8:30 AM; Ar36 = L @ 10/17/19 8:30 AM; Ar41 bk val,er = @ 10/17/19 8:35 AM; Average background @ 10/17/19 8:35 AM; Ar40 bk val,er = @ 10/17/19 8:35 AM; Line-segment interpolation @ 10/17/19 8:35 AM; Ar39 bk val,er = @ 10/17/19 8:35 AM; Average backg…	B:24 DS	ALLLLLAAAAAA	1	Pychron Script	1	Fusions CO2	3	0	0	0	0	30	30	173			0
x	72	3	69.017	0.0071057	1.7019	1.81934	71.8021	99.2723	224.629	0.815804	0.0020152								67058-72	K17-133.5	37	2019-10-16	15.4833	3654085000	Heizler, M	DetritalSanidine	24	Heizler01192		localhost	7.875	Ar41 = A, deleting t<30 @ 10/17/19 8:30 AM; Ar40 = L @ 10/17/19 8:30 AM; Ar39 = L @ 10/17/19 8:30 AM; Ar38 = L @ 10/17/19 8:30 AM; Ar37 = L @ 10/17/19 8:30 AM; Ar36 = L @ 10/17/19 8:30 AM; Ar41 bk val,er = @ 10/17/19 8:35 AM; Average background @ 10/17/19 8:35 AM; Ar40 bk val,er = @ 10/17/19 8:35 AM; Line-segment interpolation @ 10/17/19 8:35 AM; Ar39 bk val,er = @ 10/17/19 8:35 AM; Average backg…	B:24 DS	ALLLLLAAAAAA	1	Pychron Script	1	Fusions CO2	3	0	0	0	0	30	30	162			0
x	116	3	79.8095	0.0148688	10.2676	0.349332	34.3137	96.2002	249.946	0.884865	0.0020152								67058-116	K17-133.5	37	2019-10-16	21.9	3654108000	Heizler, M	DetritalSanidine	24	Heizler01192		localhost	7.875	Ar41 = A, deleting t<30 @ 10/17/19 8:30 AM; Ar40 = L @ 10/17/19 8:30 AM; Ar39 = L @ 10/17/19 8:30 AM; Ar38 = L @ 10/17/19 8:30 AM; Ar37 = L @ 10/17/19 8:30 AM; Ar36 = L @ 10/17/19 8:30 AM; Ar41 bk val,er = @ 10/17/19 8:35 AM; Average background @ 10/17/19 8:35 AM; Ar40 bk val,er = @ 10/17/19 8:35 AM; Line-segment interpolation @ 10/17/19 8:35 AM; Ar39 bk val,er = @ 10/17/19 8:35 AM; Average backg…	B:24 DS	ALLLLLAAAAAA	1	Pychron Script	1	Fusions CO2	3	0	0	0	0	30	30	208			0
x	13	3	92.2608	0.012564	10.7256	0.482755	40.6084	96.5659	287.044	0.845305	0.0012293								67058-13	K17-133.5	37	2019-10-08	9.68333	3653372000	Heizler, M	DetritalSanidine	24	Heizler01192		localhost	7.875	Ar41 bk val,er = @ 10/14/19 9:15 AM; Average background @ 10/14/19 9:15 AM; Ar40 bk val,er = @ 10/14/19 9:15 AM; Line-segment interpolation @ 10/14/19 9:15 AM; Ar39 bk val,er = @ 10/14/19 9:15 AM; Average background @ 10/14/19 9:15 AM; Ar38 bk val,er = @ 10/14/19 9:15 AM; Average background @ 10/14/19 9:15 AM; Ar37 bk val,er = @ 10/14/19 9:15 AM; Average background @ 10/14/19 9:15 AM; Ar36 bk val…	B:24 DS	ALLLLLAAAAAA	1	Pychron Script	1	Fusions CO2	3	0	0	0	0	30	30	94			0
x	14	3	91.0556	0.0027758	3.9082	0.561324	183.804	98.7319	289.452	0.59098	0.0012293								67058-14	K17-133.5	37	2019-10-08	12.6833	3653383000	Heizler, M	DetritalSanidine	24	Heizler01192		localhost	7.875	Ar41 bk val,er = @ 10/14/19 9:15 AM; Average background @ 10/14/19 9:15 AM; Ar40 bk val,er = @ 10/14/19 9:15 AM; Line-segment interpolation @ 10/14/19 9:15 AM; Ar39 bk val,er = @ 10/14/19 9:15 AM; Average background @ 10/14/19 9:15 AM; Ar38 bk val,er = @ 10/14/19 9:15 AM; Average background @ 10/14/19 9:15 AM; Ar37 bk val,er = @ 10/14/19 9:15 AM; Average background @ 10/14/19 9:15 AM; Ar36 bk val…	B:24 DS	ALLLLLAAAAAA	1	Pychron Script	1	Fusions CO2	3	0	0	0	0	30	30	95			0
x	135	3	92.7907	0.0076582	6.9824	2.18755	66.6219	97.7771	291.914	1.16913	0.0019153								67058-135	K17-133.5	37	2019-10-20	14.0833	3654425000	Heizler, M	DetritalSanidine	24	Heizler01192		localhost	7.875	Ar41 = A, deleting t<30 @ 10/21/19 12:42 PM; Ar40 = L @ 10/21/19 12:42 PM; Ar39 = L @ 10/21/19 12:42 PM; Ar38 = L @ 10/21/19 12:42 PM; Ar37 = L @ 10/21/19 12:42 PM; Ar36 = L @ 10/21/19 12:42 PM; Ar41 bk val,er = @ 10/21/19 12:46 PM; Average background @ 10/21/19 12:46 PM; Ar40 bk val,er = @ 10/21/19 12:46 PM; Line-segment interpolation @ 10/21/19 12:46 PM; Ar39 bk val,er = @ 10/21/19 12:46 PM; Av…	B:24 DS	ALLLLLAAAAAA	1	Pychron Script	1	Fusions CO2	3	0	0	0	0	30	30	141			0
x	90	3	97.421	0.0145843	10.6306	0.597636	34.9831	96.7768	302.451	0.663433	0.0020152								67058-90	K17-133.5	37	2019-10-16	17.5833	3654092000	Heizler, M	DetritalSanidine	24	Heizler01192		localhost	7.875	Ar41 = A, deleting t<30 @ 10/17/19 8:30 AM; Ar40 = L @ 10/17/19 8:30 AM; Ar39 = L @ 10/17/19 8:30 AM; Ar38 = L @ 10/17/19 8:30 AM; Ar37 = L @ 10/17/19 8:30 AM; Ar36 = L @ 10/17/19 8:30 AM; Ar41 bk val,er = @ 10/17/19 8:35 AM; Average background @ 10/17/19 8:35 AM; Ar40 bk val,er = @ 10/17/19 8:35 AM; Line-segment interpolation @ 10/17/19 8:35 AM; Ar39 bk val,er = @ 10/17/19 8:35 AM; Average backg…	B:24 DS	ALLLLLAAAAAA	1	Pychron Script	1	Fusions CO2	3	0	0	0	0	30	30	181			0
x	137	3	97.6103	0.0175755	5.5603	0.543914	29.0293	98.3182	307.436	0.742705	0.0019153								67058-137	K17-133.5	37	2019-10-20	14.3	3654426000	Heizler, M	DetritalSanidine	24	Heizler01192		localhost	7.875	Ar41 = A, deleting t<30 @ 10/21/19 12:42 PM; Ar40 = L @ 10/21/19 12:42 PM; Ar39 = L @ 10/21/19 12:42 PM; Ar38 = L @ 10/21/19 12:42 PM; Ar37 = L @ 10/21/19 12:42 PM; Ar36 = L @ 10/21/19 12:42 PM; Ar41 bk val,er = @ 10/21/19 12:46 PM; Average background @ 10/21/19 12:46 PM; Ar40 bk val,er = @ 10/21/19 12:46 PM; Line-segment interpolation @ 10/21/19 12:46 PM; Ar39 bk val,er = @ 10/21/19 12:46 PM; Av…	B:24 DS	ALLLLLAAAAAA	1	Pychron Script	1	Fusions CO2	3	0	0	0	0	30	30	143			0
x	12	3	112.616	-0.0001051	9.2381	1.08889	-	97.576	348.02	1.13393	0.0012293								67058-12	K17-133.5	37	2019-10-08	9.58333	3653372000	Heizler, M	DetritalSanidine	24	Heizler01192		localhost	7.875	Ar41 bk val,er = @ 10/14/19 9:15 AM; Average background @ 10/14/19 9:15 AM; Ar40 bk val,er = @ 10/14/19 9:15 AM; Line-segment interpolation @ 10/14/19 9:15 AM; Ar39 bk val,er = @ 10/14/19 9:15 AM; Average background @ 10/14/19 9:15 AM; Ar38 bk val,er = @ 10/14/19 9:15 AM; Average background @ 10/14/19 9:15 AM; Ar37 bk val,er = @ 10/14/19 9:15 AM; Average background @ 10/14/19 9:15 AM; Ar36 bk val…	B:24 DS	ALLLLLAAAAAA	1	Pychron Script	1	Fusions CO2	3	0	0	0	0	30	30	93			0
x	164	3	134.871	0.0116758	15.6466	1.54023	43.6976	96.5727	405.83	1.6635	0.0019153								67058-164	K17-133.5	37	2019-10-20	17.8167	3654439000	Heizler, M	DetritalSanidine	24	Heizler01192		localhost	7.875	Ar41 = A, deleting t<30 @ 10/21/19 12:43 PM; Ar40 = L @ 10/21/19 12:43 PM; Ar39 = L @ 10/21/19 12:43 PM; Ar38 = L @ 10/21/19 12:43 PM; Ar37 = L @ 10/21/19 12:43 PM; Ar36 = L @ 10/21/19 12:43 PM; Ar41 bk val,er = @ 10/21/19 12:47 PM; Average background @ 10/21/19 12:47 PM; Ar40 bk val,er = @ 10/21/19 12:47 PM; Line-segment interpolation @ 10/21/19 12:47 PM; Ar39 bk val,er = @ 10/21/19 12:47 PM; Av…	B:24 DS	ALLLLLAAAAAA	1	Pychron Script	1	Fusions CO2	3	0	0	0	0	30	30	170			0
x	04	3	147.97	0.0034472	6.7151	1.41385	148.005	98.6593	449.288	2.79074	0.0012293								67058-04	K17-133.5	37	2019-10-08	8.65	3653369000	Heizler, M	DetritalSanidine	24	Heizler01192		localhost	7.875	Ar41 bk val,er = @ 10/14/19 9:15 AM; Average background @ 10/14/19 9:15 AM; Ar40 bk val,er = @ 10/14/19 9:15 AM; Line-segment interpolation @ 10/14/19 9:15 AM; Ar39 bk val,er = @ 10/14/19 9:15 AM; Average background @ 10/14/19 9:15 AM; Ar38 bk val,er = @ 10/14/19 9:15 AM; Average background @ 10/14/19 9:15 AM; Ar37 bk val,er = @ 10/14/19 9:15 AM; Average background @ 10/14/19 9:15 AM; Ar36 bk val…	B:24 DS	ALLLLLAAAAAA	1	Pychron Script	1	Fusions CO2	3	0	0	0	0	30	30	85			0
x	57	3	241.494	0.0223625	2.0705	0.386326	22.8152	99.7475	691.516	3.16309	0.0012293								67058-57	K17-133.5	37	2019-10-08	18.8167	3653405000	Heizler, M	DetritalSanidine	24	Heizler01192		localhost	7.875	Ar41 bk val,er = @ 10/14/19 9:15 AM; Average background @ 10/14/19 9:15 AM; Ar40 bk val,er = @ 10/14/19 9:15 AM; Line-segment interpolation @ 10/14/19 9:15 AM; Ar39 bk val,er = @ 10/14/19 9:15 AM; Average background @ 10/14/19 9:15 AM; Ar38 bk val,er = @ 10/14/19 9:15 AM; Average background @ 10/14/19 9:15 AM; Ar37 bk val,er = @ 10/14/19 9:15 AM; Average background @ 10/14/19 9:15 AM; Ar36 bk val…	B:24 DS	ALLLLLAAAAAA	1	Pychron Script	1	Fusions CO2	3	0	0	0	0	30	30	139			0
x	47	3	272.109	-0.0292261	4.4848	0.0819919	-	99.5123	761.614	6.79385	0.0012293								67058-47	K17-133.5	37	2019-10-08	17.4667	3653400000	Heizler, M	DetritalSanidine	24	Heizler01192		localhost	7.875	Ar41 bk val,er = @ 10/14/19 9:15 AM; Average background @ 10/14/19 9:15 AM; Ar40 bk val,er = @ 10/14/19 9:15 AM; Line-segment interpolation @ 10/14/19 9:15 AM; Ar39 bk val,er = @ 10/14/19 9:15 AM; Average background @ 10/14/19 9:15 AM; Ar38 bk val,er = @ 10/14/19 9:15 AM; Average background @ 10/14/19 9:15 AM; Ar37 bk val,er = @ 10/14/19 9:15 AM; Average background @ 10/14/19 9:15 AM; Ar36 bk val…	B:24 DS	ALLLLLAAAAAA	1	Pychron Script	1	Fusions CO2	3	0	0	0	0	30	30	129			0
x	118	3	278.809	0.0630967	0.5463	0.0695674	8.08606	99.9443	779.677	8.78513	0.0020152								67058-118	K17-133.5	37	2019-10-16	22.1	3654108000	Heizler, M	DetritalSanidine	24	Heizler01192		localhost	7.875	Ar41 = A, deleting t<30 @ 10/17/19 8:30 AM; Ar40 = L @ 10/17/19 8:30 AM; Ar39 = L @ 10/17/19 8:30 AM; Ar38 = L @ 10/17/19 8:30 AM; Ar37 = L @ 10/17/19 8:30 AM; Ar36 = L @ 10/17/19 8:30 AM; Ar41 bk val,er = @ 10/17/19 8:35 AM; Average background @ 10/17/19 8:35 AM; Ar40 bk val,er = @ 10/17/19 8:35 AM; Line-segment interpolation @ 10/17/19 8:35 AM; Ar39 bk val,er = @ 10/17/19 8:35 AM; Average backg…	B:24 DS	ALLLLLAAAAAA	1	Pychron Script	1	Fusions CO2	3	0	0	0	0	30	30	210			0
x	130	3	306.225	0.0357474	-0.259	0.0952681	14.2725	100.026	841.605	7.54883	0.0019153								67058-130	K17-133.5	37	2019-10-20	10.5333	3654412000	Heizler, M	DetritalSanidine	24	Heizler01192		localhost	7.875	Ar41 = A, deleting t<30 @ 10/21/19 12:42 PM; Ar40 = L @ 10/21/19 12:42 PM; Ar39 = L @ 10/21/19 12:42 PM; Ar38 = L @ 10/21/19 12:42 PM; Ar37 = L @ 10/21/19 12:42 PM; Ar36 = L @ 10/21/19 12:42 PM; Ar41 bk val,er = @ 10/21/19 12:46 PM; Average background @ 10/21/19 12:46 PM; Ar40 bk val,er = @ 10/21/19 12:46 PM; Line-segment interpolation @ 10/21/19 12:46 PM; Ar39 bk val,er = @ 10/21/19 12:46 PM; Av…	B:24 DS	ALLLLLAAAAAA	1	Pychron Script	1	Fusions CO2	3	0	0	0	0	30	30	135			0
x	84	3	316.071	0.101242	2.2379	0.0490076	5.03944	99.7937	861.601	14.8544	0.0020152								67058-84	K17-133.5	37	2019-10-16	17.0333	3654090000	Heizler, M	DetritalSanidine	24	Heizler01192		localhost	7.875	Ar41 = A, deleting t<30 @ 10/17/19 8:30 AM; Ar40 = L @ 10/17/19 8:30 AM; Ar39 = L @ 10/17/19 8:30 AM; Ar38 = L @ 10/17/19 8:30 AM; Ar37 = L @ 10/17/19 8:30 AM; Ar36 = L @ 10/17/19 8:30 AM; Ar41 bk val,er = @ 10/17/19 8:35 AM; Average background @ 10/17/19 8:35 AM; Ar40 bk val,er = @ 10/17/19 8:35 AM; Line-segment interpolation @ 10/17/19 8:35 AM; Ar39 bk val,er = @ 10/17/19 8:35 AM; Average backg…	B:24 DS	ALLLLLAAAAAA	1	Pychron Script	1	Fusions CO2	3	0	0	0	0	30	30	174			0
x	51	3	315.729	0.0342537	-1.957	0.0574208	14.8949	100.184	863.511	10.9872	0.0012293								67058-51	K17-133.5	37	2019-10-08	18.2333	3653403000	Heizler, M	DetritalSanidine	24	Heizler01192		localhost	7.875	Ar41 bk val,er = @ 10/14/19 9:15 AM; Average background @ 10/14/19 9:15 AM; Ar40 bk val,er = @ 10/14/19 9:15 AM; Line-segment interpolation @ 10/14/19 9:15 AM; Ar39 bk val,er = @ 10/14/19 9:15 AM; Average background @ 10/14/19 9:15 AM; Ar38 bk val,er = @ 10/14/19 9:15 AM; Average background @ 10/14/19 9:15 AM; Ar37 bk val,er = @ 10/14/19 9:15 AM; Average background @ 10/14/19 9:15 AM; Ar36 bk val…	B:24 DS	ALLLLLAAAAAA	1	Pychron Script	1	Fusions CO2	3	0	0	0	0	30	30	133			0
x	87	3	319.19	0.0210706	2.893	0.560499	24.214	99.7328	867.912	7.12175	0.0020152								67058-87	K17-133.5	37	2019-10-16	17.2833	3654091000	Heizler, M	DetritalSanidine	24	Heizler01192		localhost	7.875	Ar41 = A, deleting t<30 @ 10/17/19 8:30 AM; Ar40 = L @ 10/17/19 8:30 AM; Ar39 = L @ 10/17/19 8:30 AM; Ar38 = L @ 10/17/19 8:30 AM; Ar37 = L @ 10/17/19 8:30 AM; Ar36 = L @ 10/17/19 8:30 AM; Ar41 bk val,er = @ 10/17/19 8:35 AM; Average background @ 10/17/19 8:35 AM; Ar40 bk val,er = @ 10/17/19 8:35 AM; Line-segment interpolation @ 10/17/19 8:35 AM; Ar39 bk val,er = @ 10/17/19 8:35 AM; Average backg…	B:24 DS	ALLLLLAAAAAA	1	Pychron Script	1	Fusions CO2	3	0	0	0	0	30	30	178			0
x	36	3	410.757	0.031525	0.0482	0.0936062	16.1841	99.9972	1058.3	7.36996	0.0012293								67058-36	K17-133.5	37	2019-10-08	16.05	3653395000	Heizler, M	DetritalSanidine	24	Heizler01192		localhost	7.875	Ar41 bk val,er = @ 10/14/19 9:15 AM; Average background @ 10/14/19 9:15 AM; Ar40 bk val,er = @ 10/14/19 9:15 AM; Line-segment interpolation @ 10/14/19 9:15 AM; Ar39 bk val,er = @ 10/14/19 9:15 AM; Average background @ 10/14/19 9:15 AM; Ar38 bk val,er = @ 10/14/19 9:15 AM; Average background @ 10/14/19 9:15 AM; Ar37 bk val,er = @ 10/14/19 9:15 AM; Average background @ 10/14/19 9:15 AM; Ar36 bk val…	B:24 DS	ALLLLLAAAAAA	1	Pychron Script	1	Fusions CO2	3	0	0	0	0	30	30	118			0
x	77	3	418.221	0.079357	-0.0794	0.0361829	6.42922	100.007	1072.95	23.3286	0.0020152								67058-77	K17-133.5	37	2019-10-16	15.9167	3654086000	Heizler, M	DetritalSanidine	24	Heizler01192		localhost	7.875	Ar41 = A, deleting t<30 @ 10/17/19 8:30 AM; Ar40 = L @ 10/17/19 8:30 AM; Ar39 = L @ 10/17/19 8:30 AM; Ar38 = L @ 10/17/19 8:30 AM; Ar37 = L @ 10/17/19 8:30 AM; Ar36 = L @ 10/17/19 8:30 AM; Ar41 bk val,er = @ 10/17/19 8:35 AM; Average background @ 10/17/19 8:35 AM; Ar40 bk val,er = @ 10/17/19 8:35 AM; Line-segment interpolation @ 10/17/19 8:35 AM; Ar39 bk val,er = @ 10/17/19 8:35 AM; Average backg…	B:24 DS	ALLLLLAAAAAA	1	Pychron Script	1	Fusions CO2	3	0	0	0	0	30	30	167			0
x	02	3	425.197	0.0030813	-0.0414	0.0495244	165.581	100.003	1086.37	16.6366	0.0012293								67058-02	K17-133.5	37	2019-10-08	8.51667	3653368000	Heizler, M	DetritalSanidine	24	Heizler01192		localhost	7.875	Ar41 bk val,er = @ 10/14/19 9:15 AM; Average background @ 10/14/19 9:15 AM; Ar40 bk val,er = @ 10/14/19 9:15 AM; Line-segment interpolation @ 10/14/19 9:15 AM; Ar39 bk val,er = @ 10/14/19 9:15 AM; Average background @ 10/14/19 9:15 AM; Ar38 bk val,er = @ 10/14/19 9:15 AM; Average background @ 10/14/19 9:15 AM; Ar37 bk val,er = @ 10/14/19 9:15 AM; Average background @ 10/14/19 9:15 AM; Ar36 bk val…	B:24 DS	ALLLLLAAAAAA	1	Pychron Script	1	Fusions CO2	3	0	0	0	0	30	30	83			0
x	173	3	426.574	0.079778	0.8224	0.0606989	6.3953	99.9447	1088.58	13.6013	0.0019153								67058-173	K17-133.5	37	2019-10-21	8.66667	3654492000	Heizler, M	DetritalSanidine	24	Heizler01192		localhost	7.875	Ar41 = A, deleting t<30 @ 10/21/19 12:43 PM; Ar40 = L @ 10/21/19 12:43 PM; Ar39 = L @ 10/21/19 12:43 PM; Ar38 = L @ 10/21/19 12:43 PM; Ar37 = L @ 10/21/19 12:43 PM; Ar36 = L @ 10/21/19 12:43 PM; Ar41 bk val,er = @ 10/21/19 12:47 PM; Average background @ 10/21/19 12:47 PM; Ar40 bk val,er = @ 10/21/19 12:47 PM; Line-segment interpolation @ 10/21/19 12:47 PM; Ar39 bk val,er = @ 10/21/19 12:47 PM; Av…	B:24 DS	ALLLLLAAAAAA	1	Pychron Script	1	Fusions CO2	3	0	0	0	0	30	30	181			0
x	93	3	426.55	0.0644225	-0.3505	0.0736509	7.91966	100.026	1089.19	11.8484	0.0020152								67058-93	K17-133.5	37	2019-10-16	18.9333	3654097000	Heizler, M	DetritalSanidine	24	Heizler01192		localhost	7.875	Ar41 = A, deleting t<30 @ 10/17/19 8:30 AM; Ar40 = L @ 10/17/19 8:30 AM; Ar39 = L @ 10/17/19 8:30 AM; Ar38 = L @ 10/17/19 8:30 AM; Ar37 = L @ 10/17/19 8:30 AM; Ar36 = L @ 10/17/19 8:30 AM; Ar41 bk val,er = @ 10/17/19 8:35 AM; Average background @ 10/17/19 8:35 AM; Ar40 bk val,er = @ 10/17/19 8:35 AM; Line-segment interpolation @ 10/17/19 8:35 AM; Ar39 bk val,er = @ 10/17/19 8:35 AM; Average backg…	B:24 DS	ALLLLLAAAAAA	1	Pychron Script	1	Fusions CO2	3	0	0	0	0	30	30	184			0
x	24	3	449.616	0.137982	4.1317	0.0337313	3.69761	99.731	1130.6	23.2313	0.0012293								67058-24	K17-133.5	37	2019-10-08	14.45	3653390000	Heizler, M	DetritalSanidine	24	Heizler01192		localhost	7.875	Ar41 bk val,er = @ 10/14/19 9:15 AM; Average background @ 10/14/19 9:15 AM; Ar40 bk val,er = @ 10/14/19 9:15 AM; Line-segment interpolation @ 10/14/19 9:15 AM; Ar39 bk val,er = @ 10/14/19 9:15 AM; Average background @ 10/14/19 9:15 AM; Ar38 bk val,er = @ 10/14/19 9:15 AM; Average background @ 10/14/19 9:15 AM; Ar37 bk val,er = @ 10/14/19 9:15 AM; Average background @ 10/14/19 9:15 AM; Ar36 bk val…	B:24 DS	ALLLLLAAAAAA	1	Pychron Script	1	Fusions CO2	3	0	0	0	0	30	30	106			0
x	65	3	449.547	0.0140571	-1.3692	0.0412836	36.2951	100.091	1133.44	19.9992	0.0020152								67058-65	K17-133.5	37	2019-10-16	14.5667	3654081000	Heizler, M	DetritalSanidine	24	Heizler01192		localhost	7.875	Ar41 = A, deleting t<30 @ 10/17/19 8:30 AM; Ar40 = L @ 10/17/19 8:30 AM; Ar39 = L @ 10/17/19 8:30 AM; Ar38 = L @ 10/17/19 8:30 AM; Ar37 = L @ 10/17/19 8:30 AM; Ar36 = L @ 10/17/19 8:30 AM; Ar41 bk val,er = @ 10/17/19 8:35 AM; Average background @ 10/17/19 8:35 AM; Ar40 bk val,er = @ 10/17/19 8:35 AM; Line-segment interpolation @ 10/17/19 8:35 AM; Ar39 bk val,er = @ 10/17/19 8:35 AM; Average backg…	B:24 DS	ALLLLLAAAAAA	1	Pychron Script	1	Fusions CO2	3	0	0	0	0	30	30	155			0
x	38	3	450.163	0.0838501	-3.4151	0.0373855	6.08472	100.226	1135.78	21.485	0.0012293								67058-38	K17-133.5	37	2019-10-08	16.2333	3653396000	Heizler, M	DetritalSanidine	24	Heizler01192		localhost	7.875	Ar41 bk val,er = @ 10/14/19 9:15 AM; Average background @ 10/14/19 9:15 AM; Ar40 bk val,er = @ 10/14/19 9:15 AM; Line-segment interpolation @ 10/14/19 9:15 AM; Ar39 bk val,er = @ 10/14/19 9:15 AM; Average background @ 10/14/19 9:15 AM; Ar38 bk val,er = @ 10/14/19 9:15 AM; Average background @ 10/14/19 9:15 AM; Ar37 bk val,er = @ 10/14/19 9:15 AM; Average background @ 10/14/19 9:15 AM; Ar36 bk val…	B:24 DS	ALLLLLAAAAAA	1	Pychron Script	1	Fusions CO2	3	0	0	0	0	30	30	120			0
x	150	3	452.941	0.0422434	1.5641	0.420999	12.0777	99.8988	1138.2	8.70112	0.0019153								67058-150	K17-133.5	37	2019-10-20	15.8833	3654432000	Heizler, M	DetritalSanidine	24	Heizler01192		localhost	7.875	Ar41 = A, deleting t<30 @ 10/21/19 12:42 PM; Ar40 = L @ 10/21/19 12:42 PM; Ar39 = L @ 10/21/19 12:42 PM; Ar38 = L @ 10/21/19 12:42 PM; Ar37 = L @ 10/21/19 12:42 PM; Ar36 = L @ 10/21/19 12:42 PM; Ar41 bk val,er = @ 10/21/19 12:47 PM; Average background @ 10/21/19 12:47 PM; Ar40 bk val,er = @ 10/21/19 12:47 PM; Line-segment interpolation @ 10/21/19 12:47 PM; Ar39 bk val,er = @ 10/21/19 12:47 PM; Av…	B:24 DS	ALLLLLAAAAAA	1	Pychron Script	1	Fusions CO2	3	0	0	0	0	30	30	156			0
x	27	3	469.758	0.0195124	9.7344	0.0738545	26.1477	99.3881	1164.96	11.3866	0.0012293								67058-27	K17-133.5	37	2019-10-08	14.7667	3653391000	Heizler, M	DetritalSanidine	24	Heizler01192		localhost	7.875	Ar41 bk val,er = @ 10/14/19 9:15 AM; Average background @ 10/14/19 9:15 AM; Ar40 bk val,er = @ 10/14/19 9:15 AM; Line-segment interpolation @ 10/14/19 9:15 AM; Ar39 bk val,er = @ 10/14/19 9:15 AM; Average background @ 10/14/19 9:15 AM; Ar38 bk val,er = @ 10/14/19 9:15 AM; Average background @ 10/14/19 9:15 AM; Ar37 bk val,er = @ 10/14/19 9:15 AM; Average background @ 10/14/19 9:15 AM; Ar36 bk val…	B:24 DS	ALLLLLAAAAAA	1	Pychron Script	1	Fusions CO2	3	0	0	0	0	30	30	109			0
x	11	3	519.271	0.122714	-0.257	0.0347506	4.15765	100.016	1259.41	21.4016	0.0012293								67058-11	K17-133.5	37	2019-10-08	9.36667	3653371000	Heizler, M	DetritalSanidine	24	Heizler01192		localhost	7.875	Ar41 bk val,er = @ 10/14/19 9:15 AM; Average background @ 10/14/19 9:15 AM; Ar40 bk val,er = @ 10/14/19 9:15 AM; Line-segment interpolation @ 10/14/19 9:15 AM; Ar39 bk val,er = @ 10/14/19 9:15 AM; Average background @ 10/14/19 9:15 AM; Ar38 bk val,er = @ 10/14/19 9:15 AM; Average background @ 10/14/19 9:15 AM; Ar37 bk val,er = @ 10/14/19 9:15 AM; Average background @ 10/14/19 9:15 AM; Ar36 bk val…	B:24 DS	ALLLLLAAAAAA	1	Pychron Script	1	Fusions CO2	3	0	0	0	0	30	30	92			0
x	109	3	523.03	0.14724	-1.7562	0.0374009	3.46513	100.102	1266.79	20.7342	0.0020152								67058-109	K17-133.5	37	2019-10-16	21.1167	3654105000	Heizler, M	DetritalSanidine	24	Heizler01192		localhost	7.875	Ar41 = A, deleting t<30 @ 10/17/19 8:30 AM; Ar40 = L @ 10/17/19 8:30 AM; Ar39 = L @ 10/17/19 8:30 AM; Ar38 = L @ 10/17/19 8:30 AM; Ar37 = L @ 10/17/19 8:30 AM; Ar36 = L @ 10/17/19 8:30 AM; Ar41 bk val,er = @ 10/17/19 8:35 AM; Average background @ 10/17/19 8:35 AM; Ar40 bk val,er = @ 10/17/19 8:35 AM; Line-segment interpolation @ 10/17/19 8:35 AM; Ar39 bk val,er = @ 10/17/19 8:35 AM; Average backg…	B:24 DS	ALLLLLAAAAAA	1	Pychron Script	1	Fusions CO2	3	0	0	0	0	30	30	201			0
x	56	3	533.256	0.0108362	2.0375	0.253411	47.0833	99.8873	1282.51	12.4374	0.0012293								67058-56	K17-133.5	37	2019-10-08	18.7333	3653405000	Heizler, M	DetritalSanidine	24	Heizler01192		localhost	7.875	Ar41 bk val,er = @ 10/14/19 9:15 AM; Average background @ 10/14/19 9:15 AM; Ar40 bk val,er = @ 10/14/19 9:15 AM; Line-segment interpolation @ 10/14/19 9:15 AM; Ar39 bk val,er = @ 10/14/19 9:15 AM; Average background @ 10/14/19 9:15 AM; Ar38 bk val,er = @ 10/14/19 9:15 AM; Average background @ 10/14/19 9:15 AM; Ar37 bk val,er = @ 10/14/19 9:15 AM; Average background @ 10/14/19 9:15 AM; Ar36 bk val…	B:24 DS	ALLLLLAAAAAA	1	Pychron Script	1	Fusions CO2	3	0	0	0	0	30	30	138			0
x	64	3	557.774	-0.0006557	0.1819	0.0885039	-	99.9904	1325.39	11.2114	0.0020152								67058-64	K17-133.5	37	2019-10-16	14.4833	3654081000	Heizler, M	DetritalSanidine	24	Heizler01192		localhost	7.875	Ar41 = A, deleting t<30 @ 10/17/19 8:30 AM; Ar40 = L @ 10/17/19 8:30 AM; Ar39 = L @ 10/17/19 8:30 AM; Ar38 = L @ 10/17/19 8:30 AM; Ar37 = L @ 10/17/19 8:30 AM; Ar36 = L @ 10/17/19 8:30 AM; Ar41 bk val,er = @ 10/17/19 8:35 AM; Average background @ 10/17/19 8:35 AM; Ar40 bk val,er = @ 10/17/19 8:35 AM; Line-segment interpolation @ 10/17/19 8:35 AM; Ar39 bk val,er = @ 10/17/19 8:35 AM; Average backg…	B:24 DS	ALLLLLAAAAAA	1	Pychron Script	1	Fusions CO2	3	0	0	0	0	30	30	154			0
	Mean age ± 1s			n=2	MSWD=0.00				0.673956	0.021558
	Notes:
	Isotopic ratios corrected for blank, radioactive decay, and mass discrimination, not corrected for interfering reactions.
	Errors quoted for individual analyses include analytical error only, without interfering reaction or J uncertainties.
	Mean age is weighted mean age of Taylor (1982). Mean age error is weighted error
	of the mean (Taylor, 1982), multiplied by the root of the MSWD where MSWD>1, and also																		--- Atmospheric argon ratios and discrimination ---
	incorporates uncertainty in J factors and irradiation correction uncertainties.																		(40Ar/36Ar)atm	295.5 ± 0.1
	Iisotopic abundances after Steiger and Jäger (1977).																		(40Ar/38Ar)atm	1575 ± 2
	x preceding sample ID denotes analyses excluded from mean age calculations.																		Source of spectrometer discrimination value and error	Data file
	Ages calculated relative to FC-2 Fish Canyon Tuff sanidine interlaboratory standard at 28.201 Ma
	Decay Constant (LambdaK (total)) = 5.463e-10/a																		Source of spectrometer sensitivity value and error	Saved with run
	Correction factors:																		--- Source of J and use of J Adjustment Table ---
	(39Ar/37Ar)Ca = 0.000667 ± 0.000005																		Use J saved with run	TRUE
	(36Ar/37Ar)Ca = 0.000275 ± 0.0000020																		J adjustment table useage	Multiply times J
	(38Ar/39Ar)K = 0.0124
	(40Ar/39Ar)K = 0.000129 ± 8e-05																		--- Minor irradiation parameters (see also Irradiation Data File) ---
																			(38Ar/37Ar)Ca	0.0000196 ± 8.160000e-7
																			(38Ar/39Ar)K	0.0122 ± 0.000027
																			P(36Cl/38Cl)	295.5 ± 0
																			--- Decay constants ---
																			Lambda 40K epsilon	5.463000e-10 ± 5.810000e-11
																			Lambda 40K Beta	0 ± 4.962000e-10
																			Lambda 37Ar	0.01975 ± 5.463000e-10
																			Lambda 39Ar	7.068000e-6 ± 5.530500e-10
																			Lambda 36Cl	6.308000e-9 ± 5.543000e-10
																			--- Calculation options ---
																			Normalize gain	FALSE
																			Use volume fraction delivered to ms to normalize gain	FALSE
																			Always calculate without ratios	TRUE
																			Calc. %40Ar* as %40*/(40*+40Atm)	TRUE
																			Number of trials in Monte Carlo sim.	1
																			37Ar/39Ar calculation	Normal
																			H35Cl Correction	FALSE
																			--- Isotope curve fitting ---
																			Parabolic vs. Linear probability cutoff	0.05
																			Error envelope as 1 or 2 sigma	1
																			Delete outliers within cycles before fit	FALSE
																			Average cycles before fit	FALSE
																			Delete outliers after fit	TRUE
																			Number of iterations of deleting outliers after fit	1
																			Cutoff for detecting outliers, sigma	3
																			Method of centroid location is	mean
																			--- Files ---
																			Irradiation data file	Macintosh HD:Users:matthewheizler:KAr:Aux Data:J Adjustment Table
																			J Adjustment table	Macintosh HD:Users:matthewheizler:KAr:Aux Data:J Adjustment Table
[truncated: 142 more columns]

## Sheet: K17-133.5_1st
Run_ID	Sample	System	Run_Date	Run_Hour	Run_SecSince1904	PrincipalInvestigator	Material	Hole #	Project	Locality	File	Version	History	Comment	Fit_Type	Signal Norm.	Run Script	Fract_Deliv_To_MS	Heating_Dev	Pwr_Requested	Pwr_Achieved	Pwr_AchievedSD	Pwr_AchievedMax	OP_Temp	Tot_Dur_Heating	Dur_Heating_At_Req_Pwr	Holes	X_Y_Pos	Laser Scan File	Beam_Dia	Ar41_	Ar41_Er	Ar40_	Ar40_Er	Ar39_	Ar39_Er	Ar38_	Ar38_Er	Ar37_	Ar37_Er	Ar36_	Ar36_Er	Ar41_BslnCorOnly	Ar41_Er_BslnCorOnly	Ar40_BslnCorOnly	Ar40_Er_BslnCorOnly	Ar39_BslnCorOnly	Ar39_Er_BslnCorOnly	Ar38_BslnCorOnly
67058-01	K17-133.5	37	2019-10-08	8.41667	3653368000	Heizler, M	DetritalSanidine	24	Heizler01192		localhost	7.875	Ar41 bk val,er = @ 10/14/19 9:15 AM; Average background @ 10/14/19 9:15 AM; Ar40 bk val,er = @ 10/14/19 9:15 AM; Line-segment interpolation @ 10/14/19 9:15 AM; Ar39 bk val,er = @ 10/14/19 9:15 AM; Average background @ 10/14/19 9:15 AM; Ar38 bk val,er = @ 10/14/19 9:15 AM; Average background @ 10/14/19 9:15 AM; Ar37 bk val,er = @ 10/14/19 9:15 AM; Average background @ 10/14/19 9:15 AM; Ar36 bk val…	B:24 DS	ALLLLLAAAAAA	1	Pychron Script	1	Fusions CO2	3	0	0	0	0	30	30	82			0	0.0390731	0.0098512	172.257	0.0259033	19.3218	0.0132373	0.236575	0.0057732	0.0488351	0.0122232	0.0203364	0.0004021	0.0691975	0.0035468	173.087	0.0247579	19.3545	0.0126146	0.246445
67058-02	K17-133.5	37	2019-10-08	8.51667	3653368000	Heizler, M	DetritalSanidine	24	Heizler01192		localhost	7.875	Ar41 bk val,er = @ 10/14/19 9:15 AM; Average background @ 10/14/19 9:15 AM; Ar40 bk val,er = @ 10/14/19 9:15 AM; Line-segment interpolation @ 10/14/19 9:15 AM; Ar39 bk val,er = @ 10/14/19 9:15 AM; Average background @ 10/14/19 9:15 AM; Ar38 bk val,er = @ 10/14/19 9:15 AM; Average background @ 10/14/19 9:15 AM; Ar37 bk val,er = @ 10/14/19 9:15 AM; Average background @ 10/14/19 9:15 AM; Ar36 bk val…	B:24 DS	ALLLLLAAAAAA	1	Pychron Script	1	Fusions CO2	3	0	0	0	0	30	30	83			0	0.0406467	0.0125959	421.154	0.0589999	0.990208	0.0201046	0.0521009	0.011018	0.0013821	0.0142367	-4.1e-05	0.000306	0.0707711	0.0086135	421.989	0.0584993	1.02288	0.0197002	0.0619712
67058-03	K17-133.5	37	2019-10-08	8.58333	3653369000	Heizler, M	DetritalSanidine	24	Heizler01192		localhost	7.875	Ar41 bk val,er = @ 10/14/19 9:15 AM; Average background @ 10/14/19 9:15 AM; Ar40 bk val,er = @ 10/14/19 9:15 AM; Line-segment interpolation @ 10/14/19 9:15 AM; Ar39 bk val,er = @ 10/14/19 9:15 AM; Average background @ 10/14/19 9:15 AM; Ar38 bk val,er = @ 10/14/19 9:15 AM; Average background @ 10/14/19 9:15 AM; Ar37 bk val,er = @ 10/14/19 9:15 AM; Average background @ 10/14/19 9:15 AM; Ar36 bk val…	B:24 DS	ALLLLLAAAAAA	1	Pychron Script	1	Fusions CO2	3	0	0	0	0	30	30	84			0	0.132052	0.0200566	2107.11	0.354098	35.8133	0.110714	0.513242	0.037929	0.188795	0.0633069	0.0278889	0.0020881	0.162176	0.017827	2107.95	0.354013	35.846	0.110642	0.523113
67058-04	K17-133.5	37	2019-10-08	8.65	3653369000	Heizler, M	DetritalSanidine	24	Heizler01192		localhost	7.875	Ar41 bk val,er = @ 10/14/19 9:15 AM; Average background @ 10/14/19 9:15 AM; Ar40 bk val,er = @ 10/14/19 9:15 AM; Line-segment interpolation @ 10/14/19 9:15 AM; Ar39 bk val,er = @ 10/14/19 9:15 AM; Average background @ 10/14/19 9:15 AM; Ar38 bk val,er = @ 10/14/19 9:15 AM; Average background @ 10/14/19 9:15 AM; Ar37 bk val,er = @ 10/14/19 9:15 AM; Average background @ 10/14/19 9:15 AM; Ar36 bk val…	B:24 DS	ALLLLLAAAAAA	1	Pychron Script	1	Fusions CO2	3	0	0	0	0	30	30	85			0	0.249851	0.0379609	4184.14	1.19959	28.269	0.197401	0.754167	0.0672015	0.0441364	0.0882136	0.189884	0.0065873	0.279976	0.0368316	4184.99	1.19956	28.3017	0.19736	0.764037
67058-05	K17-133.5	37	2019-10-08	8.76667	3653369000	Heizler, M	DetritalSanidine	24	Heizler01192		localhost	7.875	Ar41 bk val,er = @ 10/14/19 9:15 AM; Average background @ 10/14/19 9:15 AM; Ar40 bk val,er = @ 10/14/19 9:15 AM; Line-segment interpolation @ 10/14/19 9:15 AM; Ar39 bk val,er = @ 10/14/19 9:15 AM; Average background @ 10/14/19 9:15 AM; Ar38 bk val,er = @ 10/14/19 9:15 AM; Average background @ 10/14/19 9:15 AM; Ar37 bk val,er = @ 10/14/19 9:15 AM; Average background @ 10/14/19 9:15 AM; Ar36 bk val…	B:24 DS	ALLLLLAAAAAA	1	Pychron Script	1	Fusions CO2	3	0	0	0	0	30	30	86			0	0.0379726	0.0097904	353.484	0.0329959	44.1256	0.0190457	0.547232	0.0067236	0.130857	0.0107484	0.0277406	0.0005425	0.068097	0.0033745	354.337	0.032008	44.1583	0.0186183	0.557103
67058-06	K17-133.5	37	2019-10-08	8.86667	3653370000	Heizler, M	DetritalSanidine	24	Heizler01192		localhost	7.875	Ar41 bk val,er = @ 10/14/19 9:15 AM; Average background @ 10/14/19 9:15 AM; Ar40 bk val,er = @ 10/14/19 9:15 AM; Line-segment interpolation @ 10/14/19 9:15 AM; Ar39 bk val,er = @ 10/14/19 9:15 AM; Average background @ 10/14/19 9:15 AM; Ar38 bk val,er = @ 10/14/19 9:15 AM; Average background @ 10/14/19 9:15 AM; Ar37 bk val,er = @ 10/14/19 9:15 AM; Average background @ 10/14/19 9:15 AM; Ar36 bk val…	B:24 DS	ALLLLLAAAAAA	1	Pychron Script	1	Fusions CO2	3	0	0	0	0	30	30	87			0	0.0578334	0.0108849	335.067	0.0596814	18.6081	0.0290486	0.261526	0.0120376	0.0237971	0.0172615	0.0161885	0.0006828	0.0879578	0.0058323	335.927	0.0591155	18.6408	0.0287702	0.271397
67058-07	K17-133.5	37	2019-10-08	8.96667	3653370000	Heizler, M	DetritalSanidine	24	Heizler01192		localhost	7.875	Ar41 bk val,er = @ 10/14/19 9:15 AM; Average background @ 10/14/19 9:15 AM; Ar40 bk val,er = @ 10/14/19 9:15 AM; Line-segment interpolation @ 10/14/19 9:15 AM; Ar39 bk val,er = @ 10/14/19 9:15 AM; Average background @ 10/14/19 9:15 AM; Ar38 bk val,er = @ 10/14/19 9:15 AM; Average background @ 10/14/19 9:15 AM; Ar37 bk val,er = @ 10/14/19 9:15 AM; Average background @ 10/14/19 9:15 AM; Ar36 bk val…	B:24 DS	ALLLLLAAAAAA	1	Pychron Script	1	Fusions CO2	3	0	0	0	0	30	30	88			0	0.0302929	0.010121	164.718	0.026053	20.8157	0.0172563	0.272262	0.0060518	0.0738513	0.0113788	0.037615	0.0005104	0.0604173	0.004239	165.585	0.0246415	20.8483	0.0167834	0.282132
67058-09	K17-133.5	37	2019-10-08	9.18333	3653371000	Heizler, M	DetritalSanidine	24	Heizler01192		localhost	7.875	Ar41 bk val,er = @ 10/14/19 9:15 AM; Average background @ 10/14/19 9:15 AM; Ar40 bk val,er = @ 10/14/19 9:15 AM; Line-segment interpolation @ 10/14/19 9:15 AM; Ar39 bk val,er = @ 10/14/19 9:15 AM; Average background @ 10/14/19 9:15 AM; Ar38 bk val,er = @ 10/14/19 9:15 AM; Average background @ 10/14/19 9:15 AM; Ar37 bk val,er = @ 10/14/19 9:15 AM; Average background @ 10/14/19 9:15 AM; Ar36 bk val…	B:24 DS	ALLLLLAAAAAA	1	Pychron Script	1	Fusions CO2	3	0	0	0	0	30	30	90			0	0.0285741	0.0098202	134.952	0.0239922	15.1	0.0162626	0.189095	0.0074227	0.122262	0.0128423	0.02847	0.0005958	0.0586985	0.0034599	135.835	0.0222104	15.1326	0.0157599	0.198965
67058-10	K17-133.5	37	2019-10-08	9.26667	3653371000	Heizler, M	DetritalSanidine	24	Heizler01192		localhost	7.875	Ar41 bk val,er = @ 10/14/19 9:15 AM; Average background @ 10/14/19 9:15 AM; Ar40 bk val,er = @ 10/14/19 9:15 AM; Line-segment interpolation @ 10/14/19 9:15 AM; Ar39 bk val,er = @ 10/14/19 9:15 AM; Average background @ 10/14/19 9:15 AM; Ar38 bk val,er = @ 10/14/19 9:15 AM; Average background @ 10/14/19 9:15 AM; Ar37 bk val,er = @ 10/14/19 9:15 AM; Average background @ 10/14/19 9:15 AM; Ar36 bk val…	B:24 DS	ALLLLLAAAAAA	1	Pychron Script	1	Fusions CO2	3	0	0	0	0	30	30	91			0	0.0631722	0.0120907	415.3	0.0671261	8.17872	0.0207066	0.106587	0.0108351	0.0131298	0.0204506	0.0205293	0.0008943	0.0932966	0.0078562	416.188	0.0664679	8.21139	0.0203142	0.116457
67058-11	K17-133.5	37	2019-10-08	9.36667	3653371000	Heizler, M	DetritalSanidine	24	Heizler01192		localhost	7.875	Ar41 bk val,er = @ 10/14/19 9:15 AM; Average background @ 10/14/19 9:15 AM; Ar40 bk val,er = @ 10/14/19 9:15 AM; Line-segment interpolation @ 10/14/19 9:15 AM; Ar39 bk val,er = @ 10/14/19 9:15 AM; Average background @ 10/14/19 9:15 AM; Ar38 bk val,er = @ 10/14/19 9:15 AM; Average background @ 10/14/19 9:15 AM; Ar37 bk val,er = @ 10/14/19 9:15 AM; Average background @ 10/14/19 9:15 AM; Ar36 bk val…	B:24 DS	ALLLLLAAAAAA	1	Pychron Script	1	Fusions CO2	3	0	0	0	0	30	30	92			0	0.047109	0.0138646	360.929	0.0448466	0.694872	0.0163295	0.0101285	0.0081212	0.0385984	0.0156992	-0.0001786	0.0003734	0.0772334	0.0103808	361.824	0.043788	0.72754	0.0158289	0.0199988
67058-12	K17-133.5	37	2019-10-08	9.58333	3653372000	Heizler, M	DetritalSanidine	24	Heizler01192		localhost	7.875	Ar41 bk val,er = @ 10/14/19 9:15 AM; Average background @ 10/14/19 9:15 AM; Ar40 bk val,er = @ 10/14/19 9:15 AM; Line-segment interpolation @ 10/14/19 9:15 AM; Ar39 bk val,er = @ 10/14/19 9:15 AM; Average background @ 10/14/19 9:15 AM; Ar38 bk val,er = @ 10/14/19 9:15 AM; Average background @ 10/14/19 9:15 AM; Ar37 bk val,er = @ 10/14/19 9:15 AM; Average background @ 10/14/19 9:15 AM; Ar36 bk val…	B:24 DS	ALLLLLAAAAAA	1	Pychron Script	1	Fusions CO2	3	0	0	0	0	30	30	93			0	0.138712	0.018894	2452.53	0.314672	21.7716	0.0763222	0.437416	0.0284885	-0.0010355	0.0405532	0.201186	0.0056924	0.168837	0.0165081	2453.4	0.314535	21.8043	0.0762166	0.447287
67058-13	K17-133.5	37	2019-10-08	9.68333	3653372000	Heizler, M	DetritalSanidine	24	Heizler01192		localhost	7.875	Ar41 bk val,er = @ 10/14/19 9:15 AM; Average background @ 10/14/19 9:15 AM; Ar40 bk val,er = @ 10/14/19 9:15 AM; Line-segment interpolation @ 10/14/19 9:15 AM; Ar39 bk val,er = @ 10/14/19 9:15 AM; Average background @ 10/14/19 9:15 AM; Ar38 bk val,er = @ 10/14/19 9:15 AM; Average background @ 10/14/19 9:15 AM; Ar37 bk val,er = @ 10/14/19 9:15 AM; Average background @ 10/14/19 9:15 AM; Ar36 bk val…	B:24 DS	ALLLLLAAAAAA	1	Pychron Script	1	Fusions CO2	3	0	0	0	0	30	30	94			0	0.063429	0.0109966	890.794	0.0970794	9.65244	0.030338	0.164356	0.0110196	0.0548803	0.0186061	0.103558	0.0014023	0.0935534	0.0060382	891.638	0.0967264	9.68511	0.0300716	0.174227
67058-14	K17-133.5	37	2019-10-08	12.6833	3653383000	Heizler, M	DetritalSanidine	24	Heizler01192		localhost	7.875	Ar41 bk val,er = @ 10/14/19 9:15 AM; Average background @ 10/14/19 9:15 AM; Ar40 bk val,er = @ 10/14/19 9:15 AM; Line-segment interpolation @ 10/14/19 9:15 AM; Ar39 bk val,er = @ 10/14/19 9:15 AM; Average background @ 10/14/19 9:15 AM; Ar38 bk val,er = @ 10/14/19 9:15 AM; Average background @ 10/14/19 9:15 AM; Ar37 bk val,er = @ 10/14/19 9:15 AM; Average background @ 10/14/19 9:15 AM; Ar36 bk val…	B:24 DS	ALLLLLAAAAAA	1	Pychron Script	1	Fusions CO2	3	0	0	0	0	30	30	95			0	0.0666246	0.0110551	1022.24	0.100568	11.2233	0.0245124	0.160822	0.0093479	0.0140631	0.0177126	0.043875	0.0010386	0.096749	0.0061441	1023.18	0.100267	11.256	0.0241818	0.170693
67058-15	K17-133.5	37	2019-10-08	12.7833	3653384000	Heizler, M	DetritalSanidine	24	Heizler01192		localhost	7.875	Ar41 bk val,er = @ 10/14/19 9:15 AM; Average background @ 10/14/19 9:15 AM; Ar40 bk val,er = @ 10/14/19 9:15 AM; Line-segment interpolation @ 10/14/19 9:15 AM; Ar39 bk val,er = @ 10/14/19 9:15 AM; Average background @ 10/14/19 9:15 AM; Ar38 bk val,er = @ 10/14/19 9:15 AM; Average background @ 10/14/19 9:15 AM; Ar37 bk val,er = @ 10/14/19 9:15 AM; Average background @ 10/14/19 9:15 AM; Ar36 bk val…	B:24 DS	ALLLLLAAAAAA	1	Pychron Script	1	Fusions CO2	3	0	0	0	0	30	30	96			0	0.0518056	0.0111137	543.342	0.0868781	10.7192	0.0227927	0.155625	0.0103195	0.0830971	0.0209155	0.0055895	0.0005527	0.08193	0.0062489	544.295	0.0865265	10.7519	0.0224367	0.165495
67058-16	K17-133.5	37	2019-10-08	12.8667	3653384000	Heizler, M	DetritalSanidine	24	Heizler01192		localhost	7.875	Ar41 bk val,er = @ 10/14/19 9:15 AM; Average background @ 10/14/19 9:15 AM; Ar40 bk val,er = @ 10/14/19 9:15 AM; Line-segment interpolation @ 10/14/19 9:15 AM; Ar39 bk val,er = @ 10/14/19 9:15 AM; Average background @ 10/14/19 9:15 AM; Ar38 bk val,er = @ 10/14/19 9:15 AM; Average background @ 10/14/19 9:15 AM; Ar37 bk val,er = @ 10/14/19 9:15 AM; Average background @ 10/14/19 9:15 AM; Ar36 bk val…	B:24 DS	ALLLLLAAAAAA	1	Pychron Script	1	Fusions CO2	3	0	0	0	0	30	30	97			0	0.135234	0.0209529	1833.25	0.387873	33.0214	0.0623783	0.526852	0.0295073	0.193385	0.0577632	0.0446118	0.0018347	0.165358	0.0188297	1834.21	0.387793	33.0541	0.0622491	0.536722
67058-18	K17-133.5	37	2019-10-08	13.0833	3653385000	Heizler, M	DetritalSanidine	24	Heizler01192		localhost	7.875	Ar41 bk val,er = @ 10/14/19 9:15 AM; Average background @ 10/14/19 9:15 AM; Ar40 bk val,er = @ 10/14/19 9:15 AM; Line-segment interpolation @ 10/14/19 9:15 AM; Ar39 bk val,er = @ 10/14/19 9:15 AM; Average background @ 10/14/19 9:15 AM; Ar38 bk val,er = @ 10/14/19 9:15 AM; Average background @ 10/14/19 9:15 AM; Ar37 bk val,er = @ 10/14/19 9:15 AM; Average background @ 10/14/19 9:15 AM; Ar36 bk val…	B:24 DS	ALLLLLAAAAAA	1	Pychron Script	1	Fusions CO2	3	0	0	0	0	30	30	99			0	0.0285591	0.0095717	181.882	0.0258463	20.3091	0.0162504	0.273347	0.0058195	0.0560614	0.0097663	0.0231782	0.0004924	0.0586835	0.0026745	182.871	0.0245893	20.3418	0.0157473	0.283217
67058-19	K17-133.5	37	2019-10-08	13.2	3653385000	Heizler, M	DetritalSanidine	24	Heizler01192		localhost	7.875	Ar41 bk val,er = @ 10/14/19 9:15 AM; Average background @ 10/14/19 9:15 AM; Ar40 bk val,er = @ 10/14/19 9:15 AM; Line-segment interpolation @ 10/14/19 9:15 AM; Ar39 bk val,er = @ 10/14/19 9:15 AM; Average background @ 10/14/19 9:15 AM; Ar38 bk val,er = @ 10/14/19 9:15 AM; Average background @ 10/14/19 9:15 AM; Ar37 bk val,er = @ 10/14/19 9:15 AM; Average background @ 10/14/19 9:15 AM; Ar36 bk val…	B:24 DS	ALLLLLAAAAAA	1	Pychron Script	1	Fusions CO2	3	0	0	0	0	30	30	100			0	0.0372746	0.0097004	360.656	0.0425732	43.5769	0.0198771	0.525543	0.0065678	0.299539	0.0122091	0.0434254	0.0006082	0.067399	0.0031035	361.661	0.0418036	43.6095	0.019468	0.535414
67058-20	K17-133.5	37	2019-10-08	13.3167	3653386000	Heizler, M	DetritalSanidine	24	Heizler01192		localhost	7.875	Ar41 bk val,er = @ 10/14/19 9:15 AM; Average background @ 10/14/19 9:15 AM; Ar40 bk val,er = @ 10/14/19 9:15 AM; Line-segment interpolation @ 10/14/19 9:15 AM; Ar39 bk val,er = @ 10/14/19 9:15 AM; Average background @ 10/14/19 9:15 AM; Ar38 bk val,er = @ 10/14/19 9:15 AM; Average background @ 10/14/19 9:15 AM; Ar37 bk val,er = @ 10/14/19 9:15 AM; Average background @ 10/14/19 9:15 AM; Ar36 bk val…	B:24 DS	ALLLLLAAAAAA	1	Pychron Script	1	Fusions CO2	3	0	0	0	0	30	30	101			0	0.0610665	0.0112801	563.81	0.0745691	36.835	0.0322681	0.457186	0.0109481	0.0632225	0.0190128	0.0232528	0.0006357	0.0911909	0.0065402	564.828	0.0741219	36.8677	0.0320177	0.467056
67058-21	K17-133.5	37	2019-10-08	13.9833	3653388000	Heizler, M	DetritalSanidine	24	Heizler01192		localhost	7.875	Ar41 bk val,er = @ 10/14/19 9:15 AM; Average background @ 10/14/19 9:15 AM; Ar40 bk val,er = @ 10/14/19 9:15 AM; Line-segment interpolation @ 10/14/19 9:15 AM; Ar39 bk val,er = @ 10/14/19 9:15 AM; Average background @ 10/14/19 9:15 AM; Ar38 bk val,er = @ 10/14/19 9:15 AM; Average background @ 10/14/19 9:15 AM; Ar37 bk val,er = @ 10/14/19 9:15 AM; Average background @ 10/14/19 9:15 AM; Ar36 bk val…	B:24 DS	ALLLLLAAAAAA	1	Pychron Script	1	Fusions CO2	3	0	0	0	0	30	30	103			0	0.0352614	0.0107857	146.388	0.0428558	9.70785	0.0235781	0.160758	0.0128537	0.0524678	0.0176109	0.0500869	0.0009133	0.0653858	0.005645	147.488	0.0418882	9.74051	0.0232343	0.170628
67058-22	K17-133.5	37	2019-10-08	14.0833	3653388000	Heizler, M	DetritalSanidine	24	Heizler01192		localhost	7.875	Ar41 bk val,er = @ 10/14/19 9:15 AM; Average background @ 10/14/19 9:15 AM; Ar40 bk val,er = @ 10/14/19 9:15 AM; Line-segment interpolation @ 10/14/19 9:15 AM; Ar39 bk val,er = @ 10/14/19 9:15 AM; Average background @ 10/14/19 9:15 AM; Ar38 bk val,er = @ 10/14/19 9:15 AM; Average background @ 10/14/19 9:15 AM; Ar37 bk val,er = @ 10/14/19 9:15 AM; Average background @ 10/14/19 9:15 AM; Ar36 bk val…	B:24 DS	ALLLLLAAAAAA	1	Pychron Script	1	Fusions CO2	3	0	0	0	0	30	30	104			0	0.0425273	0.0110347	476.445	0.0766774	26.1832	0.029243	0.358446	0.0113942	0.0616877	0.0162126	0.0174336	0.0007435	0.0726517	0.0061073	477.557	0.0761203	26.2159	0.0289664	0.368316
67058-23	K17-133.5	37	2019-10-08	14.1833	3653389000	Heizler, M	DetritalSanidine	24	Heizler01192		localhost	7.875	Ar41 bk val,er = @ 10/14/19 9:15 AM; Average background @ 10/14/19 9:15 AM; Ar40 bk val,er = @ 10/14/19 9:15 AM; Line-segment interpolation @ 10/14/19 9:15 AM; Ar39 bk val,er = @ 10/14/19 9:15 AM; Average background @ 10/14/19 9:15 AM; Ar38 bk val,er = @ 10/14/19 9:15 AM; Average background @ 10/14/19 9:15 AM; Ar37 bk val,er = @ 10/14/19 9:15 AM; Average background @ 10/14/19 9:15 AM; Ar36 bk val…	B:24 DS	ALLLLLAAAAAA	1	Pychron Script	1	Fusions CO2	3	0	0	0	0	30	30	105			0	0.0489984	0.0106831	315.432	0.0498229	15.2017	0.0301246	0.237359	0.0120242	0.025372	0.0200201	0.0171723	0.000584	0.0791228	0.0054464	316.555	0.048929	15.2343	0.0298563	0.247229
67058-24	K17-133.5	37	2019-10-08	14.45	3653390000	Heizler, M	DetritalSanidine	24	Heizler01192		localhost	7.875	Ar41 bk val,er = @ 10/14/19 9:15 AM; Average background @ 10/14/19 9:15 AM; Ar40 bk val,er = @ 10/14/19 9:15 AM; Line-segment interpolation @ 10/14/19 9:15 AM; Ar39 bk val,er = @ 10/14/19 9:15 AM; Average background @ 10/14/19 9:15 AM; Ar38 bk val,er = @ 10/14/19 9:15 AM; Average background @ 10/14/19 9:15 AM; Ar37 bk val,er = @ 10/14/19 9:15 AM; Average background @ 10/14/19 9:15 AM; Ar36 bk val…	B:24 DS	ALLLLLAAAAAA	1	Pychron Script	1	Fusions CO2	3	0	0	0	0	30	30	106			0	0.0406378	0.0122615	303.351	0.0433472	0.674496	0.0185729	0.0139942	0.0091499	0.041952	0.0171348	0.0027876	0.0004462	0.0707622	0.0081165	304.508	0.0421983	0.707164	0.0181344	0.0238645
67058-25	K17-133.5	37	2019-10-08	14.5667	3653390000	Heizler, M	DetritalSanidine	24	Heizler01192		localhost	7.875	Ar41 bk val,er = @ 10/14/19 9:15 AM; Average background @ 10/14/19 9:15 AM; Ar40 bk val,er = @ 10/14/19 9:15 AM; Line-segment interpolation @ 10/14/19 9:15 AM; Ar39 bk val,er = @ 10/14/19 9:15 AM; Average background @ 10/14/19 9:15 AM; Ar38 bk val,er = @ 10/14/19 9:15 AM; Average background @ 10/14/19 9:15 AM; Ar37 bk val,er = @ 10/14/19 9:15 AM; Average background @ 10/14/19 9:15 AM; Ar36 bk val…	B:24 DS	ALLLLLAAAAAA	1	Pychron Script	1	Fusions CO2	3	0	0	0	0	30	30	107			0	0.0403458	0.0097612	322.589	0.0339294	29.3165	0.0181406	0.347811	0.0068701	0.078983	0.012814	0.0237723	0.000481	0.0704702	0.0032886	323.76	0.0323763	29.3491	0.0176913	0.357681
67058-26	K17-133.5	37	2019-10-08	14.6667	3653390000	Heizler, M	DetritalSanidine	24	Heizler01192		localhost	7.875	Ar41 bk val,er = @ 10/14/19 9:15 AM; Average background @ 10/14/19 9:15 AM; Ar40 bk val,er = @ 10/14/19 9:15 AM; Line-segment interpolation @ 10/14/19 9:15 AM; Ar39 bk val,er = @ 10/14/19 9:15 AM; Average background @ 10/14/19 9:15 AM; Ar38 bk val,er = @ 10/14/19 9:15 AM; Average background @ 10/14/19 9:15 AM; Ar37 bk val,er = @ 10/14/19 9:15 AM; Average background @ 10/14/19 9:15 AM; Ar36 bk val…	B:24 DS	ALLLLLAAAAAA	1	Pychron Script	1	Fusions CO2	3	0	0	0	0	30	30	108			0	0.0752139	0.010667	1310.38	0.113036	30.4637	0.0279748	0.388087	0.0111382	0.0896842	0.0172641	0.0316231	0.0008595	0.105338	0.0054147	1311.56	0.112561	30.4963	0.0276856	0.397957
67058-27	K17-133.5	37	2019-10-08	14.7667	3653391000	Heizler, M	DetritalSanidine	24	Heizler01192		localhost	7.875	Ar41 bk val,er = @ 10/14/19 9:15 AM; Average background @ 10/14/19 9:15 AM; Ar40 bk val,er = @ 10/14/19 9:15 AM; Line-segment interpolation @ 10/14/19 9:15 AM; Ar39 bk val,er = @ 10/14/19 9:15 AM; Average background @ 10/14/19 9:15 AM; Ar38 bk val,er = @ 10/14/19 9:15 AM; Average background @ 10/14/19 9:15 AM; Ar37 bk val,er = @ 10/14/19 9:15 AM; Average background @ 10/14/19 9:15 AM; Ar36 bk val…	B:24 DS	ALLLLLAAAAAA	1	Pychron Script	1	Fusions CO2	3	0	0	0	0	30	30	109			0	0.0560161	0.0150609	693.884	0.0769108	1.47669	0.0195063	0.0627103	0.0115604	0.0129849	0.0139579	0.0143788	0.0005313	0.0861405	0.0119317	695.08	0.0761796	1.50936	0.0190892	0.0725806
67058-28	K17-133.5	37	2019-10-08	14.8833	3653391000	Heizler, M	DetritalSanidine	24	Heizler01192		localhost	7.875	Ar41 bk val,er = @ 10/14/19 9:15 AM; Average background @ 10/14/19 9:15 AM; Ar40 bk val,er = @ 10/14/19 9:15 AM; Line-segment interpolation @ 10/14/19 9:15 AM; Ar39 bk val,er = @ 10/14/19 9:15 AM; Average background @ 10/14/19 9:15 AM; Ar38 bk val,er = @ 10/14/19 9:15 AM; Average background @ 10/14/19 9:15 AM; Ar37 bk val,er = @ 10/14/19 9:15 AM; Average background @ 10/14/19 9:15 AM; Ar36 bk val…	B:24 DS	ALLLLLAAAAAA	1	Pychron Script	1	Fusions CO2	3	0	0	0	0	30	30	110			0	0.0385991	0.0096671	521.72	0.0453759	41.0119	0.0168386	0.569963	0.0064787	0.190699	0.0107091	0.39235	0.0017714	0.0687235	0.002998	522.93	0.0440632	41.0445	0.0163536	0.579833
67058-29	K17-133.5	37	2019-10-08	15.3	3653393000	Heizler, M	DetritalSanidine	24	Heizler01192		localhost	7.875	Ar41 bk val,er = @ 10/14/19 9:15 AM; Average background @ 10/14/19 9:15 AM; Ar40 bk val,er = @ 10/14/19 9:15 AM; Line-segment interpolation @ 10/14/19 9:15 AM; Ar39 bk val,er = @ 10/14/19 9:15 AM; Average background @ 10/14/19 9:15 AM; Ar38 bk val,er = @ 10/14/19 9:15 AM; Average background @ 10/14/19 9:15 AM; Ar37 bk val,er = @ 10/14/19 9:15 AM; Average background @ 10/14/19 9:15 AM; Ar36 bk val…	B:24 DS	ALLLLLAAAAAA	1	Pychron Script	1	Fusions CO2	3	0	0	0	0	30	30	111			0	0.0216709	0.0097034	184.671	0.0222056	19.4276	0.016059	0.259526	0.0067363	0.0929305	0.0109988	0.0957018	0.0008721	0.0517953	0.0031128	185.941	0.0198069	19.4603	0.0155497	0.269396
67058-30	K17-133.5	37	2019-10-08	15.4333	3653393000	Heizler, M	DetritalSanidine	24	Heizler01192		localhost	7.875	Ar41 bk val,er = @ 10/14/19 9:15 AM; Average background @ 10/14/19 9:15 AM; Ar40 bk val,er = @ 10/14/19 9:15 AM; Line-segment interpolation @ 10/14/19 9:15 AM; Ar39 bk val,er = @ 10/14/19 9:15 AM; Average background @ 10/14/19 9:15 AM; Ar38 bk val,er = @ 10/14/19 9:15 AM; Average background @ 10/14/19 9:15 AM; Ar37 bk val,er = @ 10/14/19 9:15 AM; Average background @ 10/14/19 9:15 AM; Ar36 bk val…	B:24 DS	ALLLLLAAAAAA	1	Pychron Script	1	Fusions CO2	3	0	0	0	0	30	30	112			0	0.0230259	0.009812	202.563	0.0295872	24.86	0.015998	0.318788	0.005737	0.103304	0.0100302	0.0062986	0.0003858	0.0531503	0.0034365	203.852	0.0280138	24.8927	0.0154867	0.328658
67058-31	K17-133.5	37	2019-10-08	15.55	3653394000	Heizler, M	DetritalSanidine	24	Heizler01192		localhost	7.875	Ar41 bk val,er = @ 10/14/19 9:15 AM; Average background @ 10/14/19 9:15 AM; Ar40 bk val,er = @ 10/14/19 9:15 AM; Line-segment interpolation @ 10/14/19 9:15 AM; Ar39 bk val,er = @ 10/14/19 9:15 AM; Average background @ 10/14/19 9:15 AM; Ar38 bk val,er = @ 10/14/19 9:15 AM; Average background @ 10/14/19 9:15 AM; Ar37 bk val,er = @ 10/14/19 9:15 AM; Average background @ 10/14/19 9:15 AM; Ar36 bk val…	B:24 DS	ALLLLLAAAAAA	1	Pychron Script	1	Fusions CO2	3	0	0	0	0	30	30	113			0	0.0317397	0.0096366	209.538	0.0300323	29.6224	0.0179774	0.374258	0.0055233	0.08728	0.0098493	0.0153984	0.0004582	0.0618641	0.0028981	210.846	0.0286228	29.655	0.0175239	0.384128
67058-32	K17-133.5	37	2019-10-08	15.65	3653394000	Heizler, M	DetritalSanidine	24	Heizler01192		localhost	7.875	Ar41 bk val,er = @ 10/14/19 9:15 AM; Average background @ 10/14/19 9:15 AM; Ar40 bk val,er = @ 10/14/19 9:15 AM; Line-segment interpolation @ 10/14/19 9:15 AM; Ar39 bk val,er = @ 10/14/19 9:15 AM; Average background @ 10/14/19 9:15 AM; Ar38 bk val,er = @ 10/14/19 9:15 AM; Average background @ 10/14/19 9:15 AM; Ar37 bk val,er = @ 10/14/19 9:15 AM; Average background @ 10/14/19 9:15 AM; Ar36 bk val…	B:24 DS	ALLLLLAAAAAA	1	Pychron Script	1	Fusions CO2	3	0	0	0	0	30	30	114			0	0.0628943	0.0102271	1129.98	0.07604	22.9698	0.0223115	0.308977	0.009394	0.0877163	0.0169393	0.026497	0.0008208	0.0930187	0.0044863	1131.3	0.0755319	23.0025	0.0219478	0.318847
67058-33	K17-133.5	37	2019-10-08	15.7333	3653394000	Heizler, M	DetritalSanidine	24	Heizler01192		localhost	7.875	Ar41 bk val,er = @ 10/14/19 9:15 AM; Average background @ 10/14/19 9:15 AM; Ar40 bk val,er = @ 10/14/19 9:15 AM; Line-segment interpolation @ 10/14/19 9:15 AM; Ar39 bk val,er = @ 10/14/19 9:15 AM; Average background @ 10/14/19 9:15 AM; Ar38 bk val,er = @ 10/14/19 9:15 AM; Average background @ 10/14/19 9:15 AM; Ar37 bk val,er = @ 10/14/19 9:15 AM; Average background @ 10/14/19 9:15 AM; Ar36 bk val…	B:24 DS	ALLLLLAAAAAA	1	Pychron Script	1	Fusions CO2	3	0	0	0	0	30	30	115			0	0.0463865	0.0108243	381.573	0.059049	27.0405	0.0296437	0.369221	0.0112791	0.149265	0.0177324	0.0126006	0.0005201	0.0765109	0.0057184	382.91	0.0584336	27.0732	0.029371	0.379091
67058-34	K17-133.5	37	2019-10-08	15.85	3653395000	Heizler, M	DetritalSanidine	24	Heizler01192		localhost	7.875	Ar41 bk val,er = @ 10/14/19 9:15 AM; Average background @ 10/14/19 9:15 AM; Ar40 bk val,er = @ 10/14/19 9:15 AM; Line-segment interpolation @ 10/14/19 9:15 AM; Ar39 bk val,er = @ 10/14/19 9:15 AM; Average background @ 10/14/19 9:15 AM; Ar38 bk val,er = @ 10/14/19 9:15 AM; Average background @ 10/14/19 9:15 AM; Ar37 bk val,er = @ 10/14/19 9:15 AM; Average background @ 10/14/19 9:15 AM; Ar36 bk val…	B:24 DS	ALLLLLAAAAAA	1	Pychron Script	1	Fusions CO2	3	0	0	0	0	30	30	116			0	0.0318218	0.0096976	222.726	0.0277463	21.9897	0.0159722	0.281732	0.006244	0.0928413	0.0111256	0.0199995	0.0004946	0.0619462	0.0030947	224.081	0.0264975	22.0224	0.01546	0.291602
67058-35	K17-133.5	37	2019-10-08	15.95	3653395000	Heizler, M	DetritalSanidine	24	Heizler01192		localhost	7.875	Ar41 bk val,er = @ 10/14/19 9:15 AM; Average background @ 10/14/19 9:15 AM; Ar40 bk val,er = @ 10/14/19 9:15 AM; Line-segment interpolation @ 10/14/19 9:15 AM; Ar39 bk val,er = @ 10/14/19 9:15 AM; Average background @ 10/14/19 9:15 AM; Ar38 bk val,er = @ 10/14/19 9:15 AM; Average background @ 10/14/19 9:15 AM; Ar37 bk val,er = @ 10/14/19 9:15 AM; Average background @ 10/14/19 9:15 AM; Ar36 bk val…	B:24 DS	ALLLLLAAAAAA	1	Pychron Script	1	Fusions CO2	3	0	0	0	0	30	30	117			0	0.0537178	0.0109706	352.599	0.0572555	19.9616	0.0269908	0.283465	0.0108072	0.0717856	0.0169144	0.0151803	0.0007013	0.0838422	0.0059906	353.969	0.0566862	19.9943	0.0266909	0.293335
67058-36	K17-133.5	37	2019-10-08	16.05	3653395000	Heizler, M	DetritalSanidine	24	Heizler01192		localhost	7.875	Ar41 bk val,er = @ 10/14/19 9:15 AM; Average background @ 10/14/19 9:15 AM; Ar40 bk val,er = @ 10/14/19 9:15 AM; Line-segment interpolation @ 10/14/19 9:15 AM; Ar39 bk val,er = @ 10/14/19 9:15 AM; Average background @ 10/14/19 9:15 AM; Ar38 bk val,er = @ 10/14/19 9:15 AM; Average background @ 10/14/19 9:15 AM; Ar37 bk val,er = @ 10/14/19 9:15 AM; Average background @ 10/14/19 9:15 AM; Ar36 bk val…	B:24 DS	ALLLLLAAAAAA	1	Pychron Script	1	Fusions CO2	3	0	0	0	0	30	30	118			0	0.0611109	0.0142036	769.005	0.0679248	1.87163	0.0171592	0.0413263	0.0105492	0.0265616	0.0161631	9.02e-05	0.0003996	0.0912353	0.0108294	770.389	0.0674602	1.9043	0.0166835	0.0511966
67058-37	K17-133.5	37	2019-10-08	16.1333	3653396000	Heizler, M	DetritalSanidine	24	Heizler01192		localhost	7.875	Ar41 bk val,er = @ 10/14/19 9:15 AM; Average background @ 10/14/19 9:15 AM; Ar40 bk val,er = @ 10/14/19 9:15 AM; Line-segment interpolation @ 10/14/19 9:15 AM; Ar39 bk val,er = @ 10/14/19 9:15 AM; Average background @ 10/14/19 9:15 AM; Ar38 bk val,er = @ 10/14/19 9:15 AM; Average background @ 10/14/19 9:15 AM; Ar37 bk val,er = @ 10/14/19 9:15 AM; Average background @ 10/14/19 9:15 AM; Ar36 bk val…	B:24 DS	ALLLLLAAAAAA	1	Pychron Script	1	Fusions CO2	3	0	0	0	0	30	30	119			0	0.156744	0.020509	2187.13	0.487592	44.1618	0.0885033	0.610736	0.025955	0.281812	0.0352304	0.0495844	0.0026792	0.186868	0.0183345	2188.53	0.487528	44.1945	0.0884123	0.620606
67058-38	K17-133.5	37	2019-10-08	16.2333	3653396000	Heizler, M	DetritalSanidine	24	Heizler01192		localhost	7.875	Ar41 bk val,er = @ 10/14/19 9:15 AM; Average background @ 10/14/19 9:15 AM; Ar40 bk val,er = @ 10/14/19 9:15 AM; Line-segment interpolation @ 10/14/19 9:15 AM; Ar39 bk val,er = @ 10/14/19 9:15 AM; Average background @ 10/14/19 9:15 AM; Ar38 bk val,er = @ 10/14/19 9:15 AM; Average background @ 10/14/19 9:15 AM; Ar37 bk val,er = @ 10/14/19 9:15 AM; Average background @ 10/14/19 9:15 AM; Ar36 bk val…	B:24 DS	ALLLLLAAAAAA	1	Pychron Script	1	Fusions CO2	3	0	0	0	0	30	30	120			0	0.0548543	0.0150243	336.61	0.0396941	0.747538	0.0189758	0.0367134	0.0107592	0.0282132	0.015774	-0.0025536	0.0003688	0.0849788	0.0118855	338.022	0.0389145	0.780205	0.0185467	0.0465837
67058-39	K17-133.5	37	2019-10-08	16.35	3653396000	Heizler, M	DetritalSanidine	24	Heizler01192		localhost	7.875	Ar41 bk val,er = @ 10/14/19 9:15 AM; Average background @ 10/14/19 9:15 AM; Ar40 bk val,er = @ 10/14/19 9:15 AM; Line-segment interpolation @ 10/14/19 9:15 AM; Ar39 bk val,er = @ 10/14/19 9:15 AM; Average background @ 10/14/19 9:15 AM; Ar38 bk val,er = @ 10/14/19 9:15 AM; Average background @ 10/14/19 9:15 AM; Ar37 bk val,er = @ 10/14/19 9:15 AM; Average background @ 10/14/19 9:15 AM; Ar36 bk val…	B:24 DS	ALLLLLAAAAAA	1	Pychron Script	1	Fusions CO2	3	0	0	0	0	30	30	121			0	0.0326578	0.0097488	147.522	0.0237852	12.6659	0.0158377	0.148878	0.0054719	0.0299967	0.0103671	0.0079261	0.0003673	0.0627822	0.0032516	148.952	0.0224486	12.6985	0.015321	0.158748
67058-40	K17-133.5	37	2019-10-08	16.4167	3653397000	Heizler, M	DetritalSanidine	24	Heizler01192		localhost	7.875	Ar41 bk val,er = @ 10/14/19 9:15 AM; Average background @ 10/14/19 9:15 AM; Ar40 bk val,er = @ 10/14/19 9:15 AM; Line-segment interpolation @ 10/14/19 9:15 AM; Ar39 bk val,er = @ 10/14/19 9:15 AM; Average background @ 10/14/19 9:15 AM; Ar38 bk val,er = @ 10/14/19 9:15 AM; Average background @ 10/14/19 9:15 AM; Ar37 bk val,er = @ 10/14/19 9:15 AM; Average background @ 10/14/19 9:15 AM; Ar36 bk val…	B:24 DS	ALLLLLAAAAAA	1	Pychron Script	1	Fusions CO2	3	0	0	0	0	30	30	122			0	0.141692	0.020486	1600.06	0.330992	23.8576	0.084266	0.391606	0.027517	0.108984	0.0494951	0.0219562	0.0013181	0.171817	0.0183087	1601.5	0.330897	23.8903	0.0841704	0.401476
67058-41	K17-133.5	37	2019-10-08	16.5167	3653397000	Heizler, M	DetritalSanidine	24	Heizler01192		localhost	7.875	Ar41 bk val,er = @ 10/14/19 9:15 AM; Average background @ 10/14/19 9:15 AM; Ar40 bk val,er = @ 10/14/19 9:15 AM; Line-segment interpolation @ 10/14/19 9:15 AM; Ar39 bk val,er = @ 10/14/19 9:15 AM; Average background @ 10/14/19 9:15 AM; Ar38 bk val,er = @ 10/14/19 9:15 AM; Average background @ 10/14/19 9:15 AM; Ar37 bk val,er = @ 10/14/19 9:15 AM; Average background @ 10/14/19 9:15 AM; Ar36 bk val…	B:24 DS	ALLLLLAAAAAA	1	Pychron Script	1	Fusions CO2	3	0	0	0	0	30	30	123			0	0.0676121	0.0108981	1017.76	0.100023	15.7076	0.0319839	0.224859	0.0125544	0.113625	0.0170557	0.0378874	0.0008717	0.0977365	0.005857	1019.22	0.099698	15.7403	0.0317312	0.23473
67058-42	K17-133.5	37	2019-10-08	16.6333	3653398000	Heizler, M	DetritalSanidine	24	Heizler01192		localhost	7.875	Ar41 bk val,er = @ 10/14/19 9:15 AM; Average background @ 10/14/19 9:15 AM; Ar40 bk val,er = @ 10/14/19 9:15 AM; Line-segment interpolation @ 10/14/19 9:15 AM; Ar39 bk val,er = @ 10/14/19 9:15 AM; Average background @ 10/14/19 9:15 AM; Ar38 bk val,er = @ 10/14/19 9:15 AM; Average background @ 10/14/19 9:15 AM; Ar37 bk val,er = @ 10/14/19 9:15 AM; Average background @ 10/14/19 9:15 AM; Ar36 bk val…	B:24 DS	ALLLLLAAAAAA	1	Pychron Script	1	Fusions CO2	3	0	0	0	0	30	30	124			0	0.0319773	0.0096527	243.45	0.0292528	27.5215	0.0165649	0.356166	0.0056079	0.110206	0.0130335	0.0176313	0.0004644	0.0621018	0.0029511	244.924	0.028058	27.5542	0.0160716	0.366036
67058-43	K17-133.5	37	2019-10-08	16.75	3653398000	Heizler, M	DetritalSanidine	24	Heizler01192		localhost	7.875	Ar41 bk val,er = @ 10/14/19 9:15 AM; Average background @ 10/14/19 9:15 AM; Ar40 bk val,er = @ 10/14/19 9:15 AM; Line-segment interpolation @ 10/14/19 9:15 AM; Ar39 bk val,er = @ 10/14/19 9:15 AM; Average background @ 10/14/19 9:15 AM; Ar38 bk val,er = @ 10/14/19 9:15 AM; Average background @ 10/14/19 9:15 AM; Ar37 bk val,er = @ 10/14/19 9:15 AM; Average background @ 10/14/19 9:15 AM; Ar36 bk val…	B:24 DS	ALLLLLAAAAAA	1	Pychron Script	1	Fusions CO2	3	0	0	0	0	30	30	125			0	0.0405665	0.0098746	438.618	0.043321	58.3841	0.0196104	0.714757	0.0056579	0.133869	0.0099062	0.0252633	0.0005377	0.0706909	0.0036114	440.111	0.042465	58.4168	0.0191956	0.724627
67058-44	K17-133.5	37	2019-10-08	17.0167	3653399000	Heizler, M	DetritalSanidine	24	Heizler01192		localhost	7.875	Ar41 bk val,er = @ 10/14/19 9:15 AM; Average background @ 10/14/19 9:15 AM; Ar40 bk val,er = @ 10/14/19 9:15 AM; Line-segment interpolation @ 10/14/19 9:15 AM; Ar39 bk val,er = @ 10/14/19 9:15 AM; Average background @ 10/14/19 9:15 AM; Ar38 bk val,er = @ 10/14/19 9:15 AM; Average background @ 10/14/19 9:15 AM; Ar37 bk val,er = @ 10/14/19 9:15 AM; Average background @ 10/14/19 9:15 AM; Ar36 bk val…	B:24 DS	ALLLLLAAAAAA	1	Pychron Script	1	Fusions CO2	3	0	0	0	0	30	30	126			0	0.0318065	0.0098271	2.62343	0.0160668	0.0972251	0.0146713	0.0231055	0.0068256	0.0057477	0.0102935	0.0039161	0.000386	0.0619309	0.0034793	4.15751	0.0129966	0.129893	0.014112	0.0329758
67058-45	K17-133.5	37	2019-10-08	17.1167	3653399000	Heizler, M	DetritalSanidine	24	Heizler01192		localhost	7.875	Ar41 bk val,er = @ 10/14/19 9:15 AM; Average background @ 10/14/19 9:15 AM; Ar40 bk val,er = @ 10/14/19 9:15 AM; Line-segment interpolation @ 10/14/19 9:15 AM; Ar39 bk val,er = @ 10/14/19 9:15 AM; Average background @ 10/14/19 9:15 AM; Ar38 bk val,er = @ 10/14/19 9:15 AM; Average background @ 10/14/19 9:15 AM; Ar37 bk val,er = @ 10/14/19 9:15 AM; Average background @ 10/14/19 9:15 AM; Ar36 bk val…	B:24 DS	ALLLLLAAAAAA	1	Pychron Script	1	Fusions CO2	3	0	0	0	0	30	30	127			0	0.146102	0.019334	2153.64	0.403508	32.2954	0.0762194	0.495349	0.0292193	0.148174	0.0405558	0.0473699	0.0020441	0.176227	0.01701	2155.19	0.403389	32.328	0.0761137	0.505219
67058-46	K17-133.5	37	2019-10-08	17.2167	3653400000	Heizler, M	DetritalSanidine	24	Heizler01192		localhost	7.875	Ar41 bk val,er = @ 10/14/19 9:15 AM; Average background @ 10/14/19 9:15 AM; Ar40 bk val,er = @ 10/14/19 9:15 AM; Line-segment interpolation @ 10/14/19 9:15 AM; Ar39 bk val,er = @ 10/14/19 9:15 AM; Average background @ 10/14/19 9:15 AM; Ar38 bk val,er = @ 10/14/19 9:15 AM; Average background @ 10/14/19 9:15 AM; Ar37 bk val,er = @ 10/14/19 9:15 AM; Average background @ 10/14/19 9:15 AM; Ar36 bk val…	B:24 DS	ALLLLLAAAAAA	1	Pychron Script	1	Fusions CO2	3	0	0	0	0	30	30	128			0	0.0676551	0.0107557	623.51	0.0715722	28.492	0.030449	0.362491	0.0115591	0.0006633	0.0208462	0.0595402	0.001127	0.0977795	0.0055874	625.074	0.0708387	28.5247	0.0301835	0.372361
67058-47	K17-133.5	37	2019-10-08	17.4667	3653400000	Heizler, M	DetritalSanidine	24	Heizler01192		localhost	7.875	Ar41 bk val,er = @ 10/14/19 9:15 AM; Average background @ 10/14/19 9:15 AM; Ar40 bk val,er = @ 10/14/19 9:15 AM; Line-segment interpolation @ 10/14/19 9:15 AM; Ar39 bk val,er = @ 10/14/19 9:15 AM; Average background @ 10/14/19 9:15 AM; Ar38 bk val,er = @ 10/14/19 9:15 AM; Average background @ 10/14/19 9:15 AM; Ar37 bk val,er = @ 10/14/19 9:15 AM; Average background @ 10/14/19 9:15 AM; Ar36 bk val…	B:24 DS	ALLLLLAAAAAA	1	Pychron Script	1	Fusions CO2	3	0	0	0	0	30	30	129			0	0.0444443	0.0134548	446.206	0.054374	1.63934	0.0178647	0.0692705	0.0124331	-0.0215433	0.0140452	0.0073541	0.0005609	0.0745687	0.0098268	447.777	0.0533436	1.672	0.0174083	0.0791408
67058-48	K17-133.5	37	2019-10-08	17.5667	3653401000	Heizler, M	DetritalSanidine	24	Heizler01192		localhost	7.875	Ar41 bk val,er = @ 10/14/19 9:15 AM; Average background @ 10/14/19 9:15 AM; Ar40 bk val,er = @ 10/14/19 9:15 AM; Line-segment interpolation @ 10/14/19 9:15 AM; Ar39 bk val,er = @ 10/14/19 9:15 AM; Average background @ 10/14/19 9:15 AM; Ar38 bk val,er = @ 10/14/19 9:15 AM; Average background @ 10/14/19 9:15 AM; Ar37 bk val,er = @ 10/14/19 9:15 AM; Average background @ 10/14/19 9:15 AM; Ar36 bk val…	B:24 DS	ALLLLLAAAAAA	1	Pychron Script	1	Fusions CO2	3	0	0	0	0	30	30	130			0	0.049612	0.0111207	389.498	0.0636094	8.00744	0.0242853	0.10986	0.0114788	0.0304675	0.0179571	0.0064597	0.0006193	0.0797364	0.0062614	391.051	0.0627995	8.04011	0.0239515	0.119731
67058-49	K17-133.5	37	2019-10-08	18.0333	3653403000	Heizler, M	DetritalSanidine	24	Heizler01192		localhost	7.875	Ar41 bk val,er = @ 10/14/19 9:15 AM; Average background @ 10/14/19 9:15 AM; Ar40 bk val,er = @ 10/14/19 9:15 AM; Line-segment interpolation @ 10/14/19 9:15 AM; Ar39 bk val,er = @ 10/14/19 9:15 AM; Average background @ 10/14/19 9:15 AM; Ar38 bk val,er = @ 10/14/19 9:15 AM; Average background @ 10/14/19 9:15 AM; Ar37 bk val,er = @ 10/14/19 9:15 AM; Average background @ 10/14/19 9:15 AM; Ar36 bk val…	B:24 DS	ALLLLLAAAAAA	1	Pychron Script	1	Fusions CO2	3	0	0	0	0	30	30	131			0	0.033748	0.0097102	190.139	0.0290245	22.4645	0.0178296	0.263035	0.0071074	0.139216	0.0108149	0.0040179	0.0003716	0.0638724	0.0031341	191.603	0.0277835	22.4971	0.0173723	0.272906
67058-50	K17-133.5	37	2019-10-08	18.1333	3653403000	Heizler, M	DetritalSanidine	24	Heizler01192		localhost	7.875	Ar41 bk val,er = @ 10/14/19 9:15 AM; Average background @ 10/14/19 9:15 AM; Ar40 bk val,er = @ 10/14/19 9:15 AM; Line-segment interpolation @ 10/14/19 9:15 AM; Ar39 bk val,er = @ 10/14/19 9:15 AM; Average background @ 10/14/19 9:15 AM; Ar38 bk val,er = @ 10/14/19 9:15 AM; Average background @ 10/14/19 9:15 AM; Ar37 bk val,er = @ 10/14/19 9:15 AM; Average background @ 10/14/19 9:15 AM; Ar36 bk val…	B:24 DS	ALLLLLAAAAAA	1	Pychron Script	1	Fusions CO2	3	0	0	0	0	30	30	132			0	0.0602639	0.0113013	735.022	0.0682482	13.9521	0.0258086	0.206058	0.0111742	0.062383	0.0189657	0.0098661	0.000758	0.0903883	0.0065768	736.469	0.0677614	13.9848	0.0254948	0.215928
67058-51	K17-133.5	37	2019-10-08	18.2333	3653403000	Heizler, M	DetritalSanidine	24	Heizler01192		localhost	7.875	Ar41 bk val,er = @ 10/14/19 9:15 AM; Average background @ 10/14/19 9:15 AM; Ar40 bk val,er = @ 10/14/19 9:15 AM; Line-segment interpolation @ 10/14/19 9:15 AM; Ar39 bk val,er = @ 10/14/19 9:15 AM; Average background @ 10/14/19 9:15 AM; Ar38 bk val,er = @ 10/14/19 9:15 AM; Average background @ 10/14/19 9:15 AM; Ar37 bk val,er = @ 10/14/19 9:15 AM; Average background @ 10/14/19 9:15 AM; Ar36 bk val…	B:24 DS	ALLLLLAAAAAA	1	Pychron Script	1	Fusions CO2	3	0	0	0	0	30	30	133			0	0.0458427	0.01417	362.597	0.0529219	1.14811	0.0183199	0.0441019	0.0099449	0.0176722	0.0163957	-0.0022475	0.0003478	0.0759671	0.0107854	364.026	0.0523247	1.18078	0.0178752	0.0539722
67058-52	K17-133.5	37	2019-10-08	18.3	3653404000	Heizler, M	DetritalSanidine	24	Heizler01192		localhost	7.875	Ar41 bk val,er = @ 10/14/19 9:15 AM; Average background @ 10/14/19 9:15 AM; Ar40 bk val,er = @ 10/14/19 9:15 AM; Line-segment interpolation @ 10/14/19 9:15 AM; Ar39 bk val,er = @ 10/14/19 9:15 AM; Average background @ 10/14/19 9:15 AM; Ar38 bk val,er = @ 10/14/19 9:15 AM; Average background @ 10/14/19 9:15 AM; Ar37 bk val,er = @ 10/14/19 9:15 AM; Average background @ 10/14/19 9:15 AM; Ar36 bk val…	B:24 DS	ALLLLLAAAAAA	1	Pychron Script	1	Fusions CO2	3	0	0	0	0	30	30	134			0	0.244034	0.0296415	2978	0.797842	52.7594	0.168802	0.831163	0.0438703	0.13735	0.0843691	0.0860785	0.0059742	0.274159	0.0281807	2979.41	0.797804	52.792	0.168754	0.841033
67058-53	K17-133.5	37	2019-10-08	18.4167	3653404000	Heizler, M	DetritalSanidine	24	Heizler01192		localhost	7.875	Ar41 bk val,er = @ 10/14/19 9:15 AM; Average background @ 10/14/19 9:15 AM; Ar40 bk val,er = @ 10/14/19 9:15 AM; Line-segment interpolation @ 10/14/19 9:15 AM; Ar39 bk val,er = @ 10/14/19 9:15 AM; Average background @ 10/14/19 9:15 AM; Ar38 bk val,er = @ 10/14/19 9:15 AM; Average background @ 10/14/19 9:15 AM; Ar37 bk val,er = @ 10/14/19 9:15 AM; Average background @ 10/14/19 9:15 AM; Ar36 bk val…	B:24 DS	ALLLLLAAAAAA	1	Pychron Script	1	Fusions CO2	3	0	0	0	0	30	30	135			0	0.0480733	0.0098568	266.652	0.0306503	32.8672	0.0170572	0.410943	0.0066897	0.168692	0.0109559	0.0395618	0.0005845	0.0781977	0.0035623	268.046	0.0296899	32.8998	0.0165785	0.420813
67058-54	K17-133.5	37	2019-10-08	18.5333	3653404000	Heizler, M	DetritalSanidine	24	Heizler01192		localhost	7.875	Ar41 bk val,er = @ 10/14/19 9:15 AM; Average background @ 10/14/19 9:15 AM; Ar40 bk val,er = @ 10/14/19 9:15 AM; Line-segment interpolation @ 10/14/19 9:15 AM; Ar39 bk val,er = @ 10/14/19 9:15 AM; Average background @ 10/14/19 9:15 AM; Ar38 bk val,er = @ 10/14/19 9:15 AM; Average background @ 10/14/19 9:15 AM; Ar37 bk val,er = @ 10/14/19 9:15 AM; Average background @ 10/14/19 9:15 AM; Ar36 bk val…	B:24 DS	ALLLLLAAAAAA	1	Pychron Script	1	Fusions CO2	3	0	0	0	0	30	30	136			0	0.041904	0.0097898	478.527	0.0441617	48.0954	0.0199098	0.594994	0.006486	0.19026	0.0128419	0.0545883	0.0006619	0.0720284	0.0033727	479.899	0.0435193	48.128	0.0195013	0.604864
67058-55	K17-133.5	37	2019-10-08	18.6333	3653405000	Heizler, M	DetritalSanidine	24	Heizler01192		localhost	7.875	Ar41 bk val,er = @ 10/14/19 9:15 AM; Average background @ 10/14/19 9:15 AM; Ar40 bk val,er = @ 10/14/19 9:15 AM; Line-segment interpolation @ 10/14/19 9:15 AM; Ar39 bk val,er = @ 10/14/19 9:15 AM; Average background @ 10/14/19 9:15 AM; Ar38 bk val,er = @ 10/14/19 9:15 AM; Average background @ 10/14/19 9:15 AM; Ar37 bk val,er = @ 10/14/19 9:15 AM; Average background @ 10/14/19 9:15 AM; Ar36 bk val…	B:24 DS	ALLLLLAAAAAA	1	Pychron Script	1	Fusions CO2	3	0	0	0	0	30	30	137			0	0.0647185	0.0116175	797.16	0.0738452	16.1328	0.0331895	0.221967	0.0142267	0.125464	0.0164365	0.0445446	0.0011922	0.0948429	0.0071063	798.513	0.0734666	16.1654	0.032946	0.231837
67058-56	K17-133.5	37	2019-10-08	18.7333	3653405000	Heizler, M	DetritalSanidine	24	Heizler01192		localhost	7.875	Ar41 bk val,er = @ 10/14/19 9:15 AM; Average background @ 10/14/19 9:15 AM; Ar40 bk val,er = @ 10/14/19 9:15 AM; Line-segment interpolation @ 10/14/19 9:15 AM; Ar39 bk val,er = @ 10/14/19 9:15 AM; Average background @ 10/14/19 9:15 AM; Ar38 bk val,er = @ 10/14/19 9:15 AM; Average background @ 10/14/19 9:15 AM; Ar37 bk val,er = @ 10/14/19 9:15 AM; Average background @ 10/14/19 9:15 AM; Ar36 bk val…	B:24 DS	ALLLLLAAAAAA	1	Pychron Script	1	Fusions CO2	3	0	0	0	0	30	30	138			0	0.148926	0.0247306	2702.68	0.579628	5.0668	0.0683283	0.166164	0.0263458	0.0246622	0.0763843	0.0103265	0.0015746	0.179051	0.0229595	2704.02	0.579579	5.09947	0.0682104	0.176035
67058-57	K17-133.5	37	2019-10-08	18.8167	3653405000	Heizler, M	DetritalSanidine	24	Heizler01192		localhost	7.875	Ar41 bk val,er = @ 10/14/19 9:15 AM; Average background @ 10/14/19 9:15 AM; Ar40 bk val,er = @ 10/14/19 9:15 AM; Line-segment interpolation @ 10/14/19 9:15 AM; Ar39 bk val,er = @ 10/14/19 9:15 AM; Average background @ 10/14/19 9:15 AM; Ar38 bk val,er = @ 10/14/19 9:15 AM; Average background @ 10/14/19 9:15 AM; Ar37 bk val,er = @ 10/14/19 9:15 AM; Average background @ 10/14/19 9:15 AM; Ar36 bk val…	B:24 DS	ALLLLLAAAAAA	1	Pychron Script	1	Fusions CO2	3	0	0	0	0	30	30	139			0	0.0985725	0.0159357	1865.93	0.360961	7.72441	0.0423752	0.153733	0.0241543	0.0775839	0.0308685	0.0159976	0.0011423	0.128697	0.0130185	1867.25	0.360882	7.75708	0.0421848	0.163603
67058-58	K17-133.5	37	2019-10-08	18.9333	3653406000	Heizler, M	DetritalSanidine	24	Heizler01192		localhost	7.875	Ar41 bk val,er = @ 10/14/19 9:15 AM; Average background @ 10/14/19 9:15 AM; Ar40 bk val,er = @ 10/14/19 9:15 AM; Line-segment interpolation @ 10/14/19 9:15 AM; Ar39 bk val,er = @ 10/14/19 9:15 AM; Average background @ 10/14/19 9:15 AM; Ar38 bk val,er = @ 10/14/19 9:15 AM; Average background @ 10/14/19 9:15 AM; Ar37 bk val,er = @ 10/14/19 9:15 AM; Average background @ 10/14/19 9:15 AM; Ar36 bk val…	B:24 DS	ALLLLLAAAAAA	1	Pychron Script	1	Fusions CO2	3	0	0	0	0	30	30	140			0	0.0644163	0.0116794	847.335	0.0914481	16.524	0.0332438	0.237873	0.0113927	0.0795135	0.017642	0.0548743	0.0014129	0.0945407	0.0072071	848.636	0.0911278	16.5567	0.0330008	0.247743
67058-59	K17-133.5	37	2019-10-08	19.15	3653407000	Heizler, M	DetritalSanidine	24	Heizler01192		localhost	7.875	Ar41 bk val,er = @ 10/14/19 9:15 AM; Average background @ 10/14/19 9:15 AM; Ar40 bk val,er = @ 10/14/19 9:15 AM; Line-segment interpolation @ 10/14/19 9:15 AM; Ar39 bk val,er = @ 10/14/19 9:15 AM; Average background @ 10/14/19 9:15 AM; Ar38 bk val,er = @ 10/14/19 9:15 AM; Average background @ 10/14/19 9:15 AM; Ar37 bk val,er = @ 10/14/19 9:15 AM; Average background @ 10/14/19 9:15 AM; Ar36 bk val…	B:24 DS	ALLLLLAAAAAA	1	Pychron Script	1	Fusions CO2	3	0	0	0	0	30	30	141			0	0.0697407	0.010647	934.653	0.085323	14.187	0.0302664	0.209452	0.0118739	0.0313243	0.018774	0.0145636	0.0008485	0.0998651	0.0053752	935.911	0.0849393	14.2197	0.0299993	0.219322
67058-60	K17-133.5	37	2019-10-08	19.2667	3653407000	Heizler, M	DetritalSanidine	24	Heizler01192		localhost	7.875	Ar41 bk val,er = @ 10/14/19 9:15 AM; Average background @ 10/14/19 9:15 AM; Ar40 bk val,er = @ 10/14/19 9:15 AM; Line-segment interpolation @ 10/14/19 9:15 AM; Ar39 bk val,er = @ 10/14/19 9:15 AM; Average background @ 10/14/19 9:15 AM; Ar38 bk val,er = @ 10/14/19 9:15 AM; Average background @ 10/14/19 9:15 AM; Ar37 bk val,er = @ 10/14/19 9:15 AM; Average background @ 10/14/19 9:15 AM; Ar36 bk val…	B:24 DS	ALLLLLAAAAAA	1	Pychron Script	1	Fusions CO2	3	0	0	0	0	30	30	142			0	0.0350625	0.0097156	21.0939	0.0159207	2.08062	0.0128366	0.0338981	0.0061353	0.0319816	0.0112916	0.0233672	0.0004771	0.0651869	0.0031507	22.3308	0.0135341	2.11329	0.0121935	0.0437684
67058-61	K17-133.5	37	2019-10-08	19.3833	3653407000	Heizler, M	DetritalSanidine	24	Heizler01192		localhost	7.875	Ar41 bk val,er = @ 10/14/19 9:15 AM; Average background @ 10/14/19 9:15 AM; Ar40 bk val,er = @ 10/14/19 9:15 AM; Line-segment interpolation @ 10/14/19 9:15 AM; Ar39 bk val,er = @ 10/14/19 9:15 AM; Average background @ 10/14/19 9:15 AM; Ar38 bk val,er = @ 10/14/19 9:15 AM; Average background @ 10/14/19 9:15 AM; Ar37 bk val,er = @ 10/14/19 9:15 AM; Average background @ 10/14/19 9:15 AM; Ar36 bk val…	B:24 DS	ALLLLLAAAAAA	1	Pychron Script	1	Fusions CO2	3	0	0	0	0	30	30	143			0	0.0363205	0.0096724	321.192	0.0334866	33.8981	0.0166398	0.414045	0.0062987	0.121571	0.0101181	0.0157606	0.0004349	0.0664449	0.003015	322.407	0.0323279	33.9308	0.0161489	0.423916
67058-63	K17-133.5	37	2019-10-08	19.6167	3653408000	Heizler, M	DetritalSanidine	24	Heizler01192		localhost	7.875	Ar41 bk val,er = @ 10/14/19 9:15 AM; Average background @ 10/14/19 9:15 AM; Ar40 bk val,er = @ 10/14/19 9:15 AM; Line-segment interpolation @ 10/14/19 9:15 AM; Ar39 bk val,er = @ 10/14/19 9:15 AM; Average background @ 10/14/19 9:15 AM; Ar38 bk val,er = @ 10/14/19 9:15 AM; Average background @ 10/14/19 9:15 AM; Ar37 bk val,er = @ 10/14/19 9:15 AM; Average background @ 10/14/19 9:15 AM; Ar36 bk val…	B:24 DS	ALLLLLAAAAAA	1	Pychron Script	1	Fusions CO2	3	0	0	0	0	30	30	145			0	0.0322602	0.0097294	222.679	0.0282928	24.3728	0.0160664	0.305701	0.0059329	0.0913335	0.0105995	0.0443441	0.0006082	0.0623846	0.0031929	223.852	0.0266286	24.4054	0.0155573	0.315572
67058-64	K17-133.5	37	2019-10-16	14.4833	3654081000	Heizler, M	DetritalSanidine	24	Heizler01192		localhost	7.875	Ar41 = A, deleting t<30 @ 10/17/19 8:30 AM; Ar40 = L @ 10/17/19 8:30 AM; Ar39 = L @ 10/17/19 8:30 AM; Ar38 = L @ 10/17/19 8:30 AM; Ar37 = L @ 10/17/19 8:30 AM; Ar36 = L @ 10/17/19 8:30 AM; Ar41 bk val,er = @ 10/17/19 8:35 AM; Average background @ 10/17/19 8:35 AM; Ar40 bk val,er = @ 10/17/19 8:35 AM; Line-segment interpolation @ 10/17/19 8:35 AM; Ar39 bk val,er = @ 10/17/19 8:35 AM; Average backg…	B:24 DS	ALLLLLAAAAAA	1	Pychron Script	1	Fusions CO2	3	0	0	0	0	30	30	154			0	0.0249613	0.0082305	987.303	0.0823167	1.76947	0.0210336	0.0644402	0.011775	-0.0004465	0.0157707	0.000322	0.0003441	0.0471239	0.0035938	987.958	0.08188	1.80404	0.0204615	0.0702763
67058-65	K17-133.5	37	2019-10-16	14.5667	3654081000	Heizler, M	DetritalSanidine	24	Heizler01192		localhost	7.875	Ar41 = A, deleting t<30 @ 10/17/19 8:30 AM; Ar40 = L @ 10/17/19 8:30 AM; Ar39 = L @ 10/17/19 8:30 AM; Ar38 = L @ 10/17/19 8:30 AM; Ar37 = L @ 10/17/19 8:30 AM; Ar36 = L @ 10/17/19 8:30 AM; Ar41 bk val,er = @ 10/17/19 8:35 AM; Average background @ 10/17/19 8:35 AM; Ar40 bk val,er = @ 10/17/19 8:35 AM; Line-segment interpolation @ 10/17/19 8:35 AM; Ar39 bk val,er = @ 10/17/19 8:35 AM; Average backg…	B:24 DS	ALLLLLAAAAAA	1	Pychron Script	1	Fusions CO2	3	0	0	0	0	30	30	155			0	0.0184134	0.0079121	371.182	0.0480746	0.825398	0.0195338	0.043689	0.0099984	0.0044655	0.0156439	-0.0011305	0.0002923	0.040576	0.0027883	371.847	0.0472597	0.859968	0.0189163	0.0495251
67058-66	K17-133.5	37	2019-10-16	14.65	3654082000	Heizler, M	DetritalSanidine	24	Heizler01192		localhost	7.875	Ar41 = A, deleting t<30 @ 10/17/19 8:30 AM; Ar40 = L @ 10/17/19 8:30 AM; Ar39 = L @ 10/17/19 8:30 AM; Ar38 = L @ 10/17/19 8:30 AM; Ar37 = L @ 10/17/19 8:30 AM; Ar36 = L @ 10/17/19 8:30 AM; Ar41 bk val,er = @ 10/17/19 8:35 AM; Average background @ 10/17/19 8:35 AM; Ar40 bk val,er = @ 10/17/19 8:35 AM; Line-segment interpolation @ 10/17/19 8:35 AM; Ar39 bk val,er = @ 10/17/19 8:35 AM; Average backg…	B:24 DS	ALLLLLAAAAAA	1	Pychron Script	1	Fusions CO2	3	0	0	0	0	30	30	156			0	0.0906607	0.0094637	1900.14	0.373841	28.7339	0.0860038	0.396414	0.0246168	0.071983	0.0475449	0.0190587	0.0020902	0.112823	0.0058937	1900.82	0.373729	28.7685	0.0858656	0.40225
67058-67	K17-133.5	37	2019-10-16	14.7667	3654082000	Heizler, M	DetritalSanidine	24	Heizler01192		localhost	7.875	Ar41 = A, deleting t<30 @ 10/17/19 8:30 AM; Ar40 = L @ 10/17/19 8:30 AM; Ar39 = L @ 10/17/19 8:30 AM; Ar38 = L @ 10/17/19 8:30 AM; Ar37 = L @ 10/17/19 8:30 AM; Ar36 = L @ 10/17/19 8:30 AM; Ar41 bk val,er = @ 10/17/19 8:35 AM; Average background @ 10/17/19 8:35 AM; Ar40 bk val,er = @ 10/17/19 8:35 AM; Line-segment interpolation @ 10/17/19 8:35 AM; Ar39 bk val,er = @ 10/17/19 8:35 AM; Average backg…	B:24 DS	ALLLLLAAAAAA	1	Pychron Script	1	Fusions CO2	3	0	0	0	0	30	30	157			0	0.0258528	0.0078339	227.327	0.0335814	22.5663	0.0159724	0.293789	0.0066507	0.083248	0.0114194	0.0204179	0.0004906	0.0480154	0.0025582	228.015	0.0321187	22.6009	0.015211	0.299625
67058-68	K17-133.5	37	2019-10-16	15	3654083000	Heizler, M	DetritalSanidine	24	Heizler01192		localhost	7.875	Ar41 = A, deleting t<30 @ 10/17/19 8:30 AM; Ar40 = L @ 10/17/19 8:30 AM; Ar39 = L @ 10/17/19 8:30 AM; Ar38 = L @ 10/17/19 8:30 AM; Ar37 = L @ 10/17/19 8:30 AM; Ar36 = L @ 10/17/19 8:30 AM; Ar41 bk val,er = @ 10/17/19 8:35 AM; Average background @ 10/17/19 8:35 AM; Ar40 bk val,er = @ 10/17/19 8:35 AM; Line-segment interpolation @ 10/17/19 8:35 AM; Ar39 bk val,er = @ 10/17/19 8:35 AM; Average backg…	B:24 DS	ALLLLLAAAAAA	1	Pychron Script	1	Fusions CO2	3	0	0	0	0	30	30	158			0	0.0506771	0.0086332	588.903	0.102756	27.1034	0.0241234	0.381959	0.0109379	0.0875504	0.0189292	0.026311	0.0008172	0.0728397	0.0044392	589.614	0.102235	27.138	0.0236262	0.387795
67058-69	K17-133.5	37	2019-10-16	15.2333	3654084000	Heizler, M	DetritalSanidine	24	Heizler01192		localhost	7.875	Ar41 = A, deleting t<30 @ 10/17/19 8:30 AM; Ar40 = L @ 10/17/19 8:30 AM; Ar39 = L @ 10/17/19 8:30 AM; Ar38 = L @ 10/17/19 8:30 AM; Ar37 = L @ 10/17/19 8:30 AM; Ar36 = L @ 10/17/19 8:30 AM; Ar41 bk val,er = @ 10/17/19 8:35 AM; Average background @ 10/17/19 8:35 AM; Ar40 bk val,er = @ 10/17/19 8:35 AM; Line-segment interpolation @ 10/17/19 8:35 AM; Ar39 bk val,er = @ 10/17/19 8:35 AM; Average backg…	B:24 DS	ALLLLLAAAAAA	1	Pychron Script	1	Fusions CO2	3	0	0	0	0	30	30	159			0	0.0443563	0.0077705	501.697	0.0451269	46.8475	0.0205208	0.613016	0.0066419	0.264846	0.0128716	0.132624	0.0011617	0.0665189	0.0023567	502.422	0.0441973	46.882	0.0199339	0.618852
67058-70	K17-133.5	37	2019-10-16	15.3167	3654084000	Heizler, M	DetritalSanidine	24	Heizler01192		localhost	7.875	Ar41 = A, deleting t<30 @ 10/17/19 8:30 AM; Ar40 = L @ 10/17/19 8:30 AM; Ar39 = L @ 10/17/19 8:30 AM; Ar38 = L @ 10/17/19 8:30 AM; Ar37 = L @ 10/17/19 8:30 AM; Ar36 = L @ 10/17/19 8:30 AM; Ar41 bk val,er = @ 10/17/19 8:35 AM; Average background @ 10/17/19 8:35 AM; Ar40 bk val,er = @ 10/17/19 8:35 AM; Line-segment interpolation @ 10/17/19 8:35 AM; Ar39 bk val,er = @ 10/17/19 8:35 AM; Average backg…	B:24 DS	ALLLLLAAAAAA	1	Pychron Script	1	Fusions CO2	3	0	0	0	0	30	30	160			0	0.0554928	0.0087931	625.288	0.105526	25.917	0.0337061	0.35226	0.0131788	0.0799782	0.0176411	0.0156899	0.0007554	0.0776554	0.0047427	626.018	0.105165	25.9516	0.0333521	0.358096
67058-71	K17-133.5	37	2019-10-16	15.4167	3654084000	Heizler, M	DetritalSanidine	24	Heizler01192		localhost	7.875	Ar41 = A, deleting t<30 @ 10/17/19 8:30 AM; Ar40 = L @ 10/17/19 8:30 AM; Ar39 = L @ 10/17/19 8:30 AM; Ar38 = L @ 10/17/19 8:30 AM; Ar37 = L @ 10/17/19 8:30 AM; Ar36 = L @ 10/17/19 8:30 AM; Ar41 bk val,er = @ 10/17/19 8:35 AM; Average background @ 10/17/19 8:35 AM; Ar40 bk val,er = @ 10/17/19 8:35 AM; Line-segment interpolation @ 10/17/19 8:35 AM; Ar39 bk val,er = @ 10/17/19 8:35 AM; Average backg…	B:24 DS	ALLLLLAAAAAA	1	Pychron Script	1	Fusions CO2	3	0	0	0	0	30	30	161			0	0.0366802	0.0078754	184.15	0.0249533	22.7836	0.0177826	0.287482	0.0071302	0.0941419	0.0112928	0.0121689	0.0004084	0.0588429	0.0026824	184.886	0.0235236	22.8182	0.017102	0.293318
67058-72	K17-133.5	37	2019-10-16	15.4833	3654085000	Heizler, M	DetritalSanidine	24	Heizler01192		localhost	7.875	Ar41 = A, deleting t<30 @ 10/17/19 8:30 AM; Ar40 = L @ 10/17/19 8:30 AM; Ar39 = L @ 10/17/19 8:30 AM; Ar38 = L @ 10/17/19 8:30 AM; Ar37 = L @ 10/17/19 8:30 AM; Ar36 = L @ 10/17/19 8:30 AM; Ar41 bk val,er = @ 10/17/19 8:35 AM; Average background @ 10/17/19 8:35 AM; Ar40 bk val,er = @ 10/17/19 8:35 AM; Line-segment interpolation @ 10/17/19 8:35 AM; Ar39 bk val,er = @ 10/17/19 8:35 AM; Average backg…	B:24 DS	ALLLLLAAAAAA	1	Pychron Script	1	Fusions CO2	3	0	0	0	0	30	30	162			0	0.124595	0.0118339	2511.32	0.599619	36.3745	0.138285	0.645705	0.0483272	0.099401	0.0513105	0.0619262	0.0052144	0.146758	0.0092312	2512.05	0.599564	36.409	0.138199	0.651541
67058-73	K17-133.5	37	2019-10-16	15.5667	3654085000	Heizler, M	DetritalSanidine	24	Heizler01192		localhost	7.875	Ar41 = A, deleting t<30 @ 10/17/19 8:30 AM; Ar40 = L @ 10/17/19 8:30 AM; Ar39 = L @ 10/17/19 8:30 AM; Ar38 = L @ 10/17/19 8:30 AM; Ar37 = L @ 10/17/19 8:30 AM; Ar36 = L @ 10/17/19 8:30 AM; Ar41 bk val,er = @ 10/17/19 8:35 AM; Average background @ 10/17/19 8:35 AM; Ar40 bk val,er = @ 10/17/19 8:35 AM; Line-segment interpolation @ 10/17/19 8:35 AM; Ar39 bk val,er = @ 10/17/19 8:35 AM; Average backg…	B:24 DS	ALLLLLAAAAAA	1	Pychron Script	1	Fusions CO2	3	0	0	0	0	30	30	163			0	0.0729746	0.0084685	1029.33	0.118551	19.1802	0.0326127	0.283089	0.0146079	0.0656581	0.019751	0.0290167	0.0009109	0.0951372	0.0041096	1030.07	0.118288	19.2148	0.0322467	0.288925
67058-74	K17-133.5	37	2019-10-16	15.6667	3654085000	Heizler, M	DetritalSanidine	24	Heizler01192		localhost	7.875	Ar41 = A, deleting t<30 @ 10/17/19 8:30 AM; Ar40 = L @ 10/17/19 8:30 AM; Ar39 = L @ 10/17/19 8:30 AM; Ar38 = L @ 10/17/19 8:30 AM; Ar37 = L @ 10/17/19 8:30 AM; Ar36 = L @ 10/17/19 8:30 AM; Ar41 bk val,er = @ 10/17/19 8:35 AM; Average background @ 10/17/19 8:35 AM; Ar40 bk val,er = @ 10/17/19 8:35 AM; Line-segment interpolation @ 10/17/19 8:35 AM; Ar39 bk val,er = @ 10/17/19 8:35 AM; Average backg…	B:24 DS	ALLLLLAAAAAA	1	Pychron Script	1	Fusions CO2	3	0	0	0	0	30	30	164			0	0.042603	0.0078161	156.993	0.0267638	18.4369	0.0202523	0.237352	0.0066971	0.127589	0.0120541	0.0064297	0.0003324	0.0647656	0.0025031	157.744	0.0256324	18.4715	0.0196574	0.243188
67058-75	K17-133.5	37	2019-10-16	15.75	3654086000	Heizler, M	DetritalSanidine	24	Heizler01192		localhost	7.875	Ar41 = A, deleting t<30 @ 10/17/19 8:30 AM; Ar40 = L @ 10/17/19 8:30 AM; Ar39 = L @ 10/17/19 8:30 AM; Ar38 = L @ 10/17/19 8:30 AM; Ar37 = L @ 10/17/19 8:30 AM; Ar36 = L @ 10/17/19 8:30 AM; Ar41 bk val,er = @ 10/17/19 8:35 AM; Average background @ 10/17/19 8:35 AM; Ar40 bk val,er = @ 10/17/19 8:35 AM; Line-segment interpolation @ 10/17/19 8:35 AM; Ar39 bk val,er = @ 10/17/19 8:35 AM; Average backg…	B:24 DS	ALLLLLAAAAAA	1	Pychron Script	1	Fusions CO2	3	0	0	0	0	30	30	165			0	0.0436411	0.0084989	142.514	0.0453048	10.2954	0.0246818	0.168419	0.0114295	0.0622565	0.0224139	0.008239	0.0006972	0.0658037	0.004172	143.27	0.0446592	10.33	0.024196	0.174255
67058-77	K17-133.5	37	2019-10-16	15.9167	3654086000	Heizler, M	DetritalSanidine	24	Heizler01192		localhost	7.875	Ar41 = A, deleting t<30 @ 10/17/19 8:30 AM; Ar40 = L @ 10/17/19 8:30 AM; Ar39 = L @ 10/17/19 8:30 AM; Ar38 = L @ 10/17/19 8:30 AM; Ar37 = L @ 10/17/19 8:30 AM; Ar36 = L @ 10/17/19 8:30 AM; Ar41 bk val,er = @ 10/17/19 8:35 AM; Average background @ 10/17/19 8:35 AM; Ar40 bk val,er = @ 10/17/19 8:35 AM; Line-segment interpolation @ 10/17/19 8:35 AM; Ar39 bk val,er = @ 10/17/19 8:35 AM; Average backg…	B:24 DS	ALLLLLAAAAAA	1	Pychron Script	1	Fusions CO2	3	0	0	0	0	30	30	167			0	0.0173364	0.0086113	302.665	0.0475348	0.723449	0.0207841	0.0526263	0.0121611	0.022071	0.0147965	-5.75e-05	0.0003829	0.039499	0.0043964	303.432	0.046911	0.758019	0.0202048	0.0584624
67058-78	K17-133.5	37	2019-10-16	16.0333	3654087000	Heizler, M	DetritalSanidine	24	Heizler01192		localhost	7.875	Ar41 = A, deleting t<30 @ 10/17/19 8:30 AM; Ar40 = L @ 10/17/19 8:30 AM; Ar39 = L @ 10/17/19 8:30 AM; Ar38 = L @ 10/17/19 8:30 AM; Ar37 = L @ 10/17/19 8:30 AM; Ar36 = L @ 10/17/19 8:30 AM; Ar41 bk val,er = @ 10/17/19 8:35 AM; Average background @ 10/17/19 8:35 AM; Ar40 bk val,er = @ 10/17/19 8:35 AM; Line-segment interpolation @ 10/17/19 8:35 AM; Ar39 bk val,er = @ 10/17/19 8:35 AM; Average backg…	B:24 DS	ALLLLLAAAAAA	1	Pychron Script	1	Fusions CO2	3	0	0	0	0	30	30	168			0	0.0364673	0.0078956	323.989	0.0338414	31.7756	0.0178604	0.404446	0.0068444	0.0658604	0.0124079	0.0176351	0.0004943	0.0586299	0.0027413	324.762	0.0329194	31.8102	0.0171829	0.410282
67058-79	K17-133.5	37	2019-10-16	16.3	3654088000	Heizler, M	DetritalSanidine	24	Heizler01192		localhost	7.875	Ar41 = A, deleting t<30 @ 10/17/19 8:30 AM; Ar40 = L @ 10/17/19 8:30 AM; Ar39 = L @ 10/17/19 8:30 AM; Ar38 = L @ 10/17/19 8:30 AM; Ar37 = L @ 10/17/19 8:30 AM; Ar36 = L @ 10/17/19 8:30 AM; Ar41 bk val,er = @ 10/17/19 8:35 AM; Average background @ 10/17/19 8:35 AM; Ar40 bk val,er = @ 10/17/19 8:35 AM; Line-segment interpolation @ 10/17/19 8:35 AM; Ar39 bk val,er = @ 10/17/19 8:35 AM; Average backg…	B:24 DS	ALLLLLAAAAAA	1	Pychron Script	1	Fusions CO2	3	0	0	0	0	30	30	169			0	0.0311131	0.0078055	427.795	0.0420112	71.8293	0.0247411	0.885251	0.0060491	0.188695	0.0116303	0.0234477	0.0004962	0.0532757	0.0024699	428.584	0.0410903	71.8638	0.0242565	0.891087
67058-81	K17-133.5	37	2019-10-16	16.5167	3654088000	Heizler, M	DetritalSanidine	24	Heizler01192		localhost	7.875	Ar41 = A, deleting t<30 @ 10/17/19 8:30 AM; Ar40 = L @ 10/17/19 8:30 AM; Ar39 = L @ 10/17/19 8:30 AM; Ar38 = L @ 10/17/19 8:30 AM; Ar37 = L @ 10/17/19 8:30 AM; Ar36 = L @ 10/17/19 8:30 AM; Ar41 bk val,er = @ 10/17/19 8:35 AM; Average background @ 10/17/19 8:35 AM; Ar40 bk val,er = @ 10/17/19 8:35 AM; Line-segment interpolation @ 10/17/19 8:35 AM; Ar39 bk val,er = @ 10/17/19 8:35 AM; Average backg…	B:24 DS	ALLLLLAAAAAA	1	Pychron Script	1	Fusions CO2	3	0	0	0	0	30	30	171			0	0.0558103	0.0088445	528.442	0.0744462	37.0851	0.0343472	0.478759	0.0108072	0.203153	0.0191719	0.0144086	0.0006984	0.0779729	0.0048373	529.244	0.0737957	37.1197	0.0339998	0.484595
67058-82	K17-133.5	37	2019-10-16	16.7333	3654089000	Heizler, M	DetritalSanidine	24	Heizler01192		localhost	7.875	Ar41 = A, deleting t<30 @ 10/17/19 8:30 AM; Ar40 = L @ 10/17/19 8:30 AM; Ar39 = L @ 10/17/19 8:30 AM; Ar38 = L @ 10/17/19 8:30 AM; Ar37 = L @ 10/17/19 8:30 AM; Ar36 = L @ 10/17/19 8:30 AM; Ar41 bk val,er = @ 10/17/19 8:35 AM; Average background @ 10/17/19 8:35 AM; Ar40 bk val,er = @ 10/17/19 8:35 AM; Line-segment interpolation @ 10/17/19 8:35 AM; Ar39 bk val,er = @ 10/17/19 8:35 AM; Average backg…	B:24 DS	ALLLLLAAAAAA	1	Pychron Script	1	Fusions CO2	3	0	0	0	0	30	30	172			0	0.0977671	0.0103054	1904.71	0.348456	34.0528	0.0960784	0.612897	0.0426046	0.140882	0.0477754	0.0373896	0.0027911	0.11993	0.0071676	1905.51	0.348303	34.0874	0.0959547	0.618733
67058-83	K17-133.5	37	2019-10-16	16.8333	3654089000	Heizler, M	DetritalSanidine	24	Heizler01192		localhost	7.875	Ar41 = A, deleting t<30 @ 10/17/19 8:30 AM; Ar40 = L @ 10/17/19 8:30 AM; Ar39 = L @ 10/17/19 8:30 AM; Ar38 = L @ 10/17/19 8:30 AM; Ar37 = L @ 10/17/19 8:30 AM; Ar36 = L @ 10/17/19 8:30 AM; Ar41 bk val,er = @ 10/17/19 8:35 AM; Average background @ 10/17/19 8:35 AM; Ar40 bk val,er = @ 10/17/19 8:35 AM; Line-segment interpolation @ 10/17/19 8:35 AM; Ar39 bk val,er = @ 10/17/19 8:35 AM; Average backg…	B:24 DS	ALLLLLAAAAAA	1	Pychron Script	1	Fusions CO2	3	0	0	0	0	30	30	173			0	0.0705938	0.0084692	1039.48	0.116211	15.4557	0.0306092	0.205834	0.0117526	0.0701836	0.0186565	0.0136205	0.0007441	0.0927564	0.0041112	1040.28	0.115791	15.4902	0.0302188	0.21167
67058-84	K17-133.5	37	2019-10-16	17.0333	3654090000	Heizler, M	DetritalSanidine	24	Heizler01192		localhost	7.875	Ar41 = A, deleting t<30 @ 10/17/19 8:30 AM; Ar40 = L @ 10/17/19 8:30 AM; Ar39 = L @ 10/17/19 8:30 AM; Ar38 = L @ 10/17/19 8:30 AM; Ar37 = L @ 10/17/19 8:30 AM; Ar36 = L @ 10/17/19 8:30 AM; Ar41 bk val,er = @ 10/17/19 8:35 AM; Average background @ 10/17/19 8:35 AM; Ar40 bk val,er = @ 10/17/19 8:35 AM; Line-segment interpolation @ 10/17/19 8:35 AM; Ar39 bk val,er = @ 10/17/19 8:35 AM; Average backg…	B:24 DS	ALLLLLAAAAAA	1	Pychron Script	1	Fusions CO2	3	0	0	0	0	30	30	174			0	0.0283568	0.0080303	309.818	0.048973	0.979881	0.0211743	0.0525413	0.0094009	0.0381038	0.0149812	0.0021937	0.0004317	0.0505194	0.0031079	310.601	0.0481453	1.01445	0.020606	0.0583775
67058-85	K17-133.5	37	2019-10-16	17.1333	3654091000	Heizler, M	DetritalSanidine	24	Heizler01192		localhost	7.875	Ar41 = A, deleting t<30 @ 10/17/19 8:30 AM; Ar40 = L @ 10/17/19 8:30 AM; Ar39 = L @ 10/17/19 8:30 AM; Ar38 = L @ 10/17/19 8:30 AM; Ar37 = L @ 10/17/19 8:30 AM; Ar36 = L @ 10/17/19 8:30 AM; Ar41 bk val,er = @ 10/17/19 8:35 AM; Average background @ 10/17/19 8:35 AM; Ar40 bk val,er = @ 10/17/19 8:35 AM; Line-segment interpolation @ 10/17/19 8:35 AM; Ar39 bk val,er = @ 10/17/19 8:35 AM; Average backg…	B:24 DS	ALLLLLAAAAAA	1	Pychron Script	1	Fusions CO2	3	0	0	0	0	30	30	176			0	0.0278519	0.0079355	103.357	0.021002	11.8228	0.0173005	0.151454	0.0060419	0.120818	0.0103948	0.0149282	0.0004517	0.0500145	0.0028541	104.131	0.0191703	11.8574	0.0166001	0.157291
67058-86	K17-133.5	37	2019-10-16	17.2167	3654091000	Heizler, M	DetritalSanidine	24	Heizler01192		localhost	7.875	Ar41 = A, deleting t<30 @ 10/17/19 8:30 AM; Ar40 = L @ 10/17/19 8:30 AM; Ar39 = L @ 10/17/19 8:30 AM; Ar38 = L @ 10/17/19 8:30 AM; Ar37 = L @ 10/17/19 8:30 AM; Ar36 = L @ 10/17/19 8:30 AM; Ar41 bk val,er = @ 10/17/19 8:35 AM; Average background @ 10/17/19 8:35 AM; Ar40 bk val,er = @ 10/17/19 8:35 AM; Line-segment interpolation @ 10/17/19 8:35 AM; Ar39 bk val,er = @ 10/17/19 8:35 AM; Average backg…	B:24 DS	ALLLLLAAAAAA	1	Pychron Script	1	Fusions CO2	3	0	0	0	0	30	30	177			0	0.106394	0.0105911	1710.12	0.41129	31.6638	0.0798136	0.488638	0.0296329	0.146417	0.0473656	0.0406916	0.003046	0.128557	0.0075727	1710.89	0.411205	31.6983	0.0796647	0.494474
67058-87	K17-133.5	37	2019-10-16	17.2833	3654091000	Heizler, M	DetritalSanidine	24	Heizler01192		localhost	7.875	Ar41 = A, deleting t<30 @ 10/17/19 8:30 AM; Ar40 = L @ 10/17/19 8:30 AM; Ar39 = L @ 10/17/19 8:30 AM; Ar38 = L @ 10/17/19 8:30 AM; Ar37 = L @ 10/17/19 8:30 AM; Ar36 = L @ 10/17/19 8:30 AM; Ar41 bk val,er = @ 10/17/19 8:35 AM; Average background @ 10/17/19 8:35 AM; Ar40 bk val,er = @ 10/17/19 8:35 AM; Line-segment interpolation @ 10/17/19 8:35 AM; Ar39 bk val,er = @ 10/17/19 8:35 AM; Average backg…	B:24 DS	ALLLLLAAAAAA	1	Pychron Script	1	Fusions CO2	3	0	0	0	0	30	30	178			0	0.107112	0.0199115	3578.17	1.05687	11.2063	0.115388	0.297314	0.0382526	0.090674	0.0885446	0.0324307	0.0029436	0.129274	0.0184836	3578.93	1.05683	11.2409	0.115285	0.30315
67058-88	K17-133.5	37	2019-10-16	17.3833	3654091000	Heizler, M	DetritalSanidine	24	Heizler01192		localhost	7.875	Ar41 = A, deleting t<30 @ 10/17/19 8:30 AM; Ar40 = L @ 10/17/19 8:30 AM; Ar39 = L @ 10/17/19 8:30 AM; Ar38 = L @ 10/17/19 8:30 AM; Ar37 = L @ 10/17/19 8:30 AM; Ar36 = L @ 10/17/19 8:30 AM; Ar41 bk val,er = @ 10/17/19 8:35 AM; Average background @ 10/17/19 8:35 AM; Ar40 bk val,er = @ 10/17/19 8:35 AM; Line-segment interpolation @ 10/17/19 8:35 AM; Ar39 bk val,er = @ 10/17/19 8:35 AM; Average backg…	B:24 DS	ALLLLLAAAAAA	1	Pychron Script	1	Fusions CO2	3	0	0	0	0	30	30	179			0	0.0543102	0.0079009	787.639	0.0622757	81.6157	0.0222948	1.01381	0.0063163	0.17723	0.0134738	0.0344149	0.0006117	0.0764729	0.0027566	788.393	0.061769	81.6502	0.0217558	1.01965
67058-89	K17-133.5	37	2019-10-16	17.4833	3654092000	Heizler, M	DetritalSanidine	24	Heizler01192		localhost	7.875	Ar41 = A, deleting t<30 @ 10/17/19 8:30 AM; Ar40 = L @ 10/17/19 8:30 AM; Ar39 = L @ 10/17/19 8:30 AM; Ar38 = L @ 10/17/19 8:30 AM; Ar37 = L @ 10/17/19 8:30 AM; Ar36 = L @ 10/17/19 8:30 AM; Ar41 bk val,er = @ 10/17/19 8:35 AM; Average background @ 10/17/19 8:35 AM; Ar40 bk val,er = @ 10/17/19 8:35 AM; Line-segment interpolation @ 10/17/19 8:35 AM; Ar39 bk val,er = @ 10/17/19 8:35 AM; Average backg…	B:24 DS	ALLLLLAAAAAA	1	Pychron Script	1	Fusions CO2	3	0	0	0	0	30	30	180			0	0.0354264	0.0078312	191.279	0.0260236	21.6677	0.0174422	0.289632	0.0072525	0.142124	0.0123354	0.018466	0.0005735	0.057589	0.00255	192.024	0.0248319	21.7023	0.0167478	0.295468
67058-90	K17-133.5	37	2019-10-16	17.5833	3654092000	Heizler, M	DetritalSanidine	24	Heizler01192		localhost	7.875	Ar41 = A, deleting t<30 @ 10/17/19 8:30 AM; Ar40 = L @ 10/17/19 8:30 AM; Ar39 = L @ 10/17/19 8:30 AM; Ar38 = L @ 10/17/19 8:30 AM; Ar37 = L @ 10/17/19 8:30 AM; Ar36 = L @ 10/17/19 8:30 AM; Ar41 bk val,er = @ 10/17/19 8:35 AM; Average background @ 10/17/19 8:35 AM; Ar40 bk val,er = @ 10/17/19 8:35 AM; Line-segment interpolation @ 10/17/19 8:35 AM; Ar39 bk val,er = @ 10/17/19 8:35 AM; Average backg…	B:24 DS	ALLLLLAAAAAA	1	Pychron Script	1	Fusions CO2	3	0	0	0	0	30	30	181			0	0.0733694	0.0085419	1164.46	0.120007	11.9487	0.0277922	0.218365	0.013807	0.0669032	0.0223646	0.127066	0.0018741	0.095532	0.0042589	1165.2	0.119758	11.9833	0.0273617	0.224201
67058-91	K17-133.5	37	2019-10-16	18.7333	3654096000	Heizler, M	DetritalSanidine	24	Heizler01192		localhost	7.875	Ar41 = A, deleting t<30 @ 10/17/19 8:30 AM; Ar40 = L @ 10/17/19 8:30 AM; Ar39 = L @ 10/17/19 8:30 AM; Ar38 = L @ 10/17/19 8:30 AM; Ar37 = L @ 10/17/19 8:30 AM; Ar36 = L @ 10/17/19 8:30 AM; Ar41 bk val,er = @ 10/17/19 8:35 AM; Average background @ 10/17/19 8:35 AM; Ar40 bk val,er = @ 10/17/19 8:35 AM; Line-segment interpolation @ 10/17/19 8:35 AM; Ar39 bk val,er = @ 10/17/19 8:35 AM; Average backg…	B:24 DS	ALLLLLAAAAAA	1	Pychron Script	1	Fusions CO2	3	0	0	0	0	30	30	182			0	0.0311016	0.0078355	223.758	0.0303965	27.2852	0.0167839	0.336235	0.0072341	0.0816226	0.0116866	0.0080781	0.0003989	0.0532642	0.0025631	224.422	0.0284468	27.3198	0.016061	0.342071
67058-92	K17-133.5	37	2019-10-16	18.85	3654097000	Heizler, M	DetritalSanidine	24	Heizler01192		localhost	7.875	Ar41 = A, deleting t<30 @ 10/17/19 8:30 AM; Ar40 = L @ 10/17/19 8:30 AM; Ar39 = L @ 10/17/19 8:30 AM; Ar38 = L @ 10/17/19 8:30 AM; Ar37 = L @ 10/17/19 8:30 AM; Ar36 = L @ 10/17/19 8:30 AM; Ar41 bk val,er = @ 10/17/19 8:35 AM; Average background @ 10/17/19 8:35 AM; Ar40 bk val,er = @ 10/17/19 8:35 AM; Line-segment interpolation @ 10/17/19 8:35 AM; Ar39 bk val,er = @ 10/17/19 8:35 AM; Average backg…	B:24 DS	ALLLLLAAAAAA	1	Pychron Script	1	Fusions CO2	3	0	0	0	0	30	30	183			0	0.0236267	0.0076898	182.179	0.0265508	22.7982	0.0171422	0.284102	0.0077113	0.16349	0.012845	0.0075055	0.0003666	0.0457893	0.0020751	182.853	0.0244981	22.8328	0.0164352	0.289938
67058-93	K17-133.5	37	2019-10-16	18.9333	3654097000	Heizler, M	DetritalSanidine	24	Heizler01192		localhost	7.875	Ar41 = A, deleting t<30 @ 10/17/19 8:30 AM; Ar40 = L @ 10/17/19 8:30 AM; Ar39 = L @ 10/17/19 8:30 AM; Ar38 = L @ 10/17/19 8:30 AM; Ar37 = L @ 10/17/19 8:30 AM; Ar36 = L @ 10/17/19 8:30 AM; Ar41 bk val,er = @ 10/17/19 8:35 AM; Average background @ 10/17/19 8:35 AM; Ar40 bk val,er = @ 10/17/19 8:35 AM; Line-segment interpolation @ 10/17/19 8:35 AM; Ar39 bk val,er = @ 10/17/19 8:35 AM; Average backg…	B:24 DS	ALLLLLAAAAAA	1	Pychron Script	1	Fusions CO2	3	0	0	0	0	30	30	184			0	0.0329866	0.0084038	628.343	0.0658814	1.47258	0.0212518	0.0638401	0.0093123	0.0363806	0.0151533	-0.0005163	0.0003461	0.0551492	0.0039746	629.026	0.0651385	1.50715	0.0206856	0.0696762
67058-94	K17-133.5	37	2019-10-16	19.0333	3654097000	Heizler, M	DetritalSanidine	24	Heizler01192		localhost	7.875	Ar41 = A, deleting t<30 @ 10/17/19 8:30 AM; Ar40 = L @ 10/17/19 8:30 AM; Ar39 = L @ 10/17/19 8:30 AM; Ar38 = L @ 10/17/19 8:30 AM; Ar37 = L @ 10/17/19 8:30 AM; Ar36 = L @ 10/17/19 8:30 AM; Ar41 bk val,er = @ 10/17/19 8:35 AM; Average background @ 10/17/19 8:35 AM; Ar40 bk val,er = @ 10/17/19 8:35 AM; Line-segment interpolation @ 10/17/19 8:35 AM; Ar39 bk val,er = @ 10/17/19 8:35 AM; Average backg…	B:24 DS	ALLLLLAAAAAA	1	Pychron Script	1	Fusions CO2	3	0	0	0	0	30	30	185			0	0.0285695	0.0077535	76.2696	0.0197334	13.3725	0.0165928	0.172301	0.0065931	0.0342991	0.0117886	0.0122961	0.0004426	0.0507321	0.0023002	76.9638	0.0173244	13.407	0.0158612	0.178137
67058-95	K17-133.5	37	2019-10-16	19.1333	3654098000	Heizler, M	DetritalSanidine	24	Heizler01192		localhost	7.875	Ar41 = A, deleting t<30 @ 10/17/19 8:30 AM; Ar40 = L @ 10/17/19 8:30 AM; Ar39 = L @ 10/17/19 8:30 AM; Ar38 = L @ 10/17/19 8:30 AM; Ar37 = L @ 10/17/19 8:30 AM; Ar36 = L @ 10/17/19 8:30 AM; Ar41 bk val,er = @ 10/17/19 8:35 AM; Average background @ 10/17/19 8:35 AM; Ar40 bk val,er = @ 10/17/19 8:35 AM; Line-segment interpolation @ 10/17/19 8:35 AM; Ar39 bk val,er = @ 10/17/19 8:35 AM; Average backg…	B:24 DS	ALLLLLAAAAAA	1	Pychron Script	1	Fusions CO2	3	0	0	0	0	30	30	186			0	0.0286756	0.0078435	63.7894	0.0218365	26.1866	0.0181174	0.326763	0.006451	0.0770918	0.010747	0.0274465	0.0005584	0.0508382	0.0025873	64.4944	0.0198683	26.2212	0.0174499	0.3326
67058-96	K17-133.5	37	2019-10-16	19.25	3654098000	Heizler, M	DetritalSanidine	24	Heizler01192		localhost	7.875	Ar41 = A, deleting t<30 @ 10/17/19 8:30 AM; Ar40 = L @ 10/17/19 8:30 AM; Ar39 = L @ 10/17/19 8:30 AM; Ar38 = L @ 10/17/19 8:30 AM; Ar37 = L @ 10/17/19 8:30 AM; Ar36 = L @ 10/17/19 8:30 AM; Ar41 bk val,er = @ 10/17/19 8:35 AM; Average background @ 10/17/19 8:35 AM; Ar40 bk val,er = @ 10/17/19 8:35 AM; Line-segment interpolation @ 10/17/19 8:35 AM; Ar39 bk val,er = @ 10/17/19 8:35 AM; Average backg…	B:24 DS	ALLLLLAAAAAA	1	Pychron Script	1	Fusions CO2	3	0	0	0	0	30	30	187			0	0.041945	0.0079912	138.481	0.0257291	17.1171	0.015345	0.21857	0.0065817	0.0823089	0.0127886	0.0065762	0.0003393	0.0641076	0.0030054	139.196	0.0242085	17.1517	0.0145509	0.224407
67058-97	K17-133.5	37	2019-10-16	19.35	3654098000	Heizler, M	DetritalSanidine	24	Heizler01192		localhost	7.875	Ar41 = A, deleting t<30 @ 10/17/19 8:30 AM; Ar40 = L @ 10/17/19 8:30 AM; Ar39 = L @ 10/17/19 8:30 AM; Ar38 = L @ 10/17/19 8:30 AM; Ar37 = L @ 10/17/19 8:30 AM; Ar36 = L @ 10/17/19 8:30 AM; Ar41 bk val,er = @ 10/17/19 8:35 AM; Average background @ 10/17/19 8:35 AM; Ar40 bk val,er = @ 10/17/19 8:35 AM; Line-segment interpolation @ 10/17/19 8:35 AM; Ar39 bk val,er = @ 10/17/19 8:35 AM; Average backg…	B:24 DS	ALLLLLAAAAAA	1	Pychron Script	1	Fusions CO2	3	0	0	0	0	30	30	188			0	0.036081	0.0077097	247.155	0.032543	23.6776	0.0182906	0.299093	0.005877	0.0537171	0.0124046	0.0230599	0.0004841	0.0582436	0.0021479	247.881	0.0314362	23.7122	0.0176296	0.304929
67058-98	K17-133.5	37	2019-10-16	19.5667	3654099000	Heizler, M	DetritalSanidine	24	Heizler01192		localhost	7.875	Ar41 = A, deleting t<30 @ 10/17/19 8:30 AM; Ar40 = L @ 10/17/19 8:30 AM; Ar39 = L @ 10/17/19 8:30 AM; Ar38 = L @ 10/17/19 8:30 AM; Ar37 = L @ 10/17/19 8:30 AM; Ar36 = L @ 10/17/19 8:30 AM; Ar41 bk val,er = @ 10/17/19 8:35 AM; Average background @ 10/17/19 8:35 AM; Ar40 bk val,er = @ 10/17/19 8:35 AM; Line-segment interpolation @ 10/17/19 8:35 AM; Ar39 bk val,er = @ 10/17/19 8:35 AM; Average backg…	B:24 DS	ALLLLLAAAAAA	1	Pychron Script	1	Fusions CO2	3	0	0	0	0	30	30	189			0	0.0556351	0.0084778	914.206	0.0988481	18.5544	0.0335046	0.279359	0.0145022	0.105101	0.0224765	0.0329944	0.0009859	0.0777977	0.0041287	914.955	0.0985267	18.589	0.0331484	0.285195
67058-99	K17-133.5	37	2019-10-16	19.6833	3654100000	Heizler, M	DetritalSanidine	24	Heizler01192		localhost	7.875	Ar41 = A, deleting t<30 @ 10/17/19 8:30 AM; Ar40 = L @ 10/17/19 8:30 AM; Ar39 = L @ 10/17/19 8:30 AM; Ar38 = L @ 10/17/19 8:30 AM; Ar37 = L @ 10/17/19 8:30 AM; Ar36 = L @ 10/17/19 8:30 AM; Ar41 bk val,er = @ 10/17/19 8:35 AM; Average background @ 10/17/19 8:35 AM; Ar40 bk val,er = @ 10/17/19 8:35 AM; Line-segment interpolation @ 10/17/19 8:35 AM; Ar39 bk val,er = @ 10/17/19 8:35 AM; Average backg…	B:24 DS	ALLLLLAAAAAA	1	Pychron Script	1	Fusions CO2	3	0	0	0	0	30	30	190			0	0.0391235	0.007789	129.76	0.0270601	15.1608	0.0158217	0.19893	0.0066961	0.122348	0.0108361	0.0185033	0.0004471	0.0612861	0.0024172	130.521	0.0259004	15.1953	0.0150527	0.204766
67058-100	K17-133.5	37	2019-10-16	19.7833	3654100000	Heizler, M	DetritalSanidine	24	Heizler01192		localhost	7.875	Ar41 = A, deleting t<30 @ 10/17/19 8:30 AM; Ar40 = L @ 10/17/19 8:30 AM; Ar39 = L @ 10/17/19 8:30 AM; Ar38 = L @ 10/17/19 8:30 AM; Ar37 = L @ 10/17/19 8:30 AM; Ar36 = L @ 10/17/19 8:30 AM; Ar41 bk val,er = @ 10/17/19 8:35 AM; Average background @ 10/17/19 8:35 AM; Ar40 bk val,er = @ 10/17/19 8:35 AM; Line-segment interpolation @ 10/17/19 8:35 AM; Ar39 bk val,er = @ 10/17/19 8:35 AM; Average backg…	B:24 DS	ALLLLLAAAAAA	1	Pychron Script	1	Fusions CO2	3	0	0	0	0	30	30	191			0	0.0315108	0.0077971	275.723	0.0330244	27.2355	0.0182555	0.347541	0.0069242	0.0615575	0.0110932	0.0296377	0.0005663	0.0536734	0.0024431	276.495	0.0320947	27.27	0.0175932	0.353377
--- Atmospheric argon ratios and discrimination ---
(40Ar/36Ar)atm	295.5 ± 0.1
(40Ar/38Ar)atm	1575 ± 2
Source of spectrometer discrimination value and error	Data file
Source of spectrometer sensitivity value and error	Saved with run
--- Source of J and use of J Adjustment Table ---
Use J saved with run	TRUE
J adjustment table useage	Multiply times J
--- Minor irradiation parameters (see also Irradiation Data File) ---
(38Ar/37Ar)Ca	0.0000196 ± 8.160000e-7
(38Ar/39Ar)K	0.0122 ± 0.000027
P(36Cl/38Cl)	295.5 ± 0
--- Decay constants ---
Lambda 40K epsilon	5.463000e-10 ± 5.810000e-11
Lambda 40K Beta	0 ± 4.962000e-10
Lambda 37Ar	0.01975 ± 5.463000e-10
Lambda 39Ar	7.068000e-6 ± 5.530500e-10
Lambda 36Cl	6.308000e-9 ± 5.543000e-10
--- Calculation options ---
Normalize gain	FALSE
Use volume fraction delivered to ms to normalize gain	FALSE
Always calculate without ratios	TRUE
Calc. %40Ar* as %40*/(40*+40Atm)	TRUE
Number of trials in Monte Carlo sim.	1
37Ar/39Ar calculation	Normal
H35Cl Correction	FALSE
--- Isotope curve fitting ---
Parabolic vs. Linear probability cutoff	0.05
Error envelope as 1 or 2 sigma	1
Delete outliers within cycles before fit	FALSE
Average cycles before fit	FALSE
Delete outliers after fit	TRUE
Number of iterations of deleting outliers after fit	1
Cutoff for detecting outliers, sigma	3
Method of centroid location is	mean
--- Files ---
Irradiation data file	Macintosh HD:Users:matthewheizler:KAr:Aux Data:J Adjustment Table
J Adjustment table	Macintosh HD:Users:matthewheizler:KAr:Aux Data:J Adjustment Table
[truncated: 123 more columns]

## Sheet: K17-133.5_2nd
Run_ID	Sample	System	Run_Date	Run_Hour	Run_SecSince1904	PrincipalInvestigator	Material	Hole #	Project	Locality	File	Version	History	Comment	Fit_Type	Signal Norm.	Run Script	Fract_Deliv_To_MS	Heating_Dev	Pwr_Requested	Pwr_Achieved	Pwr_AchievedSD	Pwr_AchievedMax	OP_Temp	Tot_Dur_Heating	Dur_Heating_At_Req_Pwr	Holes	X_Y_Pos	Laser Scan File	Beam_Dia	Ar41_	Ar41_Er	Ar40_	Ar40_Er	Ar39_	Ar39_Er	Ar38_	Ar38_Er	Ar37_	Ar37_Er	Ar36_	Ar36_Er	Ar41_BslnCorOnly	Ar41_Er_BslnCorOnly	Ar40_BslnCorOnly	Ar40_Er_BslnCorOnly	Ar39_BslnCorOnly	Ar39_Er_BslnCorOnly	Ar38_BslnCorOnly
67058-101	K17-133.5	37	2019-10-16	19.8833	3654100000	Heizler, M	DetritalSanidine	24	Heizler01192		localhost	7.875	Ar41 = A, deleting t<30 @ 10/17/19 8:30 AM; Ar40 = L @ 10/17/19 8:30 AM; Ar39 = L @ 10/17/19 8:30 AM; Ar38 = L @ 10/17/19 8:30 AM; Ar37 = L @ 10/17/19 8:30 AM; Ar36 = L @ 10/17/19 8:30 AM; Ar41 bk val,er = @ 10/17/19 8:35 AM; Average background @ 10/17/19 8:35 AM; Ar40 bk val,er = @ 10/17/19 8:35 AM; Line-segment interpolation @ 10/17/19 8:35 AM; Ar39 bk val,er = @ 10/17/19 8:35 AM; Average backg…	B:24 DS	ALLLLLAAAAAA	1	Pychron Script	1	Fusions CO2	3	0	0	0	0	30	30	192			0	0.0334705	0.0078804	245.864	0.0331327	29.6963	0.0176417	0.374791	0.0063036	0.129764	0.0113953	0.0291808	0.0005619	0.0556331	0.002697	246.646	0.0322038	29.7309	0.0169555	0.380627
67058-102	K17-133.5	37	2019-10-16	20.3167	3654102000	Heizler, M	DetritalSanidine	24	Heizler01192		localhost	7.875	Ar41 = A, deleting t<30 @ 10/17/19 8:30 AM; Ar40 = L @ 10/17/19 8:30 AM; Ar39 = L @ 10/17/19 8:30 AM; Ar38 = L @ 10/17/19 8:30 AM; Ar37 = L @ 10/17/19 8:30 AM; Ar36 = L @ 10/17/19 8:30 AM; Ar41 bk val,er = @ 10/17/19 8:35 AM; Average background @ 10/17/19 8:35 AM; Ar40 bk val,er = @ 10/17/19 8:35 AM; Line-segment interpolation @ 10/17/19 8:35 AM; Ar39 bk val,er = @ 10/17/19 8:35 AM; Average backg…	B:24 DS	ALLLLLAAAAAA	1	Pychron Script	1	Fusions CO2	3	0	0	0	0	30	30	194			0	0.0311223	0.0077268	253.787	0.0315085	31.3916	0.0194855	0.389236	0.0060842	0.139232	0.012276	0.0156458	0.0004914	0.0532849	0.0022083	254.612	0.0303549	31.4261	0.0188664	0.395072
67058-103	K17-133.5	37	2019-10-16	20.4167	3654102000	Heizler, M	DetritalSanidine	24	Heizler01192		localhost	7.875	Ar41 = A, deleting t<30 @ 10/17/19 8:30 AM; Ar40 = L @ 10/17/19 8:30 AM; Ar39 = L @ 10/17/19 8:30 AM; Ar38 = L @ 10/17/19 8:30 AM; Ar37 = L @ 10/17/19 8:30 AM; Ar36 = L @ 10/17/19 8:30 AM; Ar41 bk val,er = @ 10/17/19 8:35 AM; Average background @ 10/17/19 8:35 AM; Ar40 bk val,er = @ 10/17/19 8:35 AM; Line-segment interpolation @ 10/17/19 8:35 AM; Ar39 bk val,er = @ 10/17/19 8:35 AM; Average backg…	B:24 DS	ALLLLLAAAAAA	1	Pychron Script	1	Fusions CO2	3	0	0	0	0	30	30	195			0	0.0375395	0.0078365	170.869	0.0267996	16.7797	0.016959	0.218528	0.0060581	0.0544593	0.0115355	0.010212	0.0004203	0.0597021	0.0025659	171.706	0.0253319	16.8142	0.016244	0.224365
67058-104	K17-133.5	37	2019-10-16	20.5167	3654103000	Heizler, M	DetritalSanidine	24	Heizler01192		localhost	7.875	Ar41 = A, deleting t<30 @ 10/17/19 8:30 AM; Ar40 = L @ 10/17/19 8:30 AM; Ar39 = L @ 10/17/19 8:30 AM; Ar38 = L @ 10/17/19 8:30 AM; Ar37 = L @ 10/17/19 8:30 AM; Ar36 = L @ 10/17/19 8:30 AM; Ar41 bk val,er = @ 10/17/19 8:35 AM; Average background @ 10/17/19 8:35 AM; Ar40 bk val,er = @ 10/17/19 8:35 AM; Line-segment interpolation @ 10/17/19 8:35 AM; Ar39 bk val,er = @ 10/17/19 8:35 AM; Average backg…	B:24 DS	ALLLLLAAAAAA	1	Pychron Script	1	Fusions CO2	3	0	0	0	0	30	30	196			0	0.0352406	0.0077668	317.167	0.041811	31.9212	0.0206273	0.382019	0.0065982	0.0859623	0.0131977	0.0402734	0.0006989	0.0574032	0.0023444	318.014	0.0408104	31.9557	0.0200435	0.387855
67058-105	K17-133.5	37	2019-10-16	20.5833	3654103000	Heizler, M	DetritalSanidine	24	Heizler01192		localhost	7.875	Ar41 = A, deleting t<30 @ 10/17/19 8:30 AM; Ar40 = L @ 10/17/19 8:30 AM; Ar39 = L @ 10/17/19 8:30 AM; Ar38 = L @ 10/17/19 8:30 AM; Ar37 = L @ 10/17/19 8:30 AM; Ar36 = L @ 10/17/19 8:30 AM; Ar41 bk val,er = @ 10/17/19 8:35 AM; Average background @ 10/17/19 8:35 AM; Ar40 bk val,er = @ 10/17/19 8:35 AM; Line-segment interpolation @ 10/17/19 8:35 AM; Ar39 bk val,er = @ 10/17/19 8:35 AM; Average backg…	B:24 DS	ALLLLLAAAAAA	1	Pychron Script	1	Fusions CO2	3	0	0	0	0	30	30	197			0	0.0947739	0.0122394	1585.99	0.311162	31.8311	0.0897079	0.479733	0.029099	0.177473	0.0554066	0.029758	0.0016307	0.116936	0.0097456	1586.85	0.311021	31.8656	0.0895755	0.485569
67058-106	K17-133.5	37	2019-10-16	20.6667	3654103000	Heizler, M	DetritalSanidine	24	Heizler01192		localhost	7.875	Ar41 = A, deleting t<30 @ 10/17/19 8:30 AM; Ar40 = L @ 10/17/19 8:30 AM; Ar39 = L @ 10/17/19 8:30 AM; Ar38 = L @ 10/17/19 8:30 AM; Ar37 = L @ 10/17/19 8:30 AM; Ar36 = L @ 10/17/19 8:30 AM; Ar41 bk val,er = @ 10/17/19 8:35 AM; Average background @ 10/17/19 8:35 AM; Ar40 bk val,er = @ 10/17/19 8:35 AM; Line-segment interpolation @ 10/17/19 8:35 AM; Ar39 bk val,er = @ 10/17/19 8:35 AM; Average backg…	B:24 DS	ALLLLLAAAAAA	1	Pychron Script	1	Fusions CO2	3	0	0	0	0	30	30	198			0	0.0462759	0.0082947	421.274	0.0773357	19.7862	0.0319931	0.267321	0.0142794	0.0882471	0.0179441	0.0062488	0.0005696	0.0684385	0.0037385	422.137	0.0767262	19.8207	0.0316198	0.273157
67058-107	K17-133.5	37	2019-10-16	20.7833	3654104000	Heizler, M	DetritalSanidine	24	Heizler01192		localhost	7.875	Ar41 = A, deleting t<30 @ 10/17/19 8:30 AM; Ar40 = L @ 10/17/19 8:30 AM; Ar39 = L @ 10/17/19 8:30 AM; Ar38 = L @ 10/17/19 8:30 AM; Ar37 = L @ 10/17/19 8:30 AM; Ar36 = L @ 10/17/19 8:30 AM; Ar41 bk val,er = @ 10/17/19 8:35 AM; Average background @ 10/17/19 8:35 AM; Ar40 bk val,er = @ 10/17/19 8:35 AM; Line-segment interpolation @ 10/17/19 8:35 AM; Ar39 bk val,er = @ 10/17/19 8:35 AM; Average backg…	B:24 DS	ALLLLLAAAAAA	1	Pychron Script	1	Fusions CO2	3	0	0	0	0	30	30	199			0	0.0438338	0.0078492	243.144	0.0383207	27.9351	0.0192984	0.349262	0.0070423	0.167288	0.0118436	0.0428866	0.000691	0.0659964	0.0026045	244.018	0.0369562	27.9697	0.0186732	0.355098
67058-108	K17-133.5	37	2019-10-16	21.0333	3654105000	Heizler, M	DetritalSanidine	24	Heizler01192		localhost	7.875	Ar41 = A, deleting t<30 @ 10/17/19 8:30 AM; Ar40 = L @ 10/17/19 8:30 AM; Ar39 = L @ 10/17/19 8:30 AM; Ar38 = L @ 10/17/19 8:30 AM; Ar37 = L @ 10/17/19 8:30 AM; Ar36 = L @ 10/17/19 8:30 AM; Ar41 bk val,er = @ 10/17/19 8:35 AM; Average background @ 10/17/19 8:35 AM; Ar40 bk val,er = @ 10/17/19 8:35 AM; Line-segment interpolation @ 10/17/19 8:35 AM; Ar39 bk val,er = @ 10/17/19 8:35 AM; Average backg…	B:24 DS	ALLLLLAAAAAA	1	Pychron Script	1	Fusions CO2	3	0	0	0	0	30	30	200			0	0.0343824	0.007774	129.392	0.028325	15.8594	0.0166192	0.203818	0.0059215	0.0452414	0.0114244	0.0039666	0.0003682	0.056545	0.0023682	130.288	0.0264452	15.894	0.0158889	0.209654
67058-109	K17-133.5	37	2019-10-16	21.1167	3654105000	Heizler, M	DetritalSanidine	24	Heizler01192		localhost	7.875	Ar41 = A, deleting t<30 @ 10/17/19 8:30 AM; Ar40 = L @ 10/17/19 8:30 AM; Ar39 = L @ 10/17/19 8:30 AM; Ar38 = L @ 10/17/19 8:30 AM; Ar37 = L @ 10/17/19 8:30 AM; Ar36 = L @ 10/17/19 8:30 AM; Ar41 bk val,er = @ 10/17/19 8:35 AM; Average background @ 10/17/19 8:35 AM; Ar40 bk val,er = @ 10/17/19 8:35 AM; Line-segment interpolation @ 10/17/19 8:35 AM; Ar39 bk val,er = @ 10/17/19 8:35 AM; Average backg…	B:24 DS	ALLLLLAAAAAA	1	Pychron Script	1	Fusions CO2	3	0	0	0	0	30	30	201			0	0.0186308	0.0079182	391.274	0.0556162	0.747834	0.0169571	0.0672868	0.0136861	0.0421507	0.0150687	-0.0013138	0.0003513	0.0407934	0.0028056	392.175	0.0547762	0.782404	0.0162419	0.0731229
67058-110	K17-133.5	37	2019-10-16	21.2333	3654105000	Heizler, M	DetritalSanidine	24	Heizler01192		localhost	7.875	Ar41 = A, deleting t<30 @ 10/17/19 8:30 AM; Ar40 = L @ 10/17/19 8:30 AM; Ar39 = L @ 10/17/19 8:30 AM; Ar38 = L @ 10/17/19 8:30 AM; Ar37 = L @ 10/17/19 8:30 AM; Ar36 = L @ 10/17/19 8:30 AM; Ar41 bk val,er = @ 10/17/19 8:35 AM; Average background @ 10/17/19 8:35 AM; Ar40 bk val,er = @ 10/17/19 8:35 AM; Line-segment interpolation @ 10/17/19 8:35 AM; Ar39 bk val,er = @ 10/17/19 8:35 AM; Average backg…	B:24 DS	ALLLLLAAAAAA	1	Pychron Script	1	Fusions CO2	3	0	0	0	0	30	30	202			0	0.0289089	0.0078357	181.538	0.027458	21.2036	0.0189445	0.273489	0.0070045	0.121412	0.01121	0.010242	0.0004067	0.0510715	0.0025636	182.446	0.0259372	21.2382	0.0183071	0.279326
67058-111	K17-133.5	37	2019-10-16	21.3	3654105000	Heizler, M	DetritalSanidine	24	Heizler01192		localhost	7.875	Ar41 = A, deleting t<30 @ 10/17/19 8:30 AM; Ar40 = L @ 10/17/19 8:30 AM; Ar39 = L @ 10/17/19 8:30 AM; Ar38 = L @ 10/17/19 8:30 AM; Ar37 = L @ 10/17/19 8:30 AM; Ar36 = L @ 10/17/19 8:30 AM; Ar41 bk val,er = @ 10/17/19 8:35 AM; Average background @ 10/17/19 8:35 AM; Ar40 bk val,er = @ 10/17/19 8:35 AM; Line-segment interpolation @ 10/17/19 8:35 AM; Ar39 bk val,er = @ 10/17/19 8:35 AM; Average backg…	B:24 DS	ALLLLLAAAAAA	1	Pychron Script	1	Fusions CO2	3	0	0	0	0	30	30	203			0	0.0910479	0.0118996	1950.85	0.345249	37.3591	0.107521	0.689847	0.0343937	0.100409	0.0496319	0.228732	0.0054358	0.113211	0.0093153	1951.76	0.34514	37.3937	0.107411	0.695683
67058-114	K17-133.5	37	2019-10-16	21.7333	3654107000	Heizler, M	DetritalSanidine	24	Heizler01192		localhost	7.875	Ar41 = A, deleting t<30 @ 10/17/19 8:30 AM; Ar40 = L @ 10/17/19 8:30 AM; Ar39 = L @ 10/17/19 8:30 AM; Ar38 = L @ 10/17/19 8:30 AM; Ar37 = L @ 10/17/19 8:30 AM; Ar36 = L @ 10/17/19 8:30 AM; Ar41 bk val,er = @ 10/17/19 8:35 AM; Average background @ 10/17/19 8:35 AM; Ar40 bk val,er = @ 10/17/19 8:35 AM; Line-segment interpolation @ 10/17/19 8:35 AM; Ar39 bk val,er = @ 10/17/19 8:35 AM; Average backg…	B:24 DS	ALLLLLAAAAAA	1	Pychron Script	1	Fusions CO2	3	0	0	0	0	30	30	206			0	0.0333969	0.0078636	4.6312	0.0148608	12.703	0.0162729	0.174306	0.0060793	0.0342134	0.0130755	0.0073827	0.0004135	0.0555595	0.0026477	5.56987	0.0127111	12.7376	0.0155263	0.180142
67058-115	K17-133.5	37	2019-10-16	21.8167	3654107000	Heizler, M	DetritalSanidine	24	Heizler01192		localhost	7.875	Ar41 = A, deleting t<30 @ 10/17/19 8:30 AM; Ar40 = L @ 10/17/19 8:30 AM; Ar39 = L @ 10/17/19 8:30 AM; Ar38 = L @ 10/17/19 8:30 AM; Ar37 = L @ 10/17/19 8:30 AM; Ar36 = L @ 10/17/19 8:30 AM; Ar41 bk val,er = @ 10/17/19 8:35 AM; Average background @ 10/17/19 8:35 AM; Ar40 bk val,er = @ 10/17/19 8:35 AM; Line-segment interpolation @ 10/17/19 8:35 AM; Ar39 bk val,er = @ 10/17/19 8:35 AM; Average backg…	B:24 DS	ALLLLLAAAAAA	1	Pychron Script	1	Fusions CO2	3	0	0	0	0	30	30	207			0	0.0450083	0.0085352	87.6885	0.0394578	6.13565	0.0297831	0.12242	0.0145655	0.0284486	0.0230183	0.009604	0.0006786	0.0671709	0.0042455	88.6324	0.0386845	6.17022	0.0293818	0.128256
67058-116	K17-133.5	37	2019-10-16	21.9	3654108000	Heizler, M	DetritalSanidine	24	Heizler01192		localhost	7.875	Ar41 = A, deleting t<30 @ 10/17/19 8:30 AM; Ar40 = L @ 10/17/19 8:30 AM; Ar39 = L @ 10/17/19 8:30 AM; Ar38 = L @ 10/17/19 8:30 AM; Ar37 = L @ 10/17/19 8:30 AM; Ar36 = L @ 10/17/19 8:30 AM; Ar41 bk val,er = @ 10/17/19 8:35 AM; Average background @ 10/17/19 8:35 AM; Ar40 bk val,er = @ 10/17/19 8:35 AM; Line-segment interpolation @ 10/17/19 8:35 AM; Ar39 bk val,er = @ 10/17/19 8:35 AM; Average backg…	B:24 DS	ALLLLLAAAAAA	1	Pychron Script	1	Fusions CO2	3	0	0	0	0	30	30	208			0	0.0654441	0.0084856	557.606	0.0804754	6.98432	0.0259983	0.181815	0.0161732	0.0397276	0.0197347	0.0717369	0.0012383	0.0876067	0.0041448	558.556	0.0800823	7.01889	0.0255376	0.187651
67058-117	K17-133.5	37	2019-10-16	22.0167	3654108000	Heizler, M	DetritalSanidine	24	Heizler01192		localhost	7.875	Ar41 = A, deleting t<30 @ 10/17/19 8:30 AM; Ar40 = L @ 10/17/19 8:30 AM; Ar39 = L @ 10/17/19 8:30 AM; Ar38 = L @ 10/17/19 8:30 AM; Ar37 = L @ 10/17/19 8:30 AM; Ar36 = L @ 10/17/19 8:30 AM; Ar41 bk val,er = @ 10/17/19 8:35 AM; Average background @ 10/17/19 8:35 AM; Ar40 bk val,er = @ 10/17/19 8:35 AM; Line-segment interpolation @ 10/17/19 8:35 AM; Ar39 bk val,er = @ 10/17/19 8:35 AM; Average backg…	B:24 DS	ALLLLLAAAAAA	1	Pychron Script	1	Fusions CO2	3	0	0	0	0	30	30	209			0	0.0443621	0.0079893	713.418	0.0646389	67.6001	0.0232167	0.855962	0.0063633	0.214211	0.0131875	0.0819204	0.0009268	0.0665247	0.0030006	714.373	0.0641086	67.6347	0.0226996	0.861798
67058-118	K17-133.5	37	2019-10-16	22.1	3654108000	Heizler, M	DetritalSanidine	24	Heizler01192		localhost	7.875	Ar41 = A, deleting t<30 @ 10/17/19 8:30 AM; Ar40 = L @ 10/17/19 8:30 AM; Ar39 = L @ 10/17/19 8:30 AM; Ar38 = L @ 10/17/19 8:30 AM; Ar37 = L @ 10/17/19 8:30 AM; Ar36 = L @ 10/17/19 8:30 AM; Ar41 bk val,er = @ 10/17/19 8:35 AM; Average background @ 10/17/19 8:35 AM; Ar40 bk val,er = @ 10/17/19 8:35 AM; Line-segment interpolation @ 10/17/19 8:35 AM; Ar39 bk val,er = @ 10/17/19 8:35 AM; Average backg…	B:24 DS	ALLLLLAAAAAA	1	Pychron Script	1	Fusions CO2	3	0	0	0	0	30	30	210			0	0.0364877	0.0089453	387.937	0.0519567	1.39093	0.0192401	0.073724	0.0129751	0.0335688	0.0165203	0.0007601	0.0003953	0.0586503	0.0050192	388.897	0.0512404	1.4255	0.0186129	0.0795601
67058-119	K17-133.5	37	2019-10-16	22.1833	3654109000	Heizler, M	DetritalSanidine	24	Heizler01192		localhost	7.875	Ar41 = A, deleting t<30 @ 10/17/19 8:30 AM; Ar40 = L @ 10/17/19 8:30 AM; Ar39 = L @ 10/17/19 8:30 AM; Ar38 = L @ 10/17/19 8:30 AM; Ar37 = L @ 10/17/19 8:30 AM; Ar36 = L @ 10/17/19 8:30 AM; Ar41 bk val,er = @ 10/17/19 8:35 AM; Average background @ 10/17/19 8:35 AM; Ar40 bk val,er = @ 10/17/19 8:35 AM; Line-segment interpolation @ 10/17/19 8:35 AM; Ar39 bk val,er = @ 10/17/19 8:35 AM; Average backg…	B:24 DS	ALLLLLAAAAAA	1	Pychron Script	1	Fusions CO2	3	0	0	0	0	30	30	211			0	0.0476291	0.0084647	437.369	0.0577413	18.1672	0.0280729	0.242337	0.0117894	0.06671	0.0213629	0.0091457	0.000748	0.0697917	0.0041018	438.335	0.0570343	18.2018	0.0276468	0.248173
67058-120	K17-133.5	37	2019-10-16	22.2833	3654109000	Heizler, M	DetritalSanidine	24	Heizler01192		localhost	7.875	Ar41 = A, deleting t<30 @ 10/17/19 8:30 AM; Ar40 = L @ 10/17/19 8:30 AM; Ar39 = L @ 10/17/19 8:30 AM; Ar38 = L @ 10/17/19 8:30 AM; Ar37 = L @ 10/17/19 8:30 AM; Ar36 = L @ 10/17/19 8:30 AM; Ar41 bk val,er = @ 10/17/19 8:35 AM; Average background @ 10/17/19 8:35 AM; Ar40 bk val,er = @ 10/17/19 8:35 AM; Line-segment interpolation @ 10/17/19 8:35 AM; Ar39 bk val,er = @ 10/17/19 8:35 AM; Average backg…	B:24 DS	ALLLLLAAAAAA	1	Pychron Script	1	Fusions CO2	3	0	0	0	0	30	30	212			0	0.0422313	0.0078904	360.021	0.0429893	43.8329	0.0195253	0.541667	0.0064519	0.133033	0.0107202	0.0120772	0.0004464	0.0643939	0.0027263	360.994	0.041908	43.8674	0.0189076	0.547503
67058-121	K17-133.5	37	2019-10-16	22.35	3654109000	Heizler, M	DetritalSanidine	24	Heizler01192		localhost	7.875	Ar41 = A, deleting t<30 @ 10/17/19 8:30 AM; Ar40 = L @ 10/17/19 8:30 AM; Ar39 = L @ 10/17/19 8:30 AM; Ar38 = L @ 10/17/19 8:30 AM; Ar37 = L @ 10/17/19 8:30 AM; Ar36 = L @ 10/17/19 8:30 AM; Ar41 bk val,er = @ 10/17/19 8:35 AM; Average background @ 10/17/19 8:35 AM; Ar40 bk val,er = @ 10/17/19 8:35 AM; Line-segment interpolation @ 10/17/19 8:35 AM; Ar39 bk val,er = @ 10/17/19 8:35 AM; Average backg…	B:24 DS	ALLLLLAAAAAA	1	Pychron Script	1	Fusions CO2	3	0	0	0	0	30	30	213			0	0.175206	0.0114814	2856.19	1.04157	50.5704	0.15956	0.93167	0.0839343	0.334151	0.0938992	0.125033	0.0089419	0.197369	0.0087747	2857.16	1.04153	50.605	0.159485	0.937506
67058-123	K17-133.5	37	2019-10-16	22.7	3654111000	Heizler, M	DetritalSanidine	24	Heizler01192		localhost	7.875	Ar41 = A, deleting t<30 @ 10/17/19 8:30 AM; Ar40 = L @ 10/17/19 8:30 AM; Ar39 = L @ 10/17/19 8:30 AM; Ar38 = L @ 10/17/19 8:30 AM; Ar37 = L @ 10/17/19 8:30 AM; Ar36 = L @ 10/17/19 8:30 AM; Ar41 bk val,er = @ 10/17/19 8:35 AM; Average background @ 10/17/19 8:35 AM; Ar40 bk val,er = @ 10/17/19 8:35 AM; Line-segment interpolation @ 10/17/19 8:35 AM; Ar39 bk val,er = @ 10/17/19 8:35 AM; Average backg…	B:24 DS	ALLLLLAAAAAA	1	Pychron Script	1	Fusions CO2	3	0	0	0	0	30	30	216			0	0.0390076	0.0078959	229.478	0.0340134	18.3871	0.019083	0.246945	0.007429	0.033653	0.0122188	0.0220112	0.0005078	0.0611702	0.002742	230.464	0.0340134	18.4216	0.0184504	0.252781
67058-124	K17-133.5	37	2019-10-16	22.8167	3654111000	Heizler, M	DetritalSanidine	24	Heizler01192		localhost	7.875	Ar41 = A, deleting t<30 @ 10/17/19 8:30 AM; Ar40 = L @ 10/17/19 8:30 AM; Ar39 = L @ 10/17/19 8:30 AM; Ar38 = L @ 10/17/19 8:30 AM; Ar37 = L @ 10/17/19 8:30 AM; Ar36 = L @ 10/17/19 8:30 AM; Ar41 bk val,er = @ 10/17/19 8:35 AM; Average background @ 10/17/19 8:35 AM; Ar40 bk val,er = @ 10/17/19 8:35 AM; Line-segment interpolation @ 10/17/19 8:35 AM; Ar39 bk val,er = @ 10/17/19 8:35 AM; Average backg…	B:24 DS	ALLLLLAAAAAA	1	Pychron Script	1	Fusions CO2	3	0	0	0	0	30	30	217			0	0.0403822	0.0079411	298.443	0.0360046	30.2505	0.0208936	0.368765	0.0071486	0.0800711	0.0132679	0.0240524	0.0005272	0.0625448	0.0028698	299.429	0.0360046	30.2851	0.0203175	0.374601
67058-125	K17-133.5	37	2019-10-16	22.9167	3654111000	Heizler, M	DetritalSanidine	24	Heizler01192		localhost	7.875	Ar41 = A, deleting t<30 @ 10/17/19 8:30 AM; Ar40 = L @ 10/17/19 8:30 AM; Ar39 = L @ 10/17/19 8:30 AM; Ar38 = L @ 10/17/19 8:30 AM; Ar37 = L @ 10/17/19 8:30 AM; Ar36 = L @ 10/17/19 8:30 AM; Ar41 bk val,er = @ 10/17/19 8:35 AM; Average background @ 10/17/19 8:35 AM; Ar40 bk val,er = @ 10/17/19 8:35 AM; Line-segment interpolation @ 10/17/19 2:35 PM; Ar39 bk val,er = @ 10/17/19 8:35 AM; Average backg…	B:24 DS	ALLLLLAAAAAA	1	Pychron Script	1	Fusions CO2	3	0	0	0	0	30	30	218			0	0.0331294	0.0079419	150.919	0.0265048	18.5146	0.0174247	0.227902	0.0063534	0.0801051	0.0134275	0.0052639	0.0003102	0.055292	0.0028719	151.904	0.0265048	18.5492	0.0167296	0.233738
67058-126	K17-133.5	37	2019-10-16	23.4167	3654113000	Heizler, M	DetritalSanidine	24	Heizler01192		localhost	7.875	Ar41 = A, deleting t<30 @ 10/17/19 8:30 AM; Ar40 = L @ 10/17/19 8:30 AM; Ar39 = L @ 10/17/19 8:30 AM; Ar38 = L @ 10/17/19 8:30 AM; Ar37 = L @ 10/17/19 8:30 AM; Ar36 = L @ 10/17/19 8:30 AM; Ar41 bk val,er = @ 10/17/19 8:35 AM; Average background @ 10/17/19 8:35 AM; Ar40 bk val,er = @ 10/17/19 8:35 AM; Line-segment interpolation @ 10/17/19 2:35 PM; Ar39 bk val,er = @ 10/17/19 8:35 AM; Average backg…	B:24 DS	ALLLLLAAAAAA	1	Pychron Script	1	Fusions CO2	3	0	0	0	0	30	30	219			0	0.152188	0.0131967	3983.88	0.602066	59.4812	0.282897	1.1042	0.0534887	0.331217	0.113003	0.0345758	0.0051709	0.17435	0.0109236	3984.87	0.602066	59.5158	0.282855	1.11003
67058-127	K17-133.5	37	2019-10-16	23.5167	3654114000	Heizler, M	DetritalSanidine	24	Heizler01192		localhost	7.875	Ar41 = A, deleting t<30 @ 10/17/19 8:30 AM; Ar40 = L @ 10/17/19 8:30 AM; Ar39 = L @ 10/17/19 8:30 AM; Ar38 = L @ 10/17/19 8:30 AM; Ar37 = L @ 10/17/19 8:30 AM; Ar36 = L @ 10/17/19 8:30 AM; Ar41 bk val,er = @ 10/17/19 8:35 AM; Average background @ 10/17/19 8:35 AM; Ar40 bk val,er = @ 10/17/19 8:35 AM; Line-segment interpolation @ 10/17/19 2:35 PM; Ar39 bk val,er = @ 10/17/19 8:35 AM; Average backg…	B:24 DS	ALLLLLAAAAAA	1	Pychron Script	1	Fusions CO2	3	0	0	0	0	30	30	220			0	0.0369225	0.0079446	166.965	0.0262829	16.2336	0.0169705	0.212419	0.0072582	0.061108	0.0120923	0.0172967	0.0004803	0.0590851	0.0028792	167.951	0.0262829	16.2682	0.016256	0.218255
67058-128	K17-133.5	37	2019-10-16	23.6333	3654114000	Heizler, M	DetritalSanidine	24	Heizler01192		localhost	7.875	Ar41 = A, deleting t<30 @ 10/17/19 8:30 AM; Ar40 = L @ 10/17/19 8:30 AM; Ar39 = L @ 10/17/19 8:30 AM; Ar38 = L @ 10/17/19 8:30 AM; Ar37 = L @ 10/17/19 8:30 AM; Ar36 = L @ 10/17/19 8:30 AM; Ar41 bk val,er = @ 10/17/19 8:35 AM; Average background @ 10/17/19 8:35 AM; Ar40 bk val,er = @ 10/17/19 8:35 AM; Line-segment interpolation @ 10/17/19 2:35 PM; Ar39 bk val,er = @ 10/17/19 8:35 AM; Average backg…	B:24 DS	ALLLLLAAAAAA	1	Pychron Script	1	Fusions CO2	3	0	0	0	0	30	30	221			0	0.0463419	0.0079558	606.753	0.0488122	58.8406	0.0203643	0.724862	0.0069635	0.171595	0.0119112	0.0187303	0.0005033	0.0685045	0.00291	607.739	0.0488122	58.8752	0.0197728	0.730698
67058-129	K17-133.5	37	2019-10-20	9.7	3654409000	Heizler, M	DetritalSanidine	24	Heizler01192		localhost	7.875	Ar41 = A, deleting t<30 @ 10/21/19 12:42 PM; Ar40 = L @ 10/21/19 12:42 PM; Ar39 = L @ 10/21/19 12:42 PM; Ar38 = L @ 10/21/19 12:42 PM; Ar37 = L @ 10/21/19 12:42 PM; Ar36 = L @ 10/21/19 12:42 PM; Ar41 bk val,er = @ 10/21/19 12:46 PM; Average background @ 10/21/19 12:46 PM; Ar40 bk val,er = @ 10/21/19 12:46 PM; Line-segment interpolation @ 10/21/19 12:46 PM; Ar39 bk val,er = @ 10/21/19 12:46 PM; Av…	B:24 DS	ALLLLLAAAAAA	1	Pychron Script	1	Fusions CO2	3	0	0	0	0	30	30	134			0	0.0242381	0.0035617	342.777	0.0425681	20.2555	0.01776	0.258498	0.0072358	0.053566	0.0116524	0.0218845	0.0005448	0.0495337	0.002817	343.557	0.0411626	20.3059	0.0163166	0.264405
67058-130	K17-133.5	37	2019-10-20	10.5333	3654412000	Heizler, M	DetritalSanidine	24	Heizler01192		localhost	7.875	Ar41 = A, deleting t<30 @ 10/21/19 12:42 PM; Ar40 = L @ 10/21/19 12:42 PM; Ar39 = L @ 10/21/19 12:42 PM; Ar38 = L @ 10/21/19 12:42 PM; Ar37 = L @ 10/21/19 12:42 PM; Ar36 = L @ 10/21/19 12:42 PM; Ar41 bk val,er = @ 10/21/19 12:46 PM; Average background @ 10/21/19 12:46 PM; Ar40 bk val,er = @ 10/21/19 12:46 PM; Line-segment interpolation @ 10/21/19 12:46 PM; Ar39 bk val,er = @ 10/21/19 12:46 PM; Av…	B:24 DS	ALLLLLAAAAAA	1	Pychron Script	1	Fusions CO2	3	0	0	0	0	30	30	135			0	0.0195775	0.0038895	583.483	0.0671366	1.90471	0.0213071	0.0634966	0.0104366	0.0242957	0.0164425	-0.0004935	0.0003621	0.0448732	0.0032215	584.272	0.0664352	1.95511	0.0201199	0.0694034
67058-131	K17-133.5	37	2019-10-20	10.7333	3654413000	Heizler, M	DetritalSanidine	24	Heizler01192		localhost	7.875	Ar41 = A, deleting t<30 @ 10/21/19 12:42 PM; Ar40 = L @ 10/21/19 12:42 PM; Ar39 = L @ 10/21/19 12:42 PM; Ar38 = L @ 10/21/19 12:42 PM; Ar37 = L @ 10/21/19 12:42 PM; Ar36 = L @ 10/21/19 12:42 PM; Ar41 bk val,er = @ 10/21/19 12:46 PM; Average background @ 10/21/19 12:46 PM; Ar40 bk val,er = @ 10/21/19 12:46 PM; Line-segment interpolation @ 10/21/19 12:46 PM; Ar39 bk val,er = @ 10/21/19 12:46 PM; Av…	B:24 DS	ALLLLLAAAAAA	1	Pychron Script	1	Fusions CO2	3	0	0	0	0	30	30	136			0	0.0036637	0.0024947	54.3837	0.01448	17.1723	0.0100943	0.219363	0.0037065	0.104064	0.0068579	0.0332305	0.0003294	0.0289593	0.0012139	55.1749	0.0110659	17.2227	0.0072602	0.22527
67058-132	K17-133.5	37	2019-10-20	10.8667	3654414000	Heizler, M	DetritalSanidine	24	Heizler01192		localhost	7.875	Ar41 = A, deleting t<30 @ 10/21/19 12:42 PM; Ar40 = L @ 10/21/19 12:42 PM; Ar39 = L @ 10/21/19 12:42 PM; Ar38 = L @ 10/21/19 12:42 PM; Ar37 = L @ 10/21/19 12:42 PM; Ar36 = L @ 10/21/19 12:42 PM; Ar41 bk val,er = @ 10/21/19 12:46 PM; Average background @ 10/21/19 12:46 PM; Ar40 bk val,er = @ 10/21/19 12:46 PM; Line-segment interpolation @ 10/21/19 12:46 PM; Ar39 bk val,er = @ 10/21/19 12:46 PM; Av…	B:24 DS	ALLLLLAAAAAA	1	Pychron Script	1	Fusions CO2	3	0	0	0	0	30	30	137			0	0.0177552	0.0032086	188.222	0.0272641	16.9235	0.0178632	0.220341	0.0067996	0.0637924	0.0129593	0.0175072	0.0004273	0.0430508	0.0023548	189.015	0.0256814	16.9739	0.0164289	0.226247
67058-133	K17-133.5	37	2019-10-20	13.9	3654424000	Heizler, M	DetritalSanidine	24	Heizler01192		localhost	7.875	Ar41 = A, deleting t<30 @ 10/21/19 12:42 PM; Ar40 = L @ 10/21/19 12:42 PM; Ar39 = L @ 10/21/19 12:42 PM; Ar38 = L @ 10/21/19 12:42 PM; Ar37 = L @ 10/21/19 12:42 PM; Ar36 = L @ 10/21/19 12:42 PM; Ar41 bk val,er = @ 10/21/19 12:46 PM; Average background @ 10/21/19 12:46 PM; Ar40 bk val,er = @ 10/21/19 12:46 PM; Line-segment interpolation @ 10/21/19 12:46 PM; Ar39 bk val,er = @ 10/21/19 12:46 PM; Av…	B:24 DS	ALLLLLAAAAAA	1	Pychron Script	1	Fusions CO2	3	0	0	0	0	30	30	139			0	0.0394021	0.0044813	709.411	0.102055	12.315	0.0268112	0.202168	0.0110979	0.0472057	0.0227665	0.0571493	0.0012055	0.0646977	0.0039156	710.242	0.101717	12.3654	0.0258777	0.208075
67058-134	K17-133.5	37	2019-10-20	14.0167	3654425000	Heizler, M	DetritalSanidine	24	Heizler01192		localhost	7.875	Ar41 = A, deleting t<30 @ 10/21/19 12:42 PM; Ar40 = L @ 10/21/19 12:42 PM; Ar39 = L @ 10/21/19 12:42 PM; Ar38 = L @ 10/21/19 12:42 PM; Ar37 = L @ 10/21/19 12:42 PM; Ar36 = L @ 10/21/19 12:42 PM; Ar41 bk val,er = @ 10/21/19 12:46 PM; Average background @ 10/21/19 12:46 PM; Ar40 bk val,er = @ 10/21/19 12:46 PM; Line-segment interpolation @ 10/21/19 12:46 PM; Ar39 bk val,er = @ 10/21/19 12:46 PM; Av…	B:24 DS	ALLLLLAAAAAA	1	Pychron Script	1	Fusions CO2	3	0	0	0	0	30	30	140			0	0.0283113	0.0034832	228.856	0.0273125	22.7019	0.0187634	0.316136	0.0064331	0.0987653	0.0133825	0.15022	0.0012372	0.0536069	0.0027171	229.689	0.0259776	22.7523	0.0174035	0.322043
67058-135	K17-133.5	37	2019-10-20	14.0833	3654425000	Heizler, M	DetritalSanidine	24	Heizler01192		localhost	7.875	Ar41 = A, deleting t<30 @ 10/21/19 12:42 PM; Ar40 = L @ 10/21/19 12:42 PM; Ar39 = L @ 10/21/19 12:42 PM; Ar38 = L @ 10/21/19 12:42 PM; Ar37 = L @ 10/21/19 12:42 PM; Ar36 = L @ 10/21/19 12:42 PM; Ar41 bk val,er = @ 10/21/19 12:46 PM; Average background @ 10/21/19 12:46 PM; Ar40 bk val,er = @ 10/21/19 12:46 PM; Line-segment interpolation @ 10/21/19 12:46 PM; Ar39 bk val,er = @ 10/21/19 12:46 PM; Av…	B:24 DS	ALLLLLAAAAAA	1	Pychron Script	1	Fusions CO2	3	0	0	0	0	30	30	141			0	0.150056	0.0098733	4059.71	0.803487	43.735	0.186623	0.729985	0.056589	0.119163	0.10347	0.305487	0.0097242	0.175351	0.0096298	4060.54	0.803442	43.7854	0.186491	0.735892
67058-136	K17-133.5	37	2019-10-20	14.2	3654426000	Heizler, M	DetritalSanidine	24	Heizler01192		localhost	7.875	Ar41 = A, deleting t<30 @ 10/21/19 12:42 PM; Ar40 = L @ 10/21/19 12:42 PM; Ar39 = L @ 10/21/19 12:42 PM; Ar38 = L @ 10/21/19 12:42 PM; Ar37 = L @ 10/21/19 12:42 PM; Ar36 = L @ 10/21/19 12:42 PM; Ar41 bk val,er = @ 10/21/19 12:46 PM; Average background @ 10/21/19 12:46 PM; Ar40 bk val,er = @ 10/21/19 12:46 PM; Line-segment interpolation @ 10/21/19 12:46 PM; Ar39 bk val,er = @ 10/21/19 12:46 PM; Av…	B:24 DS	ALLLLLAAAAAA	1	Pychron Script	1	Fusions CO2	3	0	0	0	0	30	30	142			0	0.0400066	0.0035931	546.553	0.0459474	52.3569	0.0214145	0.655297	0.0063322	0.159412	0.0123701	0.0323405	0.0006048	0.0653023	0.0028566	547.388	0.0451237	52.4073	0.0202336	0.661203
67058-137	K17-133.5	37	2019-10-20	14.3	3654426000	Heizler, M	DetritalSanidine	24	Heizler01192		localhost	7.875	Ar41 = A, deleting t<30 @ 10/21/19 12:42 PM; Ar40 = L @ 10/21/19 12:42 PM; Ar39 = L @ 10/21/19 12:42 PM; Ar38 = L @ 10/21/19 12:42 PM; Ar37 = L @ 10/21/19 12:42 PM; Ar36 = L @ 10/21/19 12:42 PM; Ar41 bk val,er = @ 10/21/19 12:46 PM; Average background @ 10/21/19 12:46 PM; Ar40 bk val,er = @ 10/21/19 12:46 PM; Line-segment interpolation @ 10/21/19 12:46 PM; Ar39 bk val,er = @ 10/21/19 12:46 PM; Av…	B:24 DS	ALLLLLAAAAAA	1	Pychron Script	1	Fusions CO2	3	0	0	0	0	30	30	143			0	0.0467045	0.0040174	1061.85	0.134674	10.8744	0.0282235	0.170452	0.0135109	0.0679874	0.023726	0.0604871	0.0012937	0.0720002	0.0033748	1062.68	0.134387	10.9248	0.0273383	0.176359
67058-138	K17-133.5	37	2019-10-20	14.4	3654426000	Heizler, M	DetritalSanidine	24	Heizler01192		localhost	7.875	Ar41 = A, deleting t<30 @ 10/21/19 12:42 PM; Ar40 = L @ 10/21/19 12:42 PM; Ar39 = L @ 10/21/19 12:42 PM; Ar38 = L @ 10/21/19 12:42 PM; Ar37 = L @ 10/21/19 12:42 PM; Ar36 = L @ 10/21/19 12:42 PM; Ar41 bk val,er = @ 10/21/19 12:46 PM; Average background @ 10/21/19 12:46 PM; Ar40 bk val,er = @ 10/21/19 12:46 PM; Line-segment interpolation @ 10/21/19 12:46 PM; Ar39 bk val,er = @ 10/21/19 12:46 PM; Av…	B:24 DS	ALLLLLAAAAAA	1	Pychron Script	1	Fusions CO2	3	0	0	0	0	30	30	144			0	0.0372108	0.003388	314.725	0.0362915	30.504	0.0187432	0.37777	0.0070626	0.078715	0.0116773	0.0288243	0.000577	0.0625065	0.0025939	315.563	0.0351726	30.5544	0.0173817	0.383676
67058-139	K17-133.5	37	2019-10-20	14.5167	3654427000	Heizler, M	DetritalSanidine	24	Heizler01192		localhost	7.875	Ar41 = A, deleting t<30 @ 10/21/19 12:42 PM; Ar40 = L @ 10/21/19 12:42 PM; Ar39 = L @ 10/21/19 12:42 PM; Ar38 = L @ 10/21/19 12:42 PM; Ar37 = L @ 10/21/19 12:42 PM; Ar36 = L @ 10/21/19 12:42 PM; Ar41 bk val,er = @ 10/21/19 12:46 PM; Average background @ 10/21/19 12:46 PM; Ar40 bk val,er = @ 10/21/19 12:46 PM; Line-segment interpolation @ 10/21/19 12:46 PM; Ar39 bk val,er = @ 10/21/19 12:46 PM; Av…	B:24 DS	ALLLLLAAAAAA	1	Pychron Script	1	Fusions CO2	3	0	0	0	0	30	30	145			0	0.0240417	0.0033877	265.785	0.0376036	21.3344	0.0191401	0.286836	0.0063091	0.0688581	0.0126345	0.0160125	0.0004788	0.0493374	0.0025935	266.625	0.0364839	21.3848	0.0178089	0.292743
67058-140	K17-133.5	37	2019-10-20	14.6333	3654427000	Heizler, M	DetritalSanidine	24	Heizler01192		localhost	7.875	Ar41 = A, deleting t<30 @ 10/21/19 12:42 PM; Ar40 = L @ 10/21/19 12:42 PM; Ar39 = L @ 10/21/19 12:42 PM; Ar38 = L @ 10/21/19 12:42 PM; Ar37 = L @ 10/21/19 12:42 PM; Ar36 = L @ 10/21/19 12:42 PM; Ar41 bk val,er = @ 10/21/19 12:46 PM; Average background @ 10/21/19 12:46 PM; Ar40 bk val,er = @ 10/21/19 12:46 PM; Line-segment interpolation @ 10/21/19 12:46 PM; Ar39 bk val,er = @ 10/21/19 12:46 PM; Av…	B:24 DS	ALLLLLAAAAAA	1	Pychron Script	1	Fusions CO2	3	0	0	0	0	30	30	146			0	0.0269121	0.0035132	166.109	0.0246219	17.1495	0.0181829	0.212088	0.0064376	0.0749666	0.0110592	0.0210782	0.0004488	0.0522077	0.0027554	166.95	0.0228065	17.1999	0.016776	0.217995
67058-141	K17-133.5	37	2019-10-20	14.7	3654427000	Heizler, M	DetritalSanidine	24	Heizler01192		localhost	7.875	Ar41 = A, deleting t<30 @ 10/21/19 12:42 PM; Ar40 = L @ 10/21/19 12:42 PM; Ar39 = L @ 10/21/19 12:42 PM; Ar38 = L @ 10/21/19 12:42 PM; Ar37 = L @ 10/21/19 12:42 PM; Ar36 = L @ 10/21/19 12:42 PM; Ar41 bk val,er = @ 10/21/19 12:46 PM; Average background @ 10/21/19 12:46 PM; Ar40 bk val,er = @ 10/21/19 12:46 PM; Line-segment interpolation @ 10/21/19 12:46 PM; Ar39 bk val,er = @ 10/21/19 12:46 PM; Av…	B:24 DS	ALLLLLAAAAAA	1	Pychron Script	1	Fusions CO2	3	0	0	0	0	30	30	147			0	0.0911515	0.0093974	1588.35	0.366311	24.8154	0.0834811	0.459519	0.0441283	0.0985284	0.0483488	0.0334221	0.0013876	0.116447	0.0091412	1589.2	0.366191	24.8658	0.083186	0.465426
67058-142	K17-133.5	37	2019-10-20	14.8	3654428000	Heizler, M	DetritalSanidine	24	Heizler01192		localhost	7.875	Ar41 = A, deleting t<30 @ 10/21/19 12:42 PM; Ar40 = L @ 10/21/19 12:42 PM; Ar39 = L @ 10/21/19 12:42 PM; Ar38 = L @ 10/21/19 12:42 PM; Ar37 = L @ 10/21/19 12:42 PM; Ar36 = L @ 10/21/19 12:42 PM; Ar41 bk val,er = @ 10/21/19 12:46 PM; Average background @ 10/21/19 12:46 PM; Ar40 bk val,er = @ 10/21/19 12:46 PM; Line-segment interpolation @ 10/21/19 12:46 PM; Ar39 bk val,er = @ 10/21/19 12:46 PM; Av…	B:24 DS	ALLLLLAAAAAA	1	Pychron Script	1	Fusions CO2	3	0	0	0	0	30	30	148			0	0.0483135	0.0042529	273.615	0.0624419	16.4072	0.0330603	0.238253	0.0114244	0.0728618	0.0199698	0.0088603	0.000598	0.0736091	0.0036519	274.459	0.0617056	16.4576	0.0323078	0.24416
67058-143	K17-133.5	37	2019-10-20	15.0167	3654429000	Heizler, M	DetritalSanidine	24	Heizler01192		localhost	7.875	Ar41 = A, deleting t<30 @ 10/21/19 12:42 PM; Ar40 = L @ 10/21/19 12:42 PM; Ar39 = L @ 10/21/19 12:42 PM; Ar38 = L @ 10/21/19 12:42 PM; Ar37 = L @ 10/21/19 12:42 PM; Ar36 = L @ 10/21/19 12:42 PM; Ar41 bk val,er = @ 10/21/19 12:46 PM; Average background @ 10/21/19 12:46 PM; Ar40 bk val,er = @ 10/21/19 12:46 PM; Line-segment interpolation @ 10/21/19 12:46 PM; Ar39 bk val,er = @ 10/21/19 12:46 PM; Av…	B:24 DS	ALLLLLAAAAAA	1	Pychron Script	1	Fusions CO2	3	0	0	0	0	30	30	149			0	0.0480877	0.0049233	229.342	0.0661699	14.7381	0.0336202	0.224241	0.0137813	0.0294946	0.0202153	0.0308488	0.0010687	0.0733834	0.0044146	230.188	0.0654187	14.7886	0.0328806	0.230148
67058-144	K17-133.5	37	2019-10-20	15.1167	3654429000	Heizler, M	DetritalSanidine	24	Heizler01192		localhost	7.875	Ar41 = A, deleting t<30 @ 10/21/19 12:42 PM; Ar40 = L @ 10/21/19 12:42 PM; Ar39 = L @ 10/21/19 12:42 PM; Ar38 = L @ 10/21/19 12:42 PM; Ar37 = L @ 10/21/19 12:42 PM; Ar36 = L @ 10/21/19 12:42 PM; Ar41 bk val,er = @ 10/21/19 12:46 PM; Average background @ 10/21/19 12:46 PM; Ar40 bk val,er = @ 10/21/19 12:46 PM; Line-segment interpolation @ 10/21/19 12:46 PM; Ar39 bk val,er = @ 10/21/19 12:46 PM; Av…	B:24 DS	ALLLLLAAAAAA	1	Pychron Script	1	Fusions CO2	3	0	0	0	0	30	30	150			0	0.0470831	0.0042608	463.139	0.0722232	21.4134	0.0291245	0.293425	0.011768	0.0538682	0.0189806	0.044855	0.001072	0.0723788	0.0036612	463.987	0.0715112	21.4638	0.0282675	0.299332
67058-145	K17-133.5	37	2019-10-20	15.2333	3654429000	Heizler, M	DetritalSanidine	24	Heizler01192		localhost	7.875	Ar41 = A, deleting t<30 @ 10/21/19 12:42 PM; Ar40 = L @ 10/21/19 12:42 PM; Ar39 = L @ 10/21/19 12:42 PM; Ar38 = L @ 10/21/19 12:42 PM; Ar37 = L @ 10/21/19 12:42 PM; Ar36 = L @ 10/21/19 12:42 PM; Ar41 bk val,er = @ 10/21/19 12:46 PM; Average background @ 10/21/19 12:46 PM; Ar40 bk val,er = @ 10/21/19 12:46 PM; Line-segment interpolation @ 10/21/19 12:46 PM; Ar39 bk val,er = @ 10/21/19 12:46 PM; Av…	B:24 DS	ALLLLLAAAAAA	1	Pychron Script	1	Fusions CO2	3	0	0	0	0	30	30	151			0	0.0283812	0.0038901	5.10792	0.0159565	0.0744928	0.0204022	0.0226126	0.0085693	0.0326206	0.0147903	0.0124883	0.0005336	0.0536769	0.0032222	5.95679	0.0121725	0.124895	0.019159	0.0285194
67058-146	K17-133.5	37	2019-10-20	15.5	3654430000	Heizler, M	DetritalSanidine	24	Heizler01192		localhost	7.875	Ar41 = A, deleting t<30 @ 10/21/19 12:42 PM; Ar40 = L @ 10/21/19 12:42 PM; Ar39 = L @ 10/21/19 12:42 PM; Ar38 = L @ 10/21/19 12:42 PM; Ar37 = L @ 10/21/19 12:42 PM; Ar36 = L @ 10/21/19 12:42 PM; Ar41 bk val,er = @ 10/21/19 12:46 PM; Average background @ 10/21/19 12:46 PM; Ar40 bk val,er = @ 10/21/19 12:46 PM; Line-segment interpolation @ 10/21/19 12:46 PM; Ar39 bk val,er = @ 10/21/19 12:46 PM; Av…	B:24 DS	ALLLLLAAAAAA	1	Pychron Script	1	Fusions CO2	3	0	0	0	0	30	30	152			0	0.0288513	0.0036221	302.174	0.0402284	31.0607	0.0192565	0.399162	0.0063525	0.117524	0.0126843	0.0420964	0.0006475	0.0541469	0.002893	303.027	0.0389274	31.1111	0.017934	0.405068
67058-147	K17-133.5	37	2019-10-20	15.5833	3654431000	Heizler, M	DetritalSanidine	24	Heizler01192		localhost	7.875	Ar41 = A, deleting t<30 @ 10/21/19 12:42 PM; Ar40 = L @ 10/21/19 12:42 PM; Ar39 = L @ 10/21/19 12:42 PM; Ar38 = L @ 10/21/19 12:42 PM; Ar37 = L @ 10/21/19 12:42 PM; Ar36 = L @ 10/21/19 12:42 PM; Ar41 bk val,er = @ 10/21/19 12:46 PM; Average background @ 10/21/19 12:46 PM; Ar40 bk val,er = @ 10/21/19 12:46 PM; Line-segment interpolation @ 10/21/19 12:46 PM; Ar39 bk val,er = @ 10/21/19 12:46 PM; Av…	B:24 DS	ALLLLLAAAAAA	1	Pychron Script	1	Fusions CO2	3	0	0	0	0	30	30	153			0	0.056984	0.0046589	1081.7	0.13443	16.6145	0.0282502	0.231981	0.0097156	0.0475034	0.0204677	0.0154249	0.0007584	0.0822796	0.0041177	1082.56	0.134076	16.6649	0.0273658	0.237888
67058-148	K17-133.5	37	2019-10-20	15.7	3654431000	Heizler, M	DetritalSanidine	24	Heizler01192		localhost	7.875	Ar41 = A, deleting t<30 @ 10/21/19 12:42 PM; Ar40 = L @ 10/21/19 12:42 PM; Ar39 = L @ 10/21/19 12:42 PM; Ar38 = L @ 10/21/19 12:42 PM; Ar37 = L @ 10/21/19 12:42 PM; Ar36 = L @ 10/21/19 12:42 PM; Ar41 bk val,er = @ 10/21/19 12:46 PM; Average background @ 10/21/19 12:46 PM; Ar40 bk val,er = @ 10/21/19 12:46 PM; Line-segment interpolation @ 10/21/19 12:46 PM; Ar39 bk val,er = @ 10/21/19 12:46 PM; Av…	B:24 DS	ALLLLLAAAAAA	1	Pychron Script	1	Fusions CO2	3	0	0	0	0	30	30	154			0	0.0264694	0.0036613	168.892	0.0311887	20.0199	0.0165489	0.262154	0.0065397	0.118059	0.0135671	0.0295101	0.000586	0.0517651	0.002942	169.751	0.0297727	20.0703	0.0149894	0.268061
67058-149	K17-133.5	37	2019-10-20	15.8	3654431000	Heizler, M	DetritalSanidine	24	Heizler01192		localhost	7.875	Ar41 = A, deleting t<30 @ 10/21/19 12:42 PM; Ar40 = L @ 10/21/19 12:42 PM; Ar39 = L @ 10/21/19 12:42 PM; Ar38 = L @ 10/21/19 12:42 PM; Ar37 = L @ 10/21/19 12:42 PM; Ar36 = L @ 10/21/19 12:42 PM; Ar41 bk val,er = @ 10/21/19 12:46 PM; Average background @ 10/21/19 12:46 PM; Ar40 bk val,er = @ 10/21/19 12:46 PM; Line-segment interpolation @ 10/21/19 12:46 PM; Ar39 bk val,er = @ 10/21/19 12:46 PM; Av…	B:24 DS	ALLLLLAAAAAA	1	Pychron Script	1	Fusions CO2	3	0	0	0	0	30	30	155			0	0.0660818	0.0051787	972.458	0.12096	15.6352	0.0291336	0.286655	0.0142565	0.129374	0.0220376	0.276106	0.0024391	0.0913774	0.0046977	973.321	0.120629	15.6856	0.0282769	0.292561
67058-150	K17-133.5	37	2019-10-20	15.8833	3654432000	Heizler, M	DetritalSanidine	24	Heizler01192		localhost	7.875	Ar41 = A, deleting t<30 @ 10/21/19 12:42 PM; Ar40 = L @ 10/21/19 12:42 PM; Ar39 = L @ 10/21/19 12:42 PM; Ar38 = L @ 10/21/19 12:42 PM; Ar37 = L @ 10/21/19 12:42 PM; Ar36 = L @ 10/21/19 12:42 PM; Ar41 bk val,er = @ 10/21/19 12:47 PM; Average background @ 10/21/19 12:47 PM; Ar40 bk val,er = @ 10/21/19 12:47 PM; Line-segment interpolation @ 10/21/19 12:47 PM; Ar39 bk val,er = @ 10/21/19 12:47 PM; Av…	B:24 DS	ALLLLLAAAAAA	1	Pychron Script	1	Fusions CO2	3	0	0	0	0	30	30	156			0	0.124286	0.0041592	3813.86	0.585779	8.41709	0.0863879	0.233419	0.0433383	0.126319	0.0561612	0.0131699	0.0020426	0.149582	0.0035424	3814.72	0.585715	8.46749	0.0861027	0.239325
67058-151	K17-133.5	37	2019-10-20	15.9833	3654432000	Heizler, M	DetritalSanidine	24	Heizler01192		localhost	7.875	Ar41 = A, deleting t<30 @ 10/21/19 12:42 PM; Ar40 = L @ 10/21/19 12:42 PM; Ar39 = L @ 10/21/19 12:42 PM; Ar38 = L @ 10/21/19 12:42 PM; Ar37 = L @ 10/21/19 12:42 PM; Ar36 = L @ 10/21/19 12:42 PM; Ar41 bk val,er = @ 10/21/19 12:47 PM; Average background @ 10/21/19 12:47 PM; Ar40 bk val,er = @ 10/21/19 12:47 PM; Line-segment interpolation @ 10/21/19 12:47 PM; Ar39 bk val,er = @ 10/21/19 12:47 PM; Av…	B:24 DS	ALLLLLAAAAAA	1	Pychron Script	1	Fusions CO2	3	0	0	0	0	30	30	157			0	0.034492	0.0034569	536.452	0.0434492	52.2296	0.0230166	0.648452	0.0073373	0.125981	0.0121721	0.0332174	0.0005883	0.0597877	0.0026832	537.32	0.0426452	52.28	0.0219221	0.654359
67058-152	K17-133.5	37	2019-10-20	16.0833	3654432000	Heizler, M	DetritalSanidine	24	Heizler01192		localhost	7.875	Ar41 = A, deleting t<30 @ 10/21/19 12:42 PM; Ar40 = L @ 10/21/19 12:42 PM; Ar39 = L @ 10/21/19 12:42 PM; Ar38 = L @ 10/21/19 12:42 PM; Ar37 = L @ 10/21/19 12:42 PM; Ar36 = L @ 10/21/19 12:42 PM; Ar41 bk val,er = @ 10/21/19 12:47 PM; Average background @ 10/21/19 12:47 PM; Ar40 bk val,er = @ 10/21/19 12:47 PM; Line-segment interpolation @ 10/21/19 12:47 PM; Ar39 bk val,er = @ 10/21/19 12:47 PM; Av…	B:24 DS	ALLLLLAAAAAA	1	Pychron Script	1	Fusions CO2	3	0	0	0	0	30	30	158			0	0.0427484	0.0047658	478.95	0.0716388	20.9472	0.0329548	0.282866	0.0131735	0.0694639	0.0260006	0.0121406	0.0007095	0.0680441	0.0042383	479.82	0.0711832	20.9976	0.0321999	0.288773
67058-153	K17-133.5	37	2019-10-20	16.3333	3654433000	Heizler, M	DetritalSanidine	24	Heizler01192		localhost	7.875	Ar41 = A, deleting t<30 @ 10/21/19 12:42 PM; Ar40 = L @ 10/21/19 12:42 PM; Ar39 = L @ 10/21/19 12:42 PM; Ar38 = L @ 10/21/19 12:42 PM; Ar37 = L @ 10/21/19 12:42 PM; Ar36 = L @ 10/21/19 12:42 PM; Ar41 bk val,er = @ 10/21/19 12:47 PM; Average background @ 10/21/19 12:47 PM; Ar40 bk val,er = @ 10/21/19 12:47 PM; Line-segment interpolation @ 10/21/19 12:47 PM; Ar39 bk val,er = @ 10/21/19 12:47 PM; Av…	B:24 DS	ALLLLLAAAAAA	1	Pychron Script	1	Fusions CO2	3	0	0	0	0	30	30	159			0	0.103859	0.0076706	1887.64	0.412845	35.6798	0.0846766	0.614794	0.0602031	0.176295	0.0511637	0.0564154	0.002795	0.129155	0.0073544	1888.52	0.412776	35.7302	0.0843857	0.620701
67058-155	K17-133.5	37	2019-10-20	16.65	3654434000	Heizler, M	DetritalSanidine	24	Heizler01192		localhost	7.875	Ar41 = A, deleting t<30 @ 10/21/19 12:42 PM; Ar40 = L @ 10/21/19 12:42 PM; Ar39 = L @ 10/21/19 12:42 PM; Ar38 = L @ 10/21/19 12:42 PM; Ar37 = L @ 10/21/19 12:42 PM; Ar36 = L @ 10/21/19 12:42 PM; Ar41 bk val,er = @ 10/21/19 12:47 PM; Average background @ 10/21/19 12:47 PM; Ar40 bk val,er = @ 10/21/19 12:47 PM; Line-segment interpolation @ 10/21/19 12:47 PM; Ar39 bk val,er = @ 10/21/19 12:47 PM; Av…	B:24 DS	ALLLLLAAAAAA	1	Pychron Script	1	Fusions CO2	3	0	0	0	0	30	30	161			0	0.0301205	0.0032522	607.956	0.0484082	59.6985	0.0235552	0.737931	0.0057618	0.132989	0.0139281	0.0261172	0.0005154	0.0554161	0.0024139	608.842	0.0478494	59.7489	0.0224869	0.743838
67058-156	K17-133.5	37	2019-10-20	16.7667	3654435000	Heizler, M	DetritalSanidine	24	Heizler01192		localhost	7.875	Ar41 = A, deleting t<30 @ 10/21/19 12:42 PM; Ar40 = L @ 10/21/19 12:42 PM; Ar39 = L @ 10/21/19 12:42 PM; Ar38 = L @ 10/21/19 12:42 PM; Ar37 = L @ 10/21/19 12:42 PM; Ar36 = L @ 10/21/19 12:42 PM; Ar41 bk val,er = @ 10/21/19 12:47 PM; Average background @ 10/21/19 12:47 PM; Ar40 bk val,er = @ 10/21/19 12:47 PM; Line-segment interpolation @ 10/21/19 12:47 PM; Ar39 bk val,er = @ 10/21/19 12:47 PM; Av…	B:24 DS	ALLLLLAAAAAA	1	Pychron Script	1	Fusions CO2	3	0	0	0	0	30	30	162			0	0.0340081	0.0035995	507.31	0.0443387	66.9356	0.0236131	0.82478	0.0069896	0.181405	0.0143389	0.0391486	0.0006826	0.0593038	0.0028647	508.199	0.0437193	66.986	0.0225477	0.830687
67058-157	K17-133.5	37	2019-10-20	16.8833	3654435000	Heizler, M	DetritalSanidine	24	Heizler01192		localhost	7.875	Ar41 = A, deleting t<30 @ 10/21/19 12:42 PM; Ar40 = L @ 10/21/19 12:42 PM; Ar39 = L @ 10/21/19 12:42 PM; Ar38 = L @ 10/21/19 12:42 PM; Ar37 = L @ 10/21/19 12:42 PM; Ar36 = L @ 10/21/19 12:42 PM; Ar41 bk val,er = @ 10/21/19 12:47 PM; Average background @ 10/21/19 12:47 PM; Ar40 bk val,er = @ 10/21/19 12:47 PM; Line-segment interpolation @ 10/21/19 12:47 PM; Ar39 bk val,er = @ 10/21/19 12:47 PM; Av…	B:24 DS	ALLLLLAAAAAA	1	Pychron Script	1	Fusions CO2	3	0	0	0	0	30	30	163			0	0.031759	0.0034735	154.377	0.0257753	16.2159	0.0162813	0.204137	0.0069105	0.0730939	0.0123714	0.0146119	0.0004377	0.0570546	0.0027046	155.27	0.024658	16.2663	0.0146934	0.210044
67058-158	K17-133.5	37	2019-10-20	17.1333	3654436000	Heizler, M	DetritalSanidine	24	Heizler01192		localhost	7.875	Ar41 = A, deleting t<30 @ 10/21/19 12:42 PM; Ar40 = L @ 10/21/19 12:42 PM; Ar39 = L @ 10/21/19 12:42 PM; Ar38 = L @ 10/21/19 12:42 PM; Ar37 = L @ 10/21/19 12:42 PM; Ar36 = L @ 10/21/19 12:42 PM; Ar41 bk val,er = @ 10/21/19 12:47 PM; Average background @ 10/21/19 12:47 PM; Ar40 bk val,er = @ 10/21/19 12:47 PM; Line-segment interpolation @ 10/21/19 12:47 PM; Ar39 bk val,er = @ 10/21/19 12:47 PM; Av…	B:24 DS	ALLLLLAAAAAA	1	Pychron Script	1	Fusions CO2	3	0	0	0	0	30	30	164			0	0.0264213	0.0035122	510.657	0.0402955	40.449	0.0197819	0.506809	0.0068945	0.0913195	0.0143213	0.0646903	0.0007787	0.051717	0.0027542	511.557	0.0395	40.4994	0.018497	0.512715
67058-159	K17-133.5	37	2019-10-20	17.2	3654436000	Heizler, M	DetritalSanidine	24	Heizler01192		localhost	7.875	Ar41 = A, deleting t<30 @ 10/21/19 12:42 PM; Ar40 = L @ 10/21/19 12:42 PM; Ar39 = L @ 10/21/19 12:42 PM; Ar38 = L @ 10/21/19 12:42 PM; Ar37 = L @ 10/21/19 12:42 PM; Ar36 = L @ 10/21/19 12:42 PM; Ar41 bk val,er = @ 10/21/19 12:47 PM; Average background @ 10/21/19 12:47 PM; Ar40 bk val,er = @ 10/21/19 12:47 PM; Line-segment interpolation @ 10/21/19 12:47 PM; Ar39 bk val,er = @ 10/21/19 12:47 PM; Av…	B:24 DS	ALLLLLAAAAAA	1	Pychron Script	1	Fusions CO2	3	0	0	0	0	30	30	165			0	0.107194	0.0085111	2153.28	0.456669	38.5879	0.0733059	0.555469	0.0263804	0.18734	0.0487288	0.0352682	0.0027395	0.13249	0.0082273	2154.18	0.456596	38.6383	0.0729697	0.561376
67058-160	K17-133.5	37	2019-10-20	17.3	3654437000	Heizler, M	DetritalSanidine	24	Heizler01192		localhost	7.875	Ar41 = A, deleting t<30 @ 10/21/19 12:42 PM; Ar40 = L @ 10/21/19 12:42 PM; Ar39 = L @ 10/21/19 12:42 PM; Ar38 = L @ 10/21/19 12:42 PM; Ar37 = L @ 10/21/19 12:42 PM; Ar36 = L @ 10/21/19 12:42 PM; Ar41 bk val,er = @ 10/21/19 12:47 PM; Average background @ 10/21/19 12:47 PM; Ar40 bk val,er = @ 10/21/19 12:47 PM; Line-segment interpolation @ 10/21/19 12:47 PM; Ar39 bk val,er = @ 10/21/19 12:47 PM; Av…	B:24 DS	ALLLLLAAAAAA	1	Pychron Script	1	Fusions CO2	3	0	0	0	0	30	30	166			0	0.0647354	0.0051862	533.132	0.0918894	34.9057	0.036527	0.459253	0.0133897	0.0735375	0.019047	0.0201521	0.0008422	0.0900311	0.004706	534.037	0.0915012	34.9561	0.0358475	0.46516
67058-161	K17-133.5	37	2019-10-20	17.3667	3654437000	Heizler, M	DetritalSanidine	24	Heizler01192		localhost	7.875	Ar41 = A, deleting t<30 @ 10/21/19 12:42 PM; Ar40 = L @ 10/21/19 12:42 PM; Ar39 = L @ 10/21/19 12:42 PM; Ar38 = L @ 10/21/19 12:42 PM; Ar37 = L @ 10/21/19 12:42 PM; Ar36 = L @ 10/21/19 12:42 PM; Ar41 bk val,er = @ 10/21/19 12:47 PM; Average background @ 10/21/19 12:47 PM; Ar40 bk val,er = @ 10/21/19 12:47 PM; Line-segment interpolation @ 10/21/19 12:47 PM; Ar39 bk val,er = @ 10/21/19 12:47 PM; Av…	B:24 DS	ALLLLLAAAAAA	1	Pychron Script	1	Fusions CO2	3	0	0	0	0	30	30	167			0	0.100715	0.007577	1547.51	0.49703	30.2518	0.0862524	0.540597	0.0386564	0.0913967	0.0456949	0.0259887	0.0019345	0.126011	0.0072567	1548.42	0.496954	30.3022	0.0859668	0.546504
67058-162	K17-133.5	37	2019-10-20	17.4833	3654437000	Heizler, M	DetritalSanidine	24	Heizler01192		localhost	7.875	Ar41 = A, deleting t<30 @ 10/21/19 12:43 PM; Ar40 = L @ 10/21/19 12:43 PM; Ar39 = L @ 10/21/19 12:43 PM; Ar38 = L @ 10/21/19 12:43 PM; Ar37 = L @ 10/21/19 12:43 PM; Ar36 = L @ 10/21/19 12:43 PM; Ar41 bk val,er = @ 10/21/19 12:47 PM; Average background @ 10/21/19 12:47 PM; Ar40 bk val,er = @ 10/21/19 12:47 PM; Line-segment interpolation @ 10/21/19 12:47 PM; Ar39 bk val,er = @ 10/21/19 12:47 PM; Av…	B:24 DS	ALLLLLAAAAAA	1	Pychron Script	1	Fusions CO2	3	0	0	0	0	30	30	168			0	0.0323104	0.0036346	191.809	0.0289575	25.0653	0.0225033	0.315791	0.006946	0.0453193	0.0118336	0.0230551	0.0005164	0.0576061	0.0029087	192.72	0.0274974	25.1157	0.0213826	0.321698
67058-163	K17-133.5	37	2019-10-20	17.6	3654438000	Heizler, M	DetritalSanidine	24	Heizler01192		localhost	7.875	Ar41 = A, deleting t<30 @ 10/21/19 12:43 PM; Ar40 = L @ 10/21/19 12:43 PM; Ar39 = L @ 10/21/19 12:43 PM; Ar38 = L @ 10/21/19 12:43 PM; Ar37 = L @ 10/21/19 12:43 PM; Ar36 = L @ 10/21/19 12:43 PM; Ar41 bk val,er = @ 10/21/19 12:47 PM; Average background @ 10/21/19 12:47 PM; Ar40 bk val,er = @ 10/21/19 12:47 PM; Line-segment interpolation @ 10/21/19 12:47 PM; Ar39 bk val,er = @ 10/21/19 12:47 PM; Av…	B:24 DS	ALLLLLAAAAAA	1	Pychron Script	1	Fusions CO2	3	0	0	0	0	30	30	169			0	0.0263871	0.0033333	59.2654	0.0211664	5.97565	0.0146745	0.0917416	0.0073357	0.0394679	0.0121003	0.0096542	0.0004497	0.0516828	0.002522	60.179	0.018904	6.02605	0.0128902	0.0976484
67058-164	K17-133.5	37	2019-10-20	17.8167	3654439000	Heizler, M	DetritalSanidine	24	Heizler01192		localhost	7.875	Ar41 = A, deleting t<30 @ 10/21/19 12:43 PM; Ar40 = L @ 10/21/19 12:43 PM; Ar39 = L @ 10/21/19 12:43 PM; Ar38 = L @ 10/21/19 12:43 PM; Ar37 = L @ 10/21/19 12:43 PM; Ar36 = L @ 10/21/19 12:43 PM; Ar41 bk val,er = @ 10/21/19 12:47 PM; Average background @ 10/21/19 12:47 PM; Ar40 bk val,er = @ 10/21/19 12:47 PM; Line-segment interpolation @ 10/21/19 12:47 PM; Ar39 bk val,er = @ 10/21/19 12:47 PM; Av…	B:24 DS	ALLLLLAAAAAA	1	Pychron Script	1	Fusions CO2	3	0	0	0	0	30	30	170			0	0.1834	0.0112543	4154.68	1.18478	30.7935	0.135863	0.766447	0.0883237	0.127526	0.0853051	0.481992	0.0156724	0.208696	0.0110413	4155.59	1.18474	30.8439	0.135682	0.772354
67058-165	K17-133.5	37	2019-10-20	17.9333	3654439000	Heizler, M	DetritalSanidine	24	Heizler01192		localhost	7.875	Ar41 = A, deleting t<30 @ 10/21/19 12:43 PM; Ar40 = L @ 10/21/19 12:43 PM; Ar39 = L @ 10/21/19 12:43 PM; Ar38 = L @ 10/21/19 12:43 PM; Ar37 = L @ 10/21/19 12:43 PM; Ar36 = L @ 10/21/19 12:43 PM; Ar41 bk val,er = @ 10/21/19 12:47 PM; Average background @ 10/21/19 12:47 PM; Ar40 bk val,er = @ 10/21/19 12:47 PM; Line-segment interpolation @ 10/21/19 12:47 PM; Ar39 bk val,er = @ 10/21/19 12:47 PM; Av…	B:24 DS	ALLLLLAAAAAA	1	Pychron Script	1	Fusions CO2	3	0	0	0	0	30	30	171			0	0.02739	0.0035729	211.112	0.0264896	23.625	0.0221795	0.29278	0.0065351	0.0501576	0.0130603	0.0377115	0.0006109	0.0526857	0.0028312	212.026	0.0245164	23.6754	0.0210415	0.298687
67058-166	K17-133.5	37	2019-10-20	18.0333	3654439000	Heizler, M	DetritalSanidine	24	Heizler01192		localhost	7.875	Ar41 = A, deleting t<30 @ 10/21/19 12:43 PM; Ar40 = L @ 10/21/19 12:43 PM; Ar39 = L @ 10/21/19 12:43 PM; Ar38 = L @ 10/21/19 12:43 PM; Ar37 = L @ 10/21/19 12:43 PM; Ar36 = L @ 10/21/19 12:43 PM; Ar41 bk val,er = @ 10/21/19 12:47 PM; Average background @ 10/21/19 12:47 PM; Ar40 bk val,er = @ 10/21/19 12:47 PM; Line-segment interpolation @ 10/21/19 12:47 PM; Ar39 bk val,er = @ 10/21/19 12:47 PM; Av…	B:24 DS	ALLLLLAAAAAA	1	Pychron Script	1	Fusions CO2	3	0	0	0	0	30	30	172			0	0.0509831	0.0050768	369.97	0.0678432	14.2541	0.0334994	0.235742	0.0136119	0.200082	0.020089	0.0319982	0.001044	0.0762788	0.0045852	370.882	0.0671066	14.3045	0.0327571	0.241648
67058-167	K17-133.5	37	2019-10-21	7.18333	3654487000	Heizler, M	DetritalSanidine	24	Heizler01192		localhost	7.875	Ar41 = A, deleting t<30 @ 10/21/19 12:43 PM; Ar40 = L @ 10/21/19 12:43 PM; Ar39 = L @ 10/21/19 12:43 PM; Ar38 = L @ 10/21/19 12:43 PM; Ar37 = L @ 10/21/19 12:43 PM; Ar36 = L @ 10/21/19 12:43 PM; Ar41 bk val,er = @ 10/21/19 12:47 PM; Average background @ 10/21/19 12:47 PM; Ar40 bk val,er = @ 10/21/19 12:47 PM; Line-segment interpolation @ 10/21/19 12:47 PM; Ar39 bk val,er = @ 10/21/19 12:47 PM; Av…	B:24 DS	ALLLLLAAAAAA	1	Pychron Script	1	Fusions CO2	3	0	0	0	0	30	30	174			0	0.0361837	0.0051106	302.317	0.0608654	21.2009	0.0353717	0.290492	0.0096093	0.105347	0.0217918	0.0091032	0.0006536	0.0614794	0.0046225	302.956	0.0601296	21.2513	0.0346695	0.296399
67058-168	K17-133.5	37	2019-10-21	7.31667	3654487000	Heizler, M	DetritalSanidine	24	Heizler01192		localhost	7.875	Ar41 = A, deleting t<30 @ 10/21/19 12:43 PM; Ar40 = L @ 10/21/19 12:43 PM; Ar39 = L @ 10/21/19 12:43 PM; Ar38 = L @ 10/21/19 12:43 PM; Ar37 = L @ 10/21/19 12:43 PM; Ar36 = L @ 10/21/19 12:43 PM; Ar41 bk val,er = @ 10/21/19 12:47 PM; Average background @ 10/21/19 12:47 PM; Ar40 bk val,er = @ 10/21/19 12:47 PM; Line-segment interpolation @ 10/21/19 12:47 PM; Ar39 bk val,er = @ 10/21/19 12:47 PM; Av…	B:24 DS	ALLLLLAAAAAA	1	Pychron Script	1	Fusions CO2	3	0	0	0	0	30	30	175			0	0.0183778	0.0036176	174.06	0.0262675	16.6904	0.0172412	0.211394	0.0064403	0.0701578	0.0117639	0.0106416	0.0004332	0.0436735	0.0028873	174.696	0.0244877	16.7408	0.0157504	0.2173
67058-169	K17-133.5	37	2019-10-21	8.1	3654490000	Heizler, M	DetritalSanidine	24	Heizler01192		localhost	7.875	Ar41 = A, deleting t<30 @ 10/21/19 12:43 PM; Ar40 = L @ 10/21/19 12:43 PM; Ar39 = L @ 10/21/19 12:43 PM; Ar38 = L @ 10/21/19 12:43 PM; Ar37 = L @ 10/21/19 12:43 PM; Ar36 = L @ 10/21/19 12:43 PM; Ar41 bk val,er = @ 10/21/19 12:47 PM; Average background @ 10/21/19 12:47 PM; Ar40 bk val,er = @ 10/21/19 12:47 PM; Line-segment interpolation @ 10/21/19 12:47 PM; Ar39 bk val,er = @ 10/21/19 12:47 PM; Av…	B:24 DS	ALLLLLAAAAAA	1	Pychron Script	1	Fusions CO2	3	0	0	0	0	30	30	177			0	0.120172	0.006412	2571.32	0.734234	38.1046	0.181931	0.771203	0.0621597	0.284022	0.065534	0.115577	0.0062459	0.145468	0.0060303	2571.94	0.734166	38.155	0.181796	0.77711
67058-170	K17-133.5	37	2019-10-21	8.21667	3654490000	Heizler, M	DetritalSanidine	24	Heizler01192		localhost	7.875	Ar41 = A, deleting t<30 @ 10/21/19 12:43 PM; Ar40 = L @ 10/21/19 12:43 PM; Ar39 = L @ 10/21/19 12:43 PM; Ar38 = L @ 10/21/19 12:43 PM; Ar37 = L @ 10/21/19 12:43 PM; Ar36 = L @ 10/21/19 12:43 PM; Ar41 bk val,er = @ 10/21/19 12:47 PM; Average background @ 10/21/19 12:47 PM; Ar40 bk val,er = @ 10/21/19 12:47 PM; Line-segment interpolation @ 10/21/19 12:47 PM; Ar39 bk val,er = @ 10/21/19 12:47 PM; Av…	B:24 DS	ALLLLLAAAAAA	1	Pychron Script	1	Fusions CO2	3	0	0	0	0	30	30	178			0	0.0332516	0.0035411	225.81	0.0372204	23.4933	0.0186071	0.327783	0.0069257	0.0631664	0.0132389	0.0798409	0.0008857	0.0585472	0.002791	226.427	0.0358387	23.5437	0.0172348	0.33369
67058-171	K17-133.5	37	2019-10-21	8.46667	3654491000	Heizler, M	DetritalSanidine	24	Heizler01192		localhost	7.875	Ar41 = A, deleting t<30 @ 10/21/19 12:43 PM; Ar40 = L @ 10/21/19 12:43 PM; Ar39 = L @ 10/21/19 12:43 PM; Ar38 = L @ 10/21/19 12:43 PM; Ar37 = L @ 10/21/19 12:43 PM; Ar36 = L @ 10/21/19 12:43 PM; Ar41 bk val,er = @ 10/21/19 12:47 PM; Average background @ 10/21/19 12:47 PM; Ar40 bk val,er = @ 10/21/19 12:47 PM; Line-segment interpolation @ 10/21/19 12:47 PM; Ar39 bk val,er = @ 10/21/19 12:47 PM; Av…	B:24 DS	ALLLLLAAAAAA	1	Pychron Script	1	Fusions CO2	3	0	0	0	0	30	30	179			0	0.0253346	0.0032481	108.325	0.023357	13.4501	0.0167866	0.182248	0.0073249	0.0475713	0.0133487	0.0128796	0.0003941	0.0506303	0.0024083	108.936	0.0210139	13.5005	0.0152515	0.188155
67058-172	K17-133.5	37	2019-10-21	8.56667	3654492000	Heizler, M	DetritalSanidine	24	Heizler01192		localhost	7.875	Ar41 = A, deleting t<30 @ 10/21/19 12:43 PM; Ar40 = L @ 10/21/19 12:43 PM; Ar39 = L @ 10/21/19 12:43 PM; Ar38 = L @ 10/21/19 12:43 PM; Ar37 = L @ 10/21/19 12:43 PM; Ar36 = L @ 10/21/19 12:43 PM; Ar41 bk val,er = @ 10/21/19 12:47 PM; Average background @ 10/21/19 12:47 PM; Ar40 bk val,er = @ 10/21/19 12:47 PM; Line-segment interpolation @ 10/21/19 12:47 PM; Ar39 bk val,er = @ 10/21/19 12:47 PM; Av…	B:24 DS	ALLLLLAAAAAA	1	Pychron Script	1	Fusions CO2	3	0	0	0	0	30	30	180			0	0.0336686	0.0041639	115.641	0.0448345	7.89399	0.0258087	0.135922	0.0134941	0.0681359	0.0212804	0.0181411	0.0007431	0.0589643	0.003548	116.251	0.0436439	7.94439	0.0248376	0.141829
67058-173	K17-133.5	37	2019-10-21	8.66667	3654492000	Heizler, M	DetritalSanidine	24	Heizler01192		localhost	7.875	Ar41 = A, deleting t<30 @ 10/21/19 12:43 PM; Ar40 = L @ 10/21/19 12:43 PM; Ar39 = L @ 10/21/19 12:43 PM; Ar38 = L @ 10/21/19 12:43 PM; Ar37 = L @ 10/21/19 12:43 PM; Ar36 = L @ 10/21/19 12:43 PM; Ar41 bk val,er = @ 10/21/19 12:47 PM; Average background @ 10/21/19 12:47 PM; Ar40 bk val,er = @ 10/21/19 12:47 PM; Line-segment interpolation @ 10/21/19 12:47 PM; Ar39 bk val,er = @ 10/21/19 12:47 PM; Av…	B:24 DS	ALLLLLAAAAAA	1	Pychron Script	1	Fusions CO2	3	0	0	0	0	30	30	181			0	0.0212931	0.0047318	517.879	0.0692967	1.21359	0.0201127	0.0549841	0.0089295	0.033924	0.0169059	0.0009984	0.0003698	0.0465887	0.0042	518.486	0.0685233	1.26399	0.0188504	0.0608909
67058-174	K17-133.5	37	2019-10-21	8.78333	3654492000	Heizler, M	DetritalSanidine	24	Heizler01192		localhost	7.875	Ar41 = A, deleting t<30 @ 10/21/19 12:43 PM; Ar40 = L @ 10/21/19 12:43 PM; Ar39 = L @ 10/21/19 12:43 PM; Ar38 = L @ 10/21/19 12:43 PM; Ar37 = L @ 10/21/19 12:43 PM; Ar36 = L @ 10/21/19 12:43 PM; Ar41 bk val,er = @ 10/21/19 12:47 PM; Average background @ 10/21/19 12:47 PM; Ar40 bk val,er = @ 10/21/19 12:47 PM; Line-segment interpolation @ 10/21/19 12:47 PM; Ar39 bk val,er = @ 10/21/19 12:47 PM; Av…	B:24 DS	ALLLLLAAAAAA	1	Pychron Script	1	Fusions CO2	3	0	0	0	0	30	30	182			0	0.030957	0.0034408	278.936	0.0329211	29.4596	0.0195376	0.373549	0.0061169	0.122858	0.011844	0.020184	0.0004759	0.0562526	0.0026625	279.541	0.0312351	29.51	0.0182355	0.379455
67058-175	K17-133.5	37	2019-10-21	8.91667	3654493000	Heizler, M	DetritalSanidine	24	Heizler01192		localhost	7.875	Ar41 = A, deleting t<30 @ 10/21/19 12:43 PM; Ar40 = L @ 10/21/19 12:43 PM; Ar39 = L @ 10/21/19 12:43 PM; Ar38 = L @ 10/21/19 12:43 PM; Ar37 = L @ 10/21/19 12:43 PM; Ar36 = L @ 10/21/19 12:43 PM; Ar41 bk val,er = @ 10/21/19 12:47 PM; Average background @ 10/21/19 12:47 PM; Ar40 bk val,er = @ 10/21/19 12:47 PM; Line-segment interpolation @ 10/21/19 12:47 PM; Ar39 bk val,er = @ 10/21/19 12:47 PM; Av…	B:24 DS	ALLLLLAAAAAA	1	Pychron Script	1	Fusions CO2	3	0	0	0	0	30	30	183			0	0.024198	0.0032309	162.884	0.0276942	22.5341	0.0188427	0.289971	0.0069853	0.093325	0.0134652	0.0166383	0.0004918	0.0494936	0.0023851	163.486	0.0256324	22.5845	0.0174889	0.295878
67058-176	K17-133.5	37	2019-10-21	9.35	3654494000	Heizler, M	DetritalSanidine	24	Heizler01192		localhost	7.875	Ar41 = A, deleting t<30 @ 10/21/19 12:43 PM; Ar40 = L @ 10/21/19 12:43 PM; Ar39 = L @ 10/21/19 12:43 PM; Ar38 = L @ 10/21/19 12:43 PM; Ar37 = L @ 10/21/19 12:43 PM; Ar36 = L @ 10/21/19 12:43 PM; Ar41 bk val,er = @ 10/21/19 12:47 PM; Average background @ 10/21/19 12:47 PM; Ar40 bk val,er = @ 10/21/19 12:47 PM; Line-segment interpolation @ 10/21/19 12:47 PM; Ar39 bk val,er = @ 10/21/19 12:47 PM; Av…	B:24 DS	ALLLLLAAAAAA	1	Pychron Script	1	Fusions CO2	3	0	0	0	0	30	30	184			0	0.0256888	0.0034654	72.0331	0.0221826	12.1089	0.018152	0.157946	0.007053	0.119083	0.0133442	0.0265311	0.0005585	0.0509844	0.0026942	72.6264	0.0193901	12.1593	0.0167425	0.163853
67058-177	K17-133.5	37	2019-10-21	9.46667	3654495000	Heizler, M	DetritalSanidine	24	Heizler01192		localhost	7.875	Ar41 = A, deleting t<30 @ 10/21/19 12:43 PM; Ar40 = L @ 10/21/19 12:43 PM; Ar39 = L @ 10/21/19 12:43 PM; Ar38 = L @ 10/21/19 12:43 PM; Ar37 = L @ 10/21/19 12:43 PM; Ar36 = L @ 10/21/19 12:43 PM; Ar41 bk val,er = @ 10/21/19 12:47 PM; Average background @ 10/21/19 12:47 PM; Ar40 bk val,er = @ 10/21/19 12:47 PM; Line-segment interpolation @ 10/21/19 12:47 PM; Ar39 bk val,er = @ 10/21/19 12:47 PM; Av…	B:24 DS	ALLLLLAAAAAA	1	Pychron Script	1	Fusions CO2	3	0	0	0	0	30	30	185			0	0.0299077	0.0033375	80.03	0.0221811	9.01742	0.0160432	0.127109	0.0078623	0.0465443	0.0134802	0.003752	0.0003369	0.0552034	0.0025276	80.621	0.0193467	9.06782	0.0144291	0.133016
67058-178	K17-133.5	37	2019-10-21	9.56667	3654495000	Heizler, M	DetritalSanidine	24	Heizler01192		localhost	7.875	Ar41 = A, deleting t<30 @ 10/21/19 12:43 PM; Ar40 = L @ 10/21/19 12:43 PM; Ar39 = L @ 10/21/19 12:43 PM; Ar38 = L @ 10/21/19 12:43 PM; Ar37 = L @ 10/21/19 12:43 PM; Ar36 = L @ 10/21/19 12:43 PM; Ar41 bk val,er = @ 10/21/19 12:47 PM; Average background @ 10/21/19 12:47 PM; Ar40 bk val,er = @ 10/21/19 12:47 PM; Line-segment interpolation @ 10/21/19 12:47 PM; Ar39 bk val,er = @ 10/21/19 12:47 PM; Av…	B:24 DS	ALLLLLAAAAAA	1	Pychron Script	1	Fusions CO2	3	0	0	0	0	30	30	186			0	0.0303164	0.0037013	249.374	0.0370602	26.8632	0.0198518	0.337649	0.0066661	0.277248	0.0122692	0.0231296	0.0005105	0.0556121	0.0029915	249.963	0.0354128	26.9136	0.0185717	0.343556
67058-179	K17-133.5	37	2019-10-21	9.76667	3654496000	Heizler, M	DetritalSanidine	24	Heizler01192		localhost	7.875	Ar41 = A, deleting t<30 @ 10/21/19 12:44 PM; Ar40 = P @ 10/21/19 12:44 PM; Ar39 = P @ 10/21/19 12:44 PM; Ar38 = L @ 10/21/19 12:44 PM; Ar37 = L @ 10/21/19 12:44 PM; Ar36 = P @ 10/21/19 12:44 PM; Ar41 bk val,er = @ 10/21/19 12:47 PM; Average background @ 10/21/19 12:47 PM; Ar40 bk val,er = @ 10/21/19 12:47 PM; Line-segment interpolation @ 10/21/19 12:47 PM; Ar39 bk val,er = @ 10/21/19 12:47 PM; Av…	B:24 DS	APPLLPAAAAAA	1	Pychron Script	1	Fusions CO2	3	0	0	0	0	30	30	187			0	0.0145869	0.0024801	5.06067	0.0144988	12.1496	0.0136075	0.15783	0.0034977	0.066135	0.0066385	0.0092236	0.0003263	0.0398825	0.0011836	5.64515	0.0093734	12.2	0.011661	0.163737
67058-180	K17-133.5	37	2019-10-21	10.0167	3654497000	Heizler, M	DetritalSanidine	24	Heizler01192		localhost	7.875	Ar41 = A, deleting t<30 @ 10/21/19 12:43 PM; Ar40 = L @ 10/21/19 12:43 PM; Ar39 = L @ 10/21/19 12:43 PM; Ar38 = L @ 10/21/19 12:43 PM; Ar37 = L @ 10/21/19 12:43 PM; Ar36 = L @ 10/21/19 12:43 PM; Ar41 bk val,er = @ 10/21/19 12:47 PM; Average background @ 10/21/19 12:47 PM; Ar40 bk val,er = @ 10/21/19 12:47 PM; Line-segment interpolation @ 10/21/19 12:47 PM; Ar39 bk val,er = @ 10/21/19 12:47 PM; Av…	B:24 DS	ALLLLLAAAAAA	1	Pychron Script	1	Fusions CO2	3	0	0	0	0	30	30	188			0	0.0546925	0.0053536	397.604	0.058385	23.7382	0.0289956	0.310513	0.0121998	0.0882691	0.0186043	0.0084224	0.0006823	0.0799881	0.0048899	398.201	0.0573911	23.7886	0.0281347	0.316419
67058-182	K17-133.5	37	2019-10-21	10.2667	3654498000	Heizler, M	DetritalSanidine	24	Heizler01192		localhost	7.875	Ar41 = A, deleting t<30 @ 10/21/19 12:43 PM; Ar40 = L @ 10/21/19 12:43 PM; Ar39 = L @ 10/21/19 12:43 PM; Ar38 = L @ 10/21/19 12:43 PM; Ar37 = L @ 10/21/19 12:43 PM; Ar36 = L @ 10/21/19 12:43 PM; Ar41 bk val,er = @ 10/21/19 12:47 PM; Average background @ 10/21/19 12:47 PM; Ar40 bk val,er = @ 10/21/19 12:47 PM; Line-segment interpolation @ 10/21/19 12:47 PM; Ar39 bk val,er = @ 10/21/19 12:47 PM; Av…	B:24 DS	ALLLLLAAAAAA	1	Pychron Script	1	Fusions CO2	3	0	0	0	0	30	30	190			0	0.0453007	0.0041523	407.303	0.0702886	27.7929	0.027994	0.374071	0.0140458	0.460022	0.0196938	0.046955	0.0009419	0.0705964	0.0035343	407.944	0.069638	27.8433	0.0271012	0.379978
67058-183	K17-133.5	37	2019-10-21	10.3667	3654498000	Heizler, M	DetritalSanidine	24	Heizler01192		localhost	7.875	Ar41 = A, deleting t<30 @ 10/21/19 12:43 PM; Ar40 = L @ 10/21/19 12:43 PM; Ar39 = L @ 10/21/19 12:43 PM; Ar38 = L @ 10/21/19 12:43 PM; Ar37 = L @ 10/21/19 12:43 PM; Ar36 = L @ 10/21/19 12:43 PM; Ar41 bk val,er = @ 10/21/19 12:47 PM; Average background @ 10/21/19 12:47 PM; Ar40 bk val,er = @ 10/21/19 12:47 PM; Line-segment interpolation @ 10/21/19 12:47 PM; Ar39 bk val,er = @ 10/21/19 12:47 PM; Av…	B:24 DS	ALLLLLAAAAAA	1	Pychron Script	1	Fusions CO2	3	0	0	0	0	30	30	191			0	0.0535046	0.0046125	1120.02	0.123192	22.5781	0.0283255	0.298132	0.0105987	0.108888	0.0173152	0.0265947	0.0008858	0.0788002	0.0040651	1120.67	0.122853	22.6285	0.0274436	0.304039
67058-185	K17-133.5	37	2019-10-21	10.65	3654499000	Heizler, M	DetritalSanidine	24	Heizler01192		localhost	7.875	Ar41 = A, deleting t<30 @ 10/21/19 12:43 PM; Ar40 = L @ 10/21/19 12:43 PM; Ar39 = L @ 10/21/19 12:43 PM; Ar38 = L @ 10/21/19 12:43 PM; Ar37 = L @ 10/21/19 12:43 PM; Ar36 = L @ 10/21/19 12:43 PM; Ar41 bk val,er = @ 10/21/19 12:47 PM; Average background @ 10/21/19 12:47 PM; Ar40 bk val,er = @ 10/21/19 12:47 PM; Line-segment interpolation @ 10/21/19 12:47 PM; Ar39 bk val,er = @ 10/21/19 12:47 PM; Av…	B:24 DS	ALLLLLAAAAAA	1	Pychron Script	1	Fusions CO2	3	0	0	0	0	30	30	193			0	0.0283884	0.0035872	57.0437	0.0182136	6.32643	0.0168582	0.0837587	0.0069997	0.0148806	0.0117774	0.0091067	0.0003808	0.053684	0.0028491	57.7482	0.016245	6.37683	0.0153302	0.0896655
67058-186	K17-133.5	37	2019-10-21	10.8833	3654500000	Heizler, M	DetritalSanidine	24	Heizler01192		localhost	7.875	Ar41 = A, deleting t<30 @ 10/21/19 12:43 PM; Ar40 = L @ 10/21/19 12:43 PM; Ar39 = L @ 10/21/19 12:43 PM; Ar38 = L @ 10/21/19 12:43 PM; Ar37 = L @ 10/21/19 12:43 PM; Ar36 = L @ 10/21/19 12:43 PM; Ar41 bk val,er = @ 10/21/19 12:47 PM; Average background @ 10/21/19 12:47 PM; Ar40 bk val,er = @ 10/21/19 12:47 PM; Line-segment interpolation @ 10/21/19 12:47 PM; Ar39 bk val,er = @ 10/21/19 12:47 PM; Av…	B:24 DS	ALLLLLAAAAAA	1	Pychron Script	1	Fusions CO2	3	0	0	0	0	30	30	194			0	0.0261851	0.0030901	162.553	0.0264298	20.3625	0.0166411	0.246944	0.0072177	0.0611475	0.0117858	0.0128129	0.0004677	0.0514808	0.0021906	163.298	0.0252696	20.4129	0.0150911	0.252851
67058-187	K17-133.5	37	2019-10-21	11.0167	3654500000	Heizler, M	DetritalSanidine	24	Heizler01192		localhost	7.875	Ar41 = A, deleting t<30 @ 10/21/19 12:43 PM; Ar40 = L @ 10/21/19 12:43 PM; Ar39 = L @ 10/21/19 12:43 PM; Ar38 = L @ 10/21/19 12:43 PM; Ar37 = L @ 10/21/19 12:43 PM; Ar36 = L @ 10/21/19 12:43 PM; Ar41 bk val,er = @ 10/21/19 12:47 PM; Average background @ 10/21/19 12:47 PM; Ar40 bk val,er = @ 10/21/19 12:47 PM; Line-segment interpolation @ 10/21/19 12:47 PM; Ar39 bk val,er = @ 10/21/19 12:47 PM; Av…	B:24 DS	ALLLLLAAAAAA	1	Pychron Script	1	Fusions CO2	3	0	0	0	0	30	30	195			0	0.0281003	0.0035295	167.96	0.0268292	19.9259	0.0198148	0.270659	0.0073443	0.143717	0.0127655	0.0124253	0.0003987	0.053396	0.0027762	168.727	0.0257225	19.9763	0.0185322	0.276566
67058-188	K17-133.5	37	2019-10-21	11.1167	3654501000	Heizler, M	DetritalSanidine	24	Heizler01192		localhost	7.875	Ar41 = A, deleting t<30 @ 10/21/19 12:43 PM; Ar40 = L @ 10/21/19 12:43 PM; Ar39 = L @ 10/21/19 12:43 PM; Ar38 = L @ 10/21/19 12:43 PM; Ar37 = L @ 10/21/19 12:43 PM; Ar36 = L @ 10/21/19 12:43 PM; Ar41 bk val,er = @ 10/21/19 12:47 PM; Average background @ 10/21/19 12:47 PM; Ar40 bk val,er = @ 10/21/19 12:47 PM; Line-segment interpolation @ 10/21/19 12:47 PM; Ar39 bk val,er = @ 10/21/19 12:47 PM; Av…	B:24 DS	ALLLLLAAAAAA	1	Pychron Script	1	Fusions CO2	3	0	0	0	0	30	30	196			0	0.02617	0.0033371	174.499	0.0301825	21.4754	0.0174149	0.280152	0.0059353	0.0986138	0.0119234	0.0177768	0.0004268	0.0514656	0.0025271	175.284	0.0292107	21.5258	0.0159403	0.286058
67058-189	K17-133.5	37	2019-10-21	11.2167	3654501000	Heizler, M	DetritalSanidine	24	Heizler01192		localhost	7.875	Ar41 = A, deleting t<30 @ 10/21/19 12:43 PM; Ar40 = L @ 10/21/19 12:43 PM; Ar39 = L @ 10/21/19 12:43 PM; Ar38 = L @ 10/21/19 12:43 PM; Ar37 = L @ 10/21/19 12:43 PM; Ar36 = L @ 10/21/19 12:43 PM; Ar41 bk val,er = @ 10/21/19 12:47 PM; Average background @ 10/21/19 12:47 PM; Ar40 bk val,er = @ 10/21/19 12:47 PM; Line-segment interpolation @ 10/21/19 12:47 PM; Ar39 bk val,er = @ 10/21/19 12:47 PM; Av…	B:24 DS	ALLLLLAAAAAA	1	Pychron Script	1	Fusions CO2	3	0	0	0	0	30	30	197			0	0.0531696	0.004095	131.149	0.0411336	9.06224	0.0328567	0.133724	0.0120147	0.0486104	0.0217227	0.0308775	0.0009724	0.0784652	0.0034668	131.951	0.0404187	9.11264	0.0320995	0.139631
67058-190	K17-133.5	37	2019-10-21	11.3333	3654502000	Heizler, M	DetritalSanidine	24	Heizler01192		localhost	7.875	Ar41 = A, deleting t<30 @ 10/21/19 12:43 PM; Ar40 = L @ 10/21/19 12:43 PM; Ar39 = L @ 10/21/19 12:43 PM; Ar38 = L @ 10/21/19 12:43 PM; Ar37 = L @ 10/21/19 12:43 PM; Ar36 = L @ 10/21/19 12:43 PM; Ar41 bk val,er = @ 10/21/19 12:47 PM; Average background @ 10/21/19 12:47 PM; Ar40 bk val,er = @ 10/21/19 12:47 PM; Line-segment interpolation @ 10/21/19 12:47 PM; Ar39 bk val,er = @ 10/21/19 12:47 PM; Av…	B:24 DS	ALLLLLAAAAAA	1	Pychron Script	1	Fusions CO2	3	0	0	0	0	30	30	198			0	0.0391487	0.0034861	155.368	0.0239899	16.3574	0.0183896	0.217751	0.0072672	0.0348809	0.0135791	0.0343464	0.0005836	0.0644444	0.0027208	156.189	0.0227028	16.4078	0.0169998	0.223658
67058-191	K17-133.5	37	2019-10-21	11.4	3654502000	Heizler, M	DetritalSanidine	24	Heizler01192		localhost	7.875	Ar41 = A, deleting t<30 @ 10/21/19 12:43 PM; Ar40 = L @ 10/21/19 12:43 PM; Ar39 = L @ 10/21/19 12:43 PM; Ar38 = L @ 10/21/19 12:43 PM; Ar37 = L @ 10/21/19 12:43 PM; Ar36 = L @ 10/21/19 12:43 PM; Ar41 bk val,er = @ 10/21/19 12:47 PM; Average background @ 10/21/19 12:47 PM; Ar40 bk val,er = @ 10/21/19 12:47 PM; Line-segment interpolation @ 10/21/19 12:47 PM; Ar39 bk val,er = @ 10/21/19 12:47 PM; Av…	B:24 DS	ALLLLLAAAAAA	1	Pychron Script	1	Fusions CO2	3	0	0	0	0	30	30	199			0	0.150852	0.0104177	2786.5	1.12853	47.4927	0.184855	0.918568	0.107678	0.22454	0.0795458	0.0287576	0.003602	0.176148	0.0101871	2787.34	1.1285	47.5431	0.184721	0.924475
67058-192	K17-133.5	37	2019-10-21	11.5	3654502000	Heizler, M	DetritalSanidine	24	Heizler01192		localhost	7.875	Ar41 = A, deleting t<30 @ 10/21/19 12:43 PM; Ar40 = L @ 10/21/19 12:43 PM; Ar39 = L @ 10/21/19 12:43 PM; Ar38 = L @ 10/21/19 12:43 PM; Ar37 = L @ 10/21/19 12:43 PM; Ar36 = L @ 10/21/19 12:43 PM; Ar41 bk val,er = @ 10/21/19 12:47 PM; Average background @ 10/21/19 12:47 PM; Ar40 bk val,er = @ 10/21/19 12:47 PM; Line-segment interpolation @ 10/21/19 12:47 PM; Ar39 bk val,er = @ 10/21/19 12:47 PM; Av…	B:24 DS	ALLLLLAAAAAA	1	Pychron Script	1	Fusions CO2	3	0	0	0	0	30	30	200			0	0.0460521	0.0051543	301.324	0.0611613	19.3312	0.0335714	0.275129	0.0118462	0.0600457	0.0202678	0.0350865	0.0009846	0.0713478	0.0046708	302.174	0.060628	19.3816	0.0328307	0.281036
67058-193	K17-133.5	37	2019-10-21	11.5667	3654502000	Heizler, M	DetritalSanidine	24	Heizler01192		localhost	7.875	Ar41 = A, deleting t<30 @ 10/21/19 12:43 PM; Ar40 = L @ 10/21/19 12:43 PM; Ar39 = L @ 10/21/19 12:43 PM; Ar38 = L @ 10/21/19 12:43 PM; Ar37 = L @ 10/21/19 12:43 PM; Ar36 = L @ 10/21/19 12:43 PM; Ar41 bk val,er = @ 10/21/19 12:47 PM; Average background @ 10/21/19 12:47 PM; Ar40 bk val,er = @ 10/21/19 12:47 PM; Line-segment interpolation @ 10/21/19 12:47 PM; Ar39 bk val,er = @ 10/21/19 12:47 PM; Av…	B:24 DS	ALLLLLAAAAAA	1	Pychron Script	1	Fusions CO2	3	0	0	0	0	30	30	201			0	0.161208	0.0095969	2685.71	0.943877	48.6859	0.0991803	0.947561	0.0676168	0.161492	0.126027	0.166883	0.0064757	0.186503	0.0093462	2686.57	0.943841	48.7362	0.098932	0.953468
67058-194	K17-133.5	37	2019-10-21	11.6667	3654503000	Heizler, M	DetritalSanidine	24	Heizler01192		localhost	7.875	Ar41 = A, deleting t<30 @ 10/21/19 12:43 PM; Ar40 = L @ 10/21/19 12:43 PM; Ar39 = L @ 10/21/19 12:43 PM; Ar38 = L @ 10/21/19 12:43 PM; Ar37 = L @ 10/21/19 12:43 PM; Ar36 = L @ 10/21/19 12:43 PM; Ar41 bk val,er = @ 10/21/19 12:47 PM; Average background @ 10/21/19 12:47 PM; Ar40 bk val,er = @ 10/21/19 12:47 PM; Line-segment interpolation @ 10/21/19 12:47 PM; Ar39 bk val,er = @ 10/21/19 12:47 PM; Av…	B:24 DS	ALLLLLAAAAAA	1	Pychron Script	1	Fusions CO2	3	0	0	0	0	30	30	202			0	0.0653551	0.0046458	1151.31	0.117894	17.6163	0.0250165	0.263934	0.0153453	0.0917399	0.0200765	0.0091955	0.00074	0.0906507	0.0041028	1152.19	0.117586	17.6667	0.0240134	0.269841
67058-195	K17-133.5	37	2019-10-21	11.7833	3654503000	Heizler, M	DetritalSanidine	24	Heizler01192		localhost	7.875	Ar41 = A, deleting t<30 @ 10/21/19 12:43 PM; Ar40 = L @ 10/21/19 12:43 PM; Ar39 = L @ 10/21/19 12:43 PM; Ar38 = L @ 10/21/19 12:43 PM; Ar37 = L @ 10/21/19 12:43 PM; Ar36 = L @ 10/21/19 12:43 PM; Ar41 bk val,er = @ 10/21/19 12:47 PM; Average background @ 10/21/19 12:47 PM; Ar40 bk val,er = @ 10/21/19 12:47 PM; Line-segment interpolation @ 10/21/19 12:47 PM; Ar39 bk val,er = @ 10/21/19 12:47 PM; Av…	B:24 DS	ALLLLLAAAAAA	1	Pychron Script	1	Fusions CO2	3	0	0	0	0	30	30	203			0	0.0298972	0.0034267	243.974	0.0336331	29.1019	0.0192076	0.367661	0.0071315	0.227842	0.0117398	0.0082852	0.0003931	0.0551929	0.0026443	244.871	0.032434	29.1523	0.0178815	0.373568
67058-196	K17-133.5	37	2019-10-21	11.8667	3654504000	Heizler, M	DetritalSanidine	24	Heizler01192		localhost	7.875	Ar41 = A, deleting t<30 @ 10/21/19 12:43 PM; Ar40 = L @ 10/21/19 12:43 PM; Ar39 = L @ 10/21/19 12:43 PM; Ar38 = L @ 10/21/19 12:43 PM; Ar37 = L @ 10/21/19 12:43 PM; Ar36 = L @ 10/21/19 12:43 PM; Ar41 bk val,er = @ 10/21/19 12:47 PM; Average background @ 10/21/19 12:47 PM; Ar40 bk val,er = @ 10/21/19 12:47 PM; Line-segment interpolation @ 10/21/19 12:47 PM; Ar39 bk val,er = @ 10/21/19 12:47 PM; Av…	B:24 DS	ALLLLLAAAAAA	1	Pychron Script	1	Fusions CO2	3	0	0	0	0	30	30	204			0	0.110439	0.0073441	1825.6	0.480943	31.6983	0.11664	0.580882	0.0385185	0.139044	0.0444334	0.239958	0.0080398	0.135735	0.0070132	1826.51	0.480855	31.7487	0.116429	0.586789
67058-197	K17-133.5	37	2019-10-21	11.9667	3654504000	Heizler, M	DetritalSanidine	24	Heizler01192		localhost	7.875	Ar41 = A, deleting t<30 @ 10/21/19 12:43 PM; Ar40 = L @ 10/21/19 12:43 PM; Ar39 = L @ 10/21/19 12:43 PM; Ar38 = L @ 10/21/19 12:43 PM; Ar37 = L @ 10/21/19 12:43 PM; Ar36 = L @ 10/21/19 12:43 PM; Ar41 bk val,er = @ 10/21/19 12:47 PM; Average background @ 10/21/19 12:47 PM; Ar40 bk val,er = @ 10/21/19 12:47 PM; Line-segment interpolation @ 10/21/19 12:47 PM; Ar39 bk val,er = @ 10/21/19 12:47 PM; Av…	B:24 DS	ALLLLLAAAAAA	1	Pychron Script	1	Fusions CO2	3	0	0	0	0	30	30	205			0	0.0423198	0.0030529	225.851	0.0333523	41.4959	0.0197539	0.510547	0.0077095	0.203528	0.0128534	0.010919	0.0004475	0.0676154	0.0021378	226.781	0.0319219	41.5463	0.018467	0.516454
--- Atmospheric argon ratios and discrimination ---
(40Ar/36Ar)atm	295.5 ± 0.1
(40Ar/38Ar)atm	1575 ± 2
Source of spectrometer discrimination value and error	Data file
Source of spectrometer sensitivity value and error	Saved with run
--- Source of J and use of J Adjustment Table ---
Use J saved with run	TRUE
J adjustment table useage	Multiply times J
--- Minor irradiation parameters (see also Irradiation Data File) ---
(38Ar/37Ar)Ca	0.0000196 ± 8.160000e-7
(38Ar/39Ar)K	0.0122 ± 0.000027
P(36Cl/38Cl)	295.5 ± 0
--- Decay constants ---
Lambda 40K epsilon	5.463000e-10 ± 5.810000e-11
Lambda 40K Beta	0 ± 4.962000e-10
Lambda 37Ar	0.01975 ± 5.463000e-10
Lambda 39Ar	7.068000e-6 ± 5.530500e-10
Lambda 36Cl	6.308000e-9 ± 5.543000e-10
--- Calculation options ---
Normalize gain	FALSE
Use volume fraction delivered to ms to normalize gain	FALSE
Always calculate without ratios	TRUE
Calc. %40Ar* as %40*/(40*+40Atm)	TRUE
Number of trials in Monte Carlo sim.	1
37Ar/39Ar calculation	Normal
H35Cl Correction	FALSE
--- Isotope curve fitting ---
Parabolic vs. Linear probability cutoff	0.05
Error envelope as 1 or 2 sigma	1
Delete outliers within cycles before fit	FALSE
Average cycles before fit	FALSE
Delete outliers after fit	TRUE
Number of iterations of deleting outliers after fit	1
Cutoff for detecting outliers, sigma	3
Method of centroid location is	mean
--- Files ---
Irradiation data file	Macintosh HD:Users:matthewheizler:KAr:Aux Data:J Adjustment Table
J Adjustment table	Macintosh HD:Users:matthewheizler:KAr:Aux Data:J Adjustment Table
[truncated: 123 more columns]
